# Supplementary material for: A green and rapid approach for the stereoselective vinylation of phenol, thiol and amine derivatives in water
Source: Royal Society of Chemistry journal article supplement (doi:10.1039/c1gc15625j), 2011-01-01

Supplementary Data

**A green and rapid approach for the stereoselective vinylation of phenol, thiol and amine derivatives in water**

Yaghoub Sarrafi,\* Marzieh sadatshahabi, Kamal Alimohammadi and Mahmood

Tajbakhsh *Department of Organic Chemistry, Faculty of Chemistry, Mazandaran University,*

*Babolsar, Iran, E-mail: [ysarrafi@umz.ac.ir](mailto:ysarrafi@umz.ac.ir)*

| List of contents                               | Page  | List of contents          | Page | List of contents          | Page |
|------------------------------------------------|-------|---------------------------|------|---------------------------|------|
| Title, author's name, address, general methods | S1-S2 | <sup>13</sup> C NMR of 1t | S24  | <sup>13</sup> C NMR of 2i | S46  |
| <sup>1</sup> H NMR of 1g                       | S3    | <sup>1</sup> H NMR of 1u  | S25  | <sup>1</sup> H NMR of 2j  | S47  |
| <sup>13</sup> C NMR of 1g                      | S4    | <sup>13</sup> C NMR of 1u | S26  | <sup>13</sup> C NMR of 2j | S48  |
| <sup>1</sup> H NMR of 1h                       | S5    | <sup>1</sup> H NMR of 1x  | S27  | <sup>1</sup> H NMR of 2k  | S49  |
| <sup>13</sup> C NMR of 1h                      | S6    | <sup>13</sup> C NMR of 1x | S28  | <sup>13</sup> C NMR of 2k | S50  |
| <sup>1</sup> H NMR of 1i                       | S7    | <sup>1</sup> H NMR of 2a  | S29  | <sup>1</sup> H NMR of 2l  | S51  |
| <sup>13</sup> C NMR of 1i                      | S8    | <sup>13</sup> C NMR of 2a | S30  | <sup>13</sup> C NMR of 2l | S52  |
| <sup>1</sup> H NMR of 1l                       | S9    | <sup>1</sup> H NMR of 2b  | S31  | <sup>1</sup> H NMR of 2m  | S53  |
| <sup>13</sup> C NMR of 1l                      | S10   | <sup>13</sup> C NMR of 2b | S32  | <sup>13</sup> C NMR of 2m | S54  |
| <sup>1</sup> H NMR of 1m                       | S11   | <sup>1</sup> H NMR of 2c  | S33  | <sup>1</sup> H NMR of 2n  | S55  |
| <sup>13</sup> C NMR of 1m                      | S12   | <sup>13</sup> C NMR of 2c | S34  | <sup>13</sup> C NMR of 2n | S56  |
| <sup>1</sup> H NMR of 1n                       | S13   | <sup>1</sup> H NMR of 2d  | S35  | <sup>1</sup> H NMR of 2o  | S57  |
| <sup>13</sup> C NMR of 1n                      | S14   | <sup>13</sup> C NMR of 2d | S36  | <sup>13</sup> C NMR of 2o | S58  |
| <sup>1</sup> H NMR of 1o                       | S15   | <sup>1</sup> H NMR of 2e  | S37  | <sup>1</sup> H NMR of 4a  | S59  |
| <sup>13</sup> C NMR of 1o                      | S16   | <sup>13</sup> C NMR of 2e | S38  | <sup>13</sup> C NMR of 4a | S60  |
| <sup>1</sup> H NMR of 1p                       | S17   | <sup>1</sup> H NMR of 2f  | S39  | <sup>1</sup> H NMR of 4b  | S61  |
| <sup>13</sup> C NMR of 1p                      | S18   | <sup>13</sup> C NMR of 2f | S40  | <sup>13</sup> C NMR of 4b | S62  |
| <sup>1</sup> H NMR of 1q                       | S19   | <sup>1</sup> H NMR of 2g  | S41  | <sup>1</sup> H NMR of 4c  | S63  |
| <sup>13</sup> C NMR of 1q                      | S20   | <sup>13</sup> C NMR of 2g | S42  | <sup>13</sup> C NMR of 4c | S64  |
| <sup>1</sup> H NMR of 1r                       | S21   | <sup>1</sup> H NMR of 2h  | S43  | <sup>1</sup> H NMR of 4d  | S65  |
| <sup>13</sup> C NMR of 1r                      | S22   | <sup>13</sup> C NMR of 2h | S44  | <sup>13</sup> C NMR of 4d | S66  |
| <sup>1</sup> H NMR of 1t                       | S23   | <sup>1</sup> H NMR of 2i  | S45  | <sup>1</sup> H NMR of 5a  | S67  |

Supplementary Data

| List of contents          | Page | List of contents          | Page | List of contents                                                         | Page |
|---------------------------|------|---------------------------|------|--------------------------------------------------------------------------|------|
| <sup>13</sup> C NMR of 5a | S68  | <sup>1</sup> H NMR of 5e  | S75  | <sup>13</sup> C NMR of 5i                                                | S82  |
| <sup>1</sup> H NMR of 5b  | S69  | <sup>13</sup> C NMR of 5e | S76  | <sup>1</sup> H NMR of 5j                                                 | S83  |
| <sup>13</sup> C NMR of 5b | S70  | <sup>1</sup> H NMR of 5f  | S77  | <sup>13</sup> C NMR of 5j                                                | S84  |
| <sup>1</sup> H NMR of 5c  | S71  | <sup>13</sup> C NMR of 5f | S78  | <sup>1</sup> H NMR of 5j                                                 | S83  |
| <sup>13</sup> C NMR of 5c | S72  | <sup>1</sup> H NMR of 5g  | S79  | <sup>13</sup> C NMR of 5j                                                | S84  |
| <sup>1</sup> H NMR of 5d  | S73  | <sup>13</sup> C NMR of 5g | S80  | <sup>1</sup> H NMR of Di- <i>tert</i> -butyl 2-(phenoxy)-2-butenedioate  | S85  |
| <sup>13</sup> C NMR of 5d | S74  | <sup>1</sup> H NMR of 5i  | S81  | <sup>13</sup> C NMR of Di- <i>tert</i> -butyl 2-(phenoxy)-2-butenedioate | S86  |

### Experimental Section:

#### General Considerations

Melting points were measured on an Electrothermal 9100 apparatus. Infrared spectra were recorded on a Shimadzu IR-8300 series FT-IR spectrophotometer. <sup>1</sup>H NMR and <sup>13</sup>C NMR spectra were recorded on a Bruker 400-MHz instrument in CDCl<sub>3</sub> solvent with TMS as a standard. Mass spectra were recorded by a Jeol DX303 HF mass spectrometer. Elemental analyses were carried out by Perkin-Elmer CHN 2400 instrument.

#### Typical procedure for synthesis of 1a

Phenol (0.188 g, 2 mmol) was dissolved in aqueous solution of K<sub>2</sub>CO<sub>3</sub> (0.276 g, 2 mmol) and DMAD (0.284 g, 2 mmol) was added. The reaction mixture was stirred vigorously at room temperature. A turbid solution was formed which by consumption of phenol (monitored by TLC) in 5 min., the reaction mixture became clear and dimethyl (Z)-2-(phenoxy)-2-butenedioate **1a** existed as solid in water. The product was isolated by filtration without further purification.

Compounds **1a-f**, **j**, **k**, **s**, **v**, **w** and **5j** are known compounds and were characterized by comparison of their physical and spectroscopic data with those of reported ones.<sup>24n, o, 27, 30, 31, 32j, 40</sup> Spectral data of new compounds are reported here.

Supplementary Data

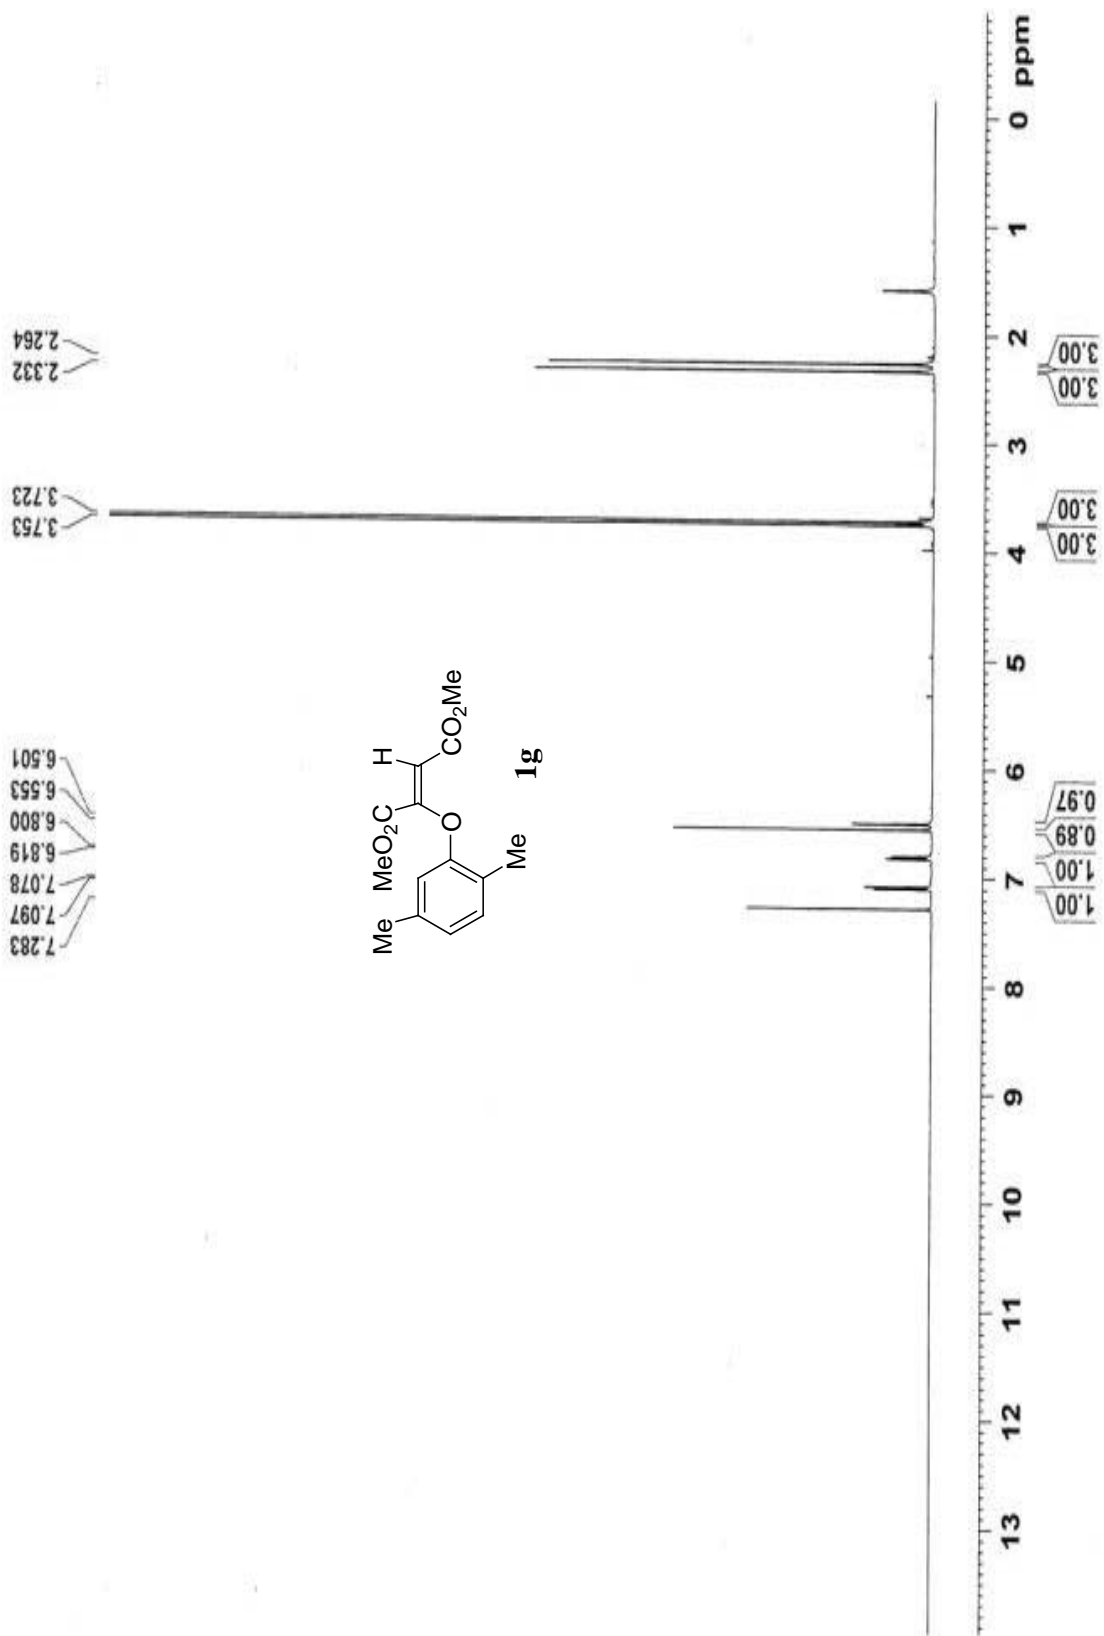

Supplementary Data

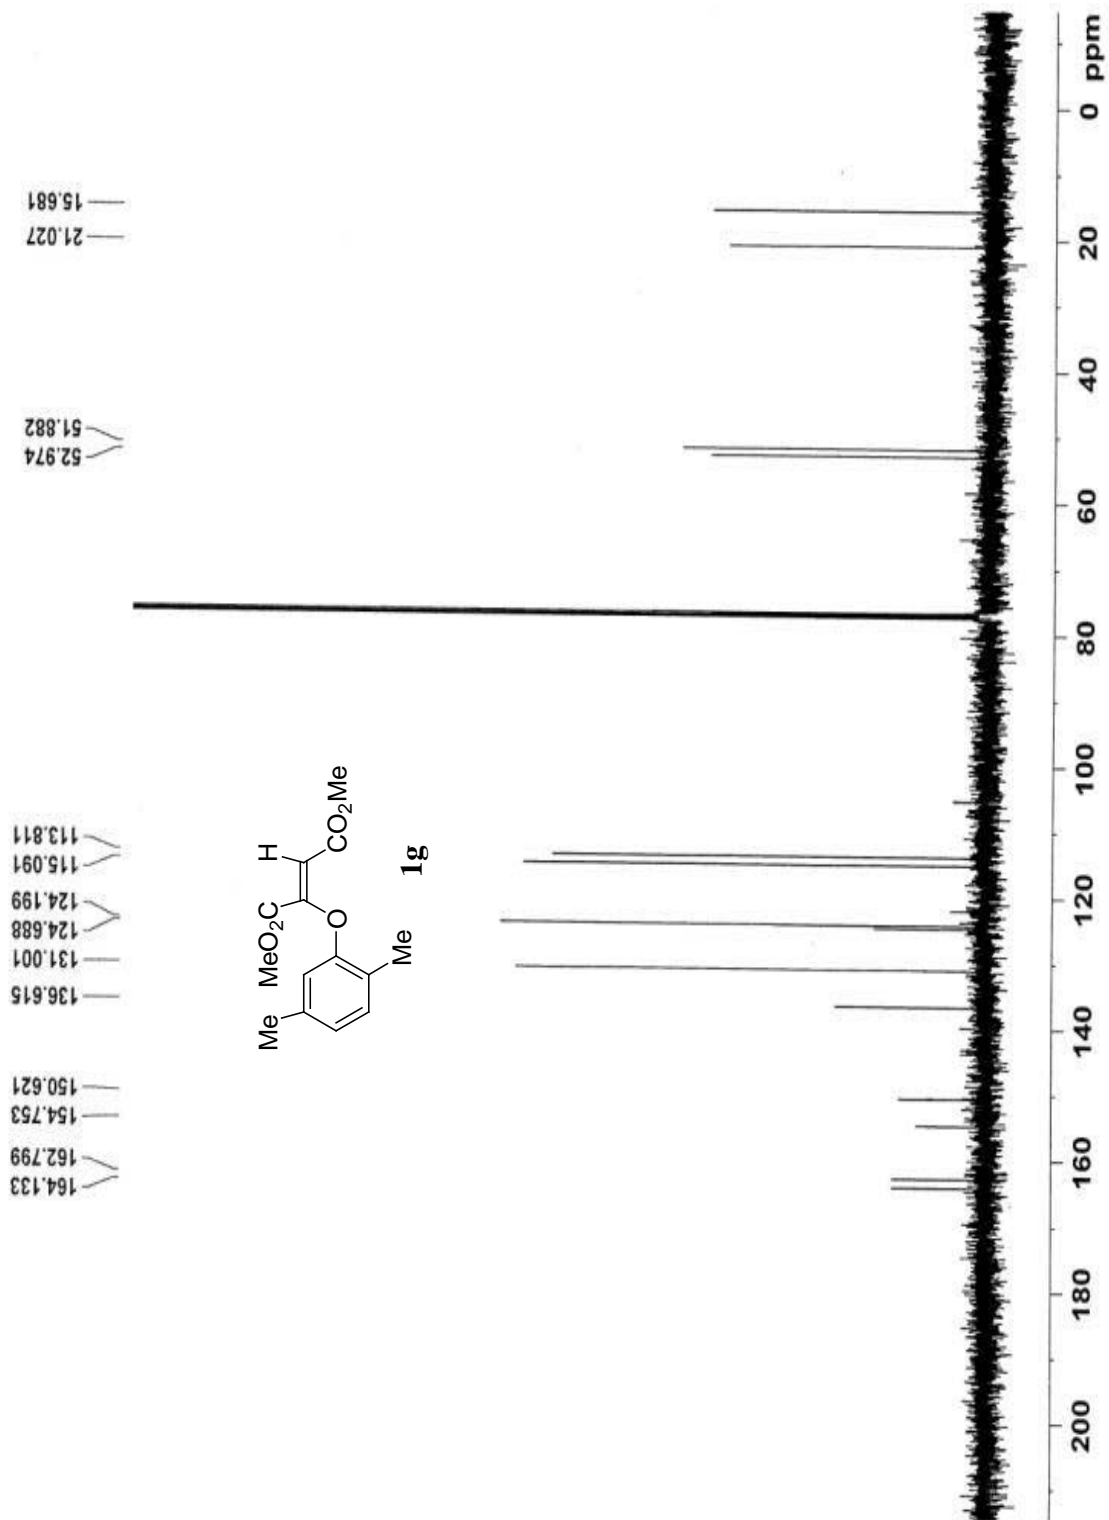

Supplementary Data

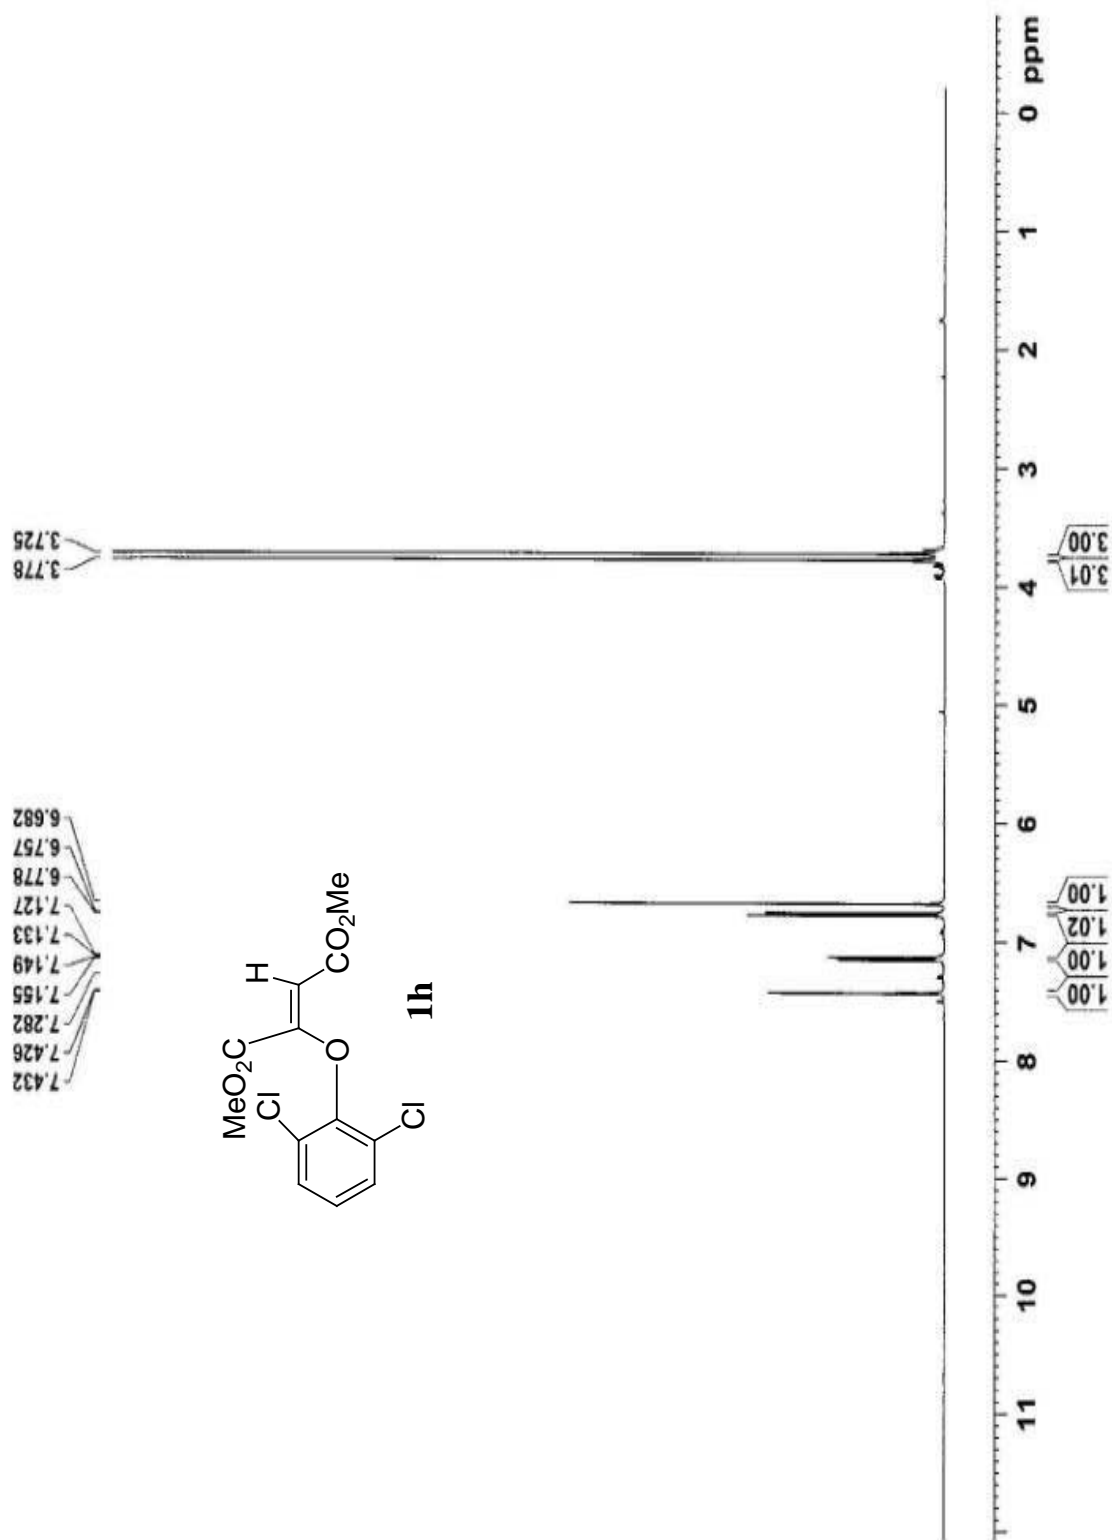

Supplementary Data

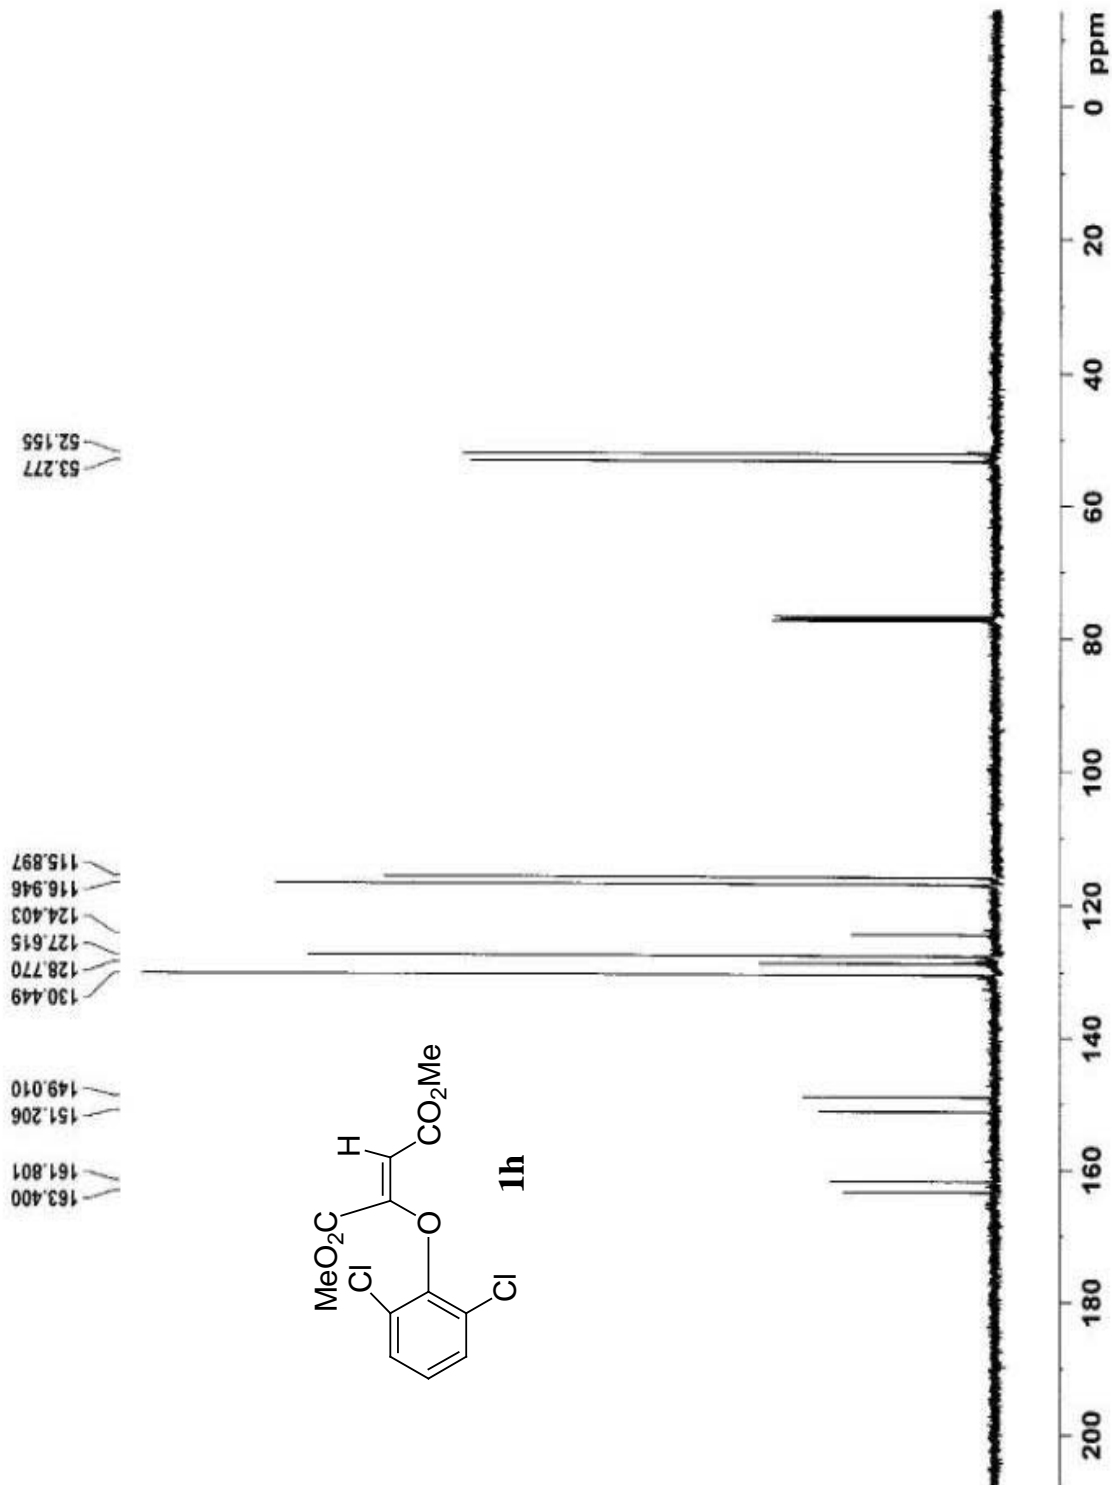

Supplementary Data

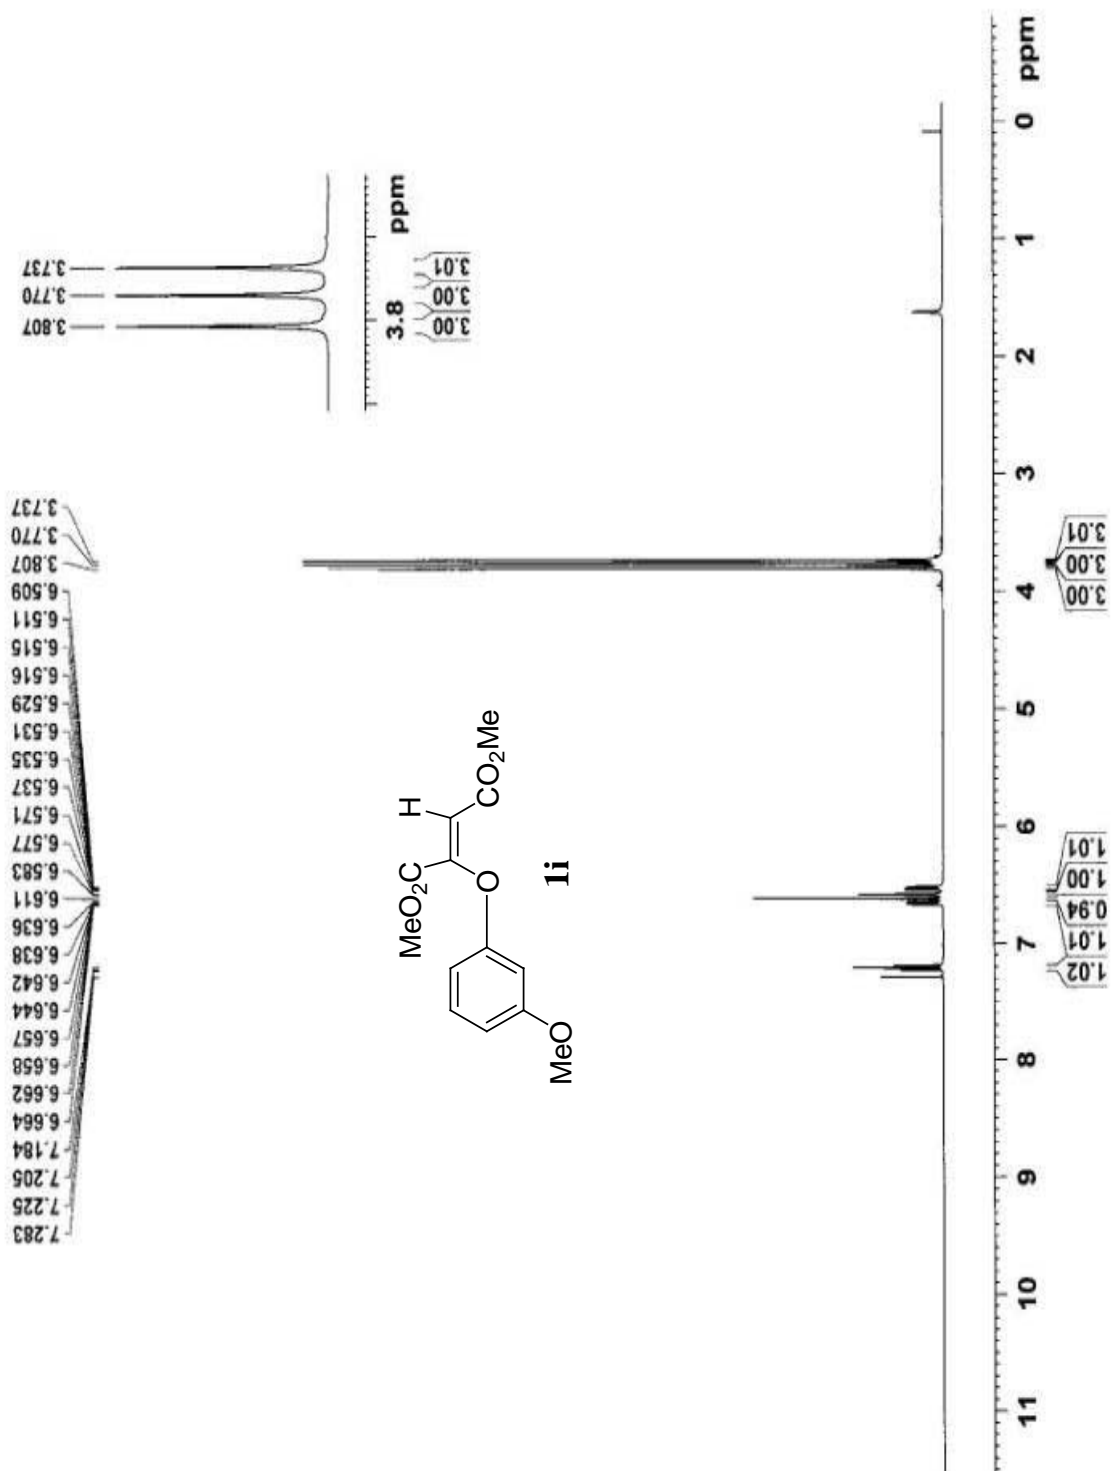

Supplementary Data

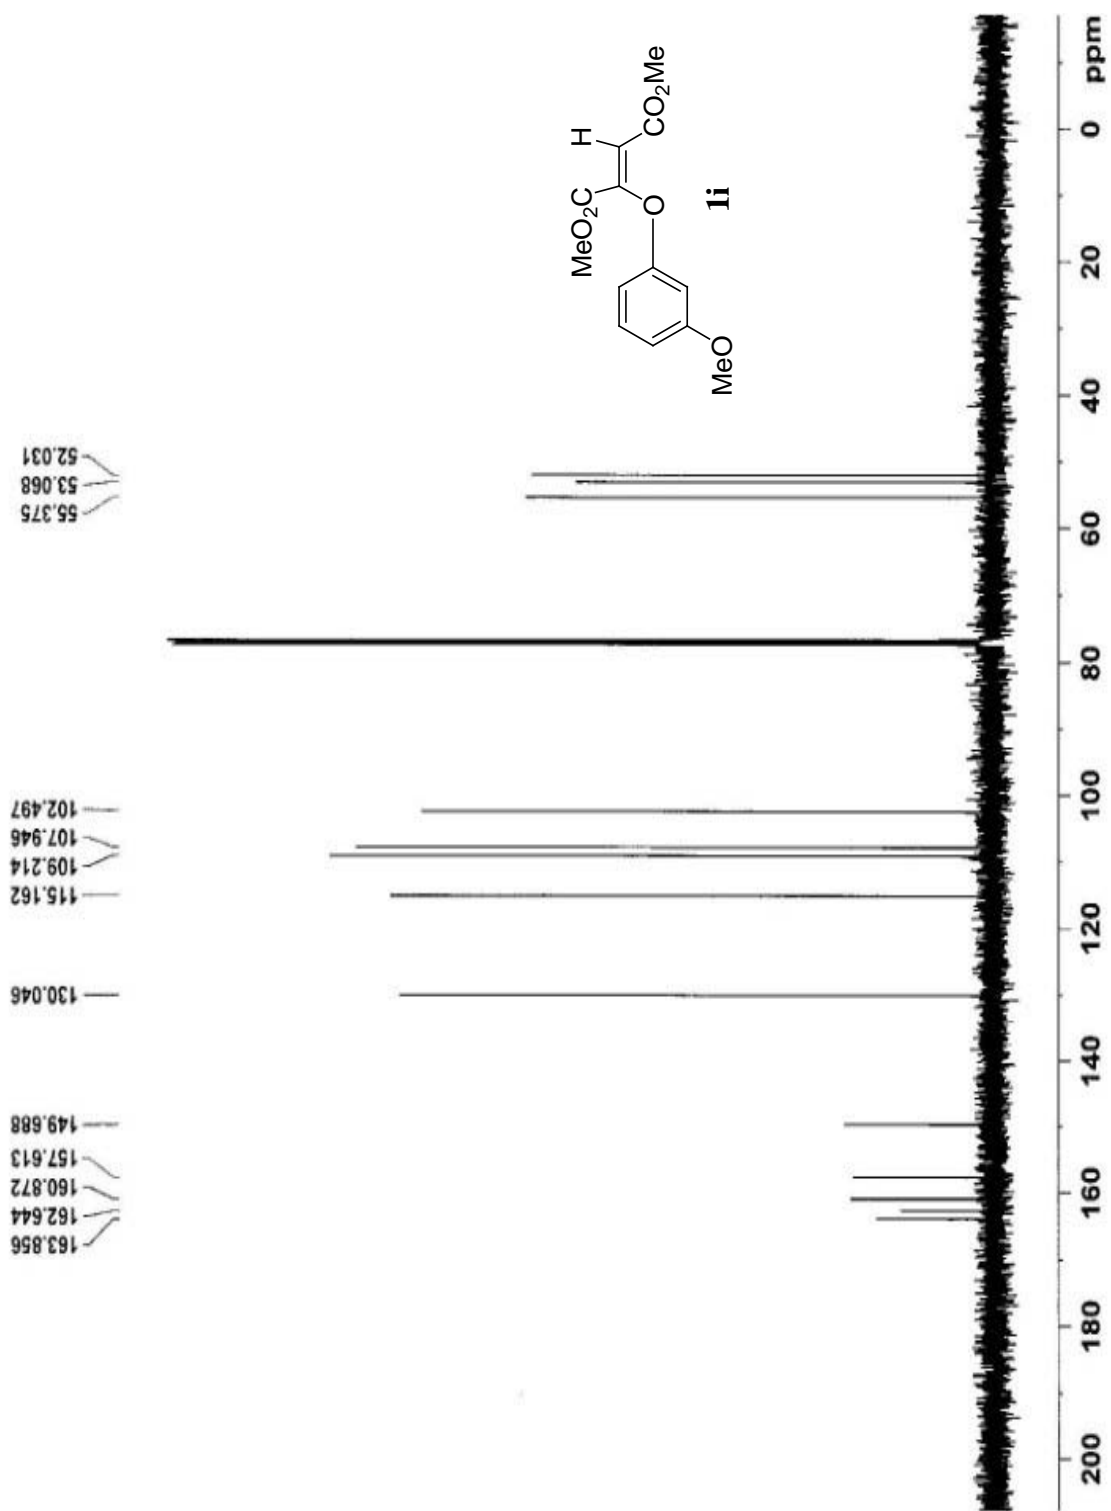



Supplementary Data

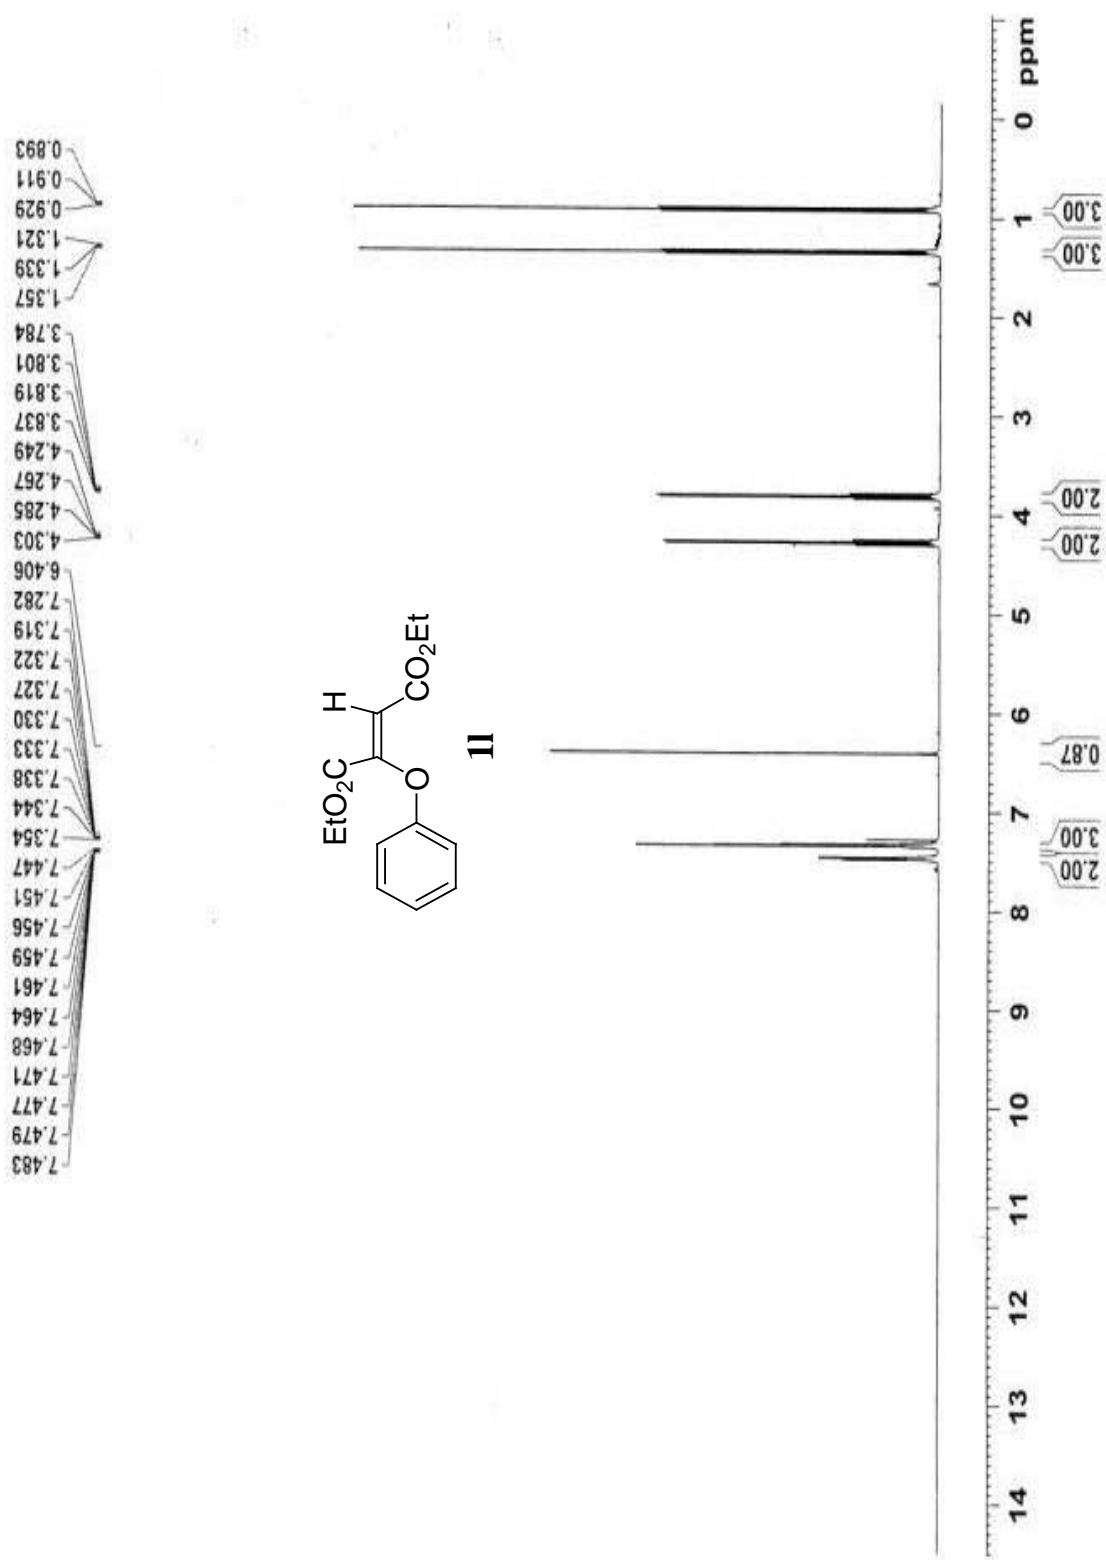

Supplementary Data

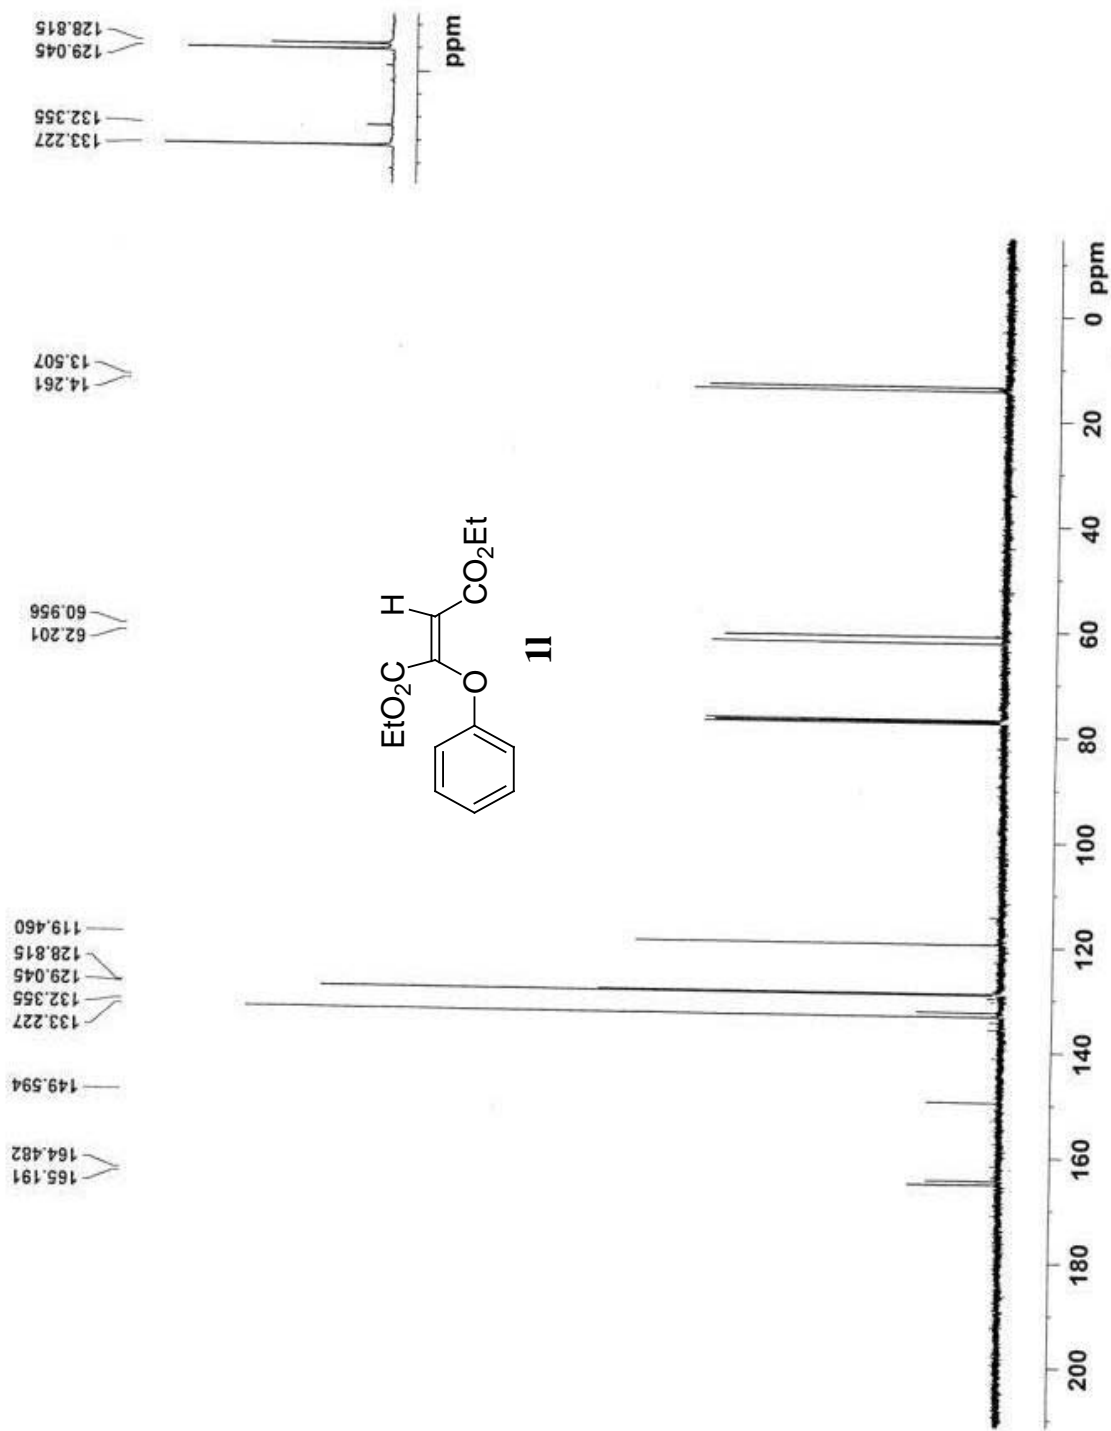

Supplementary Data

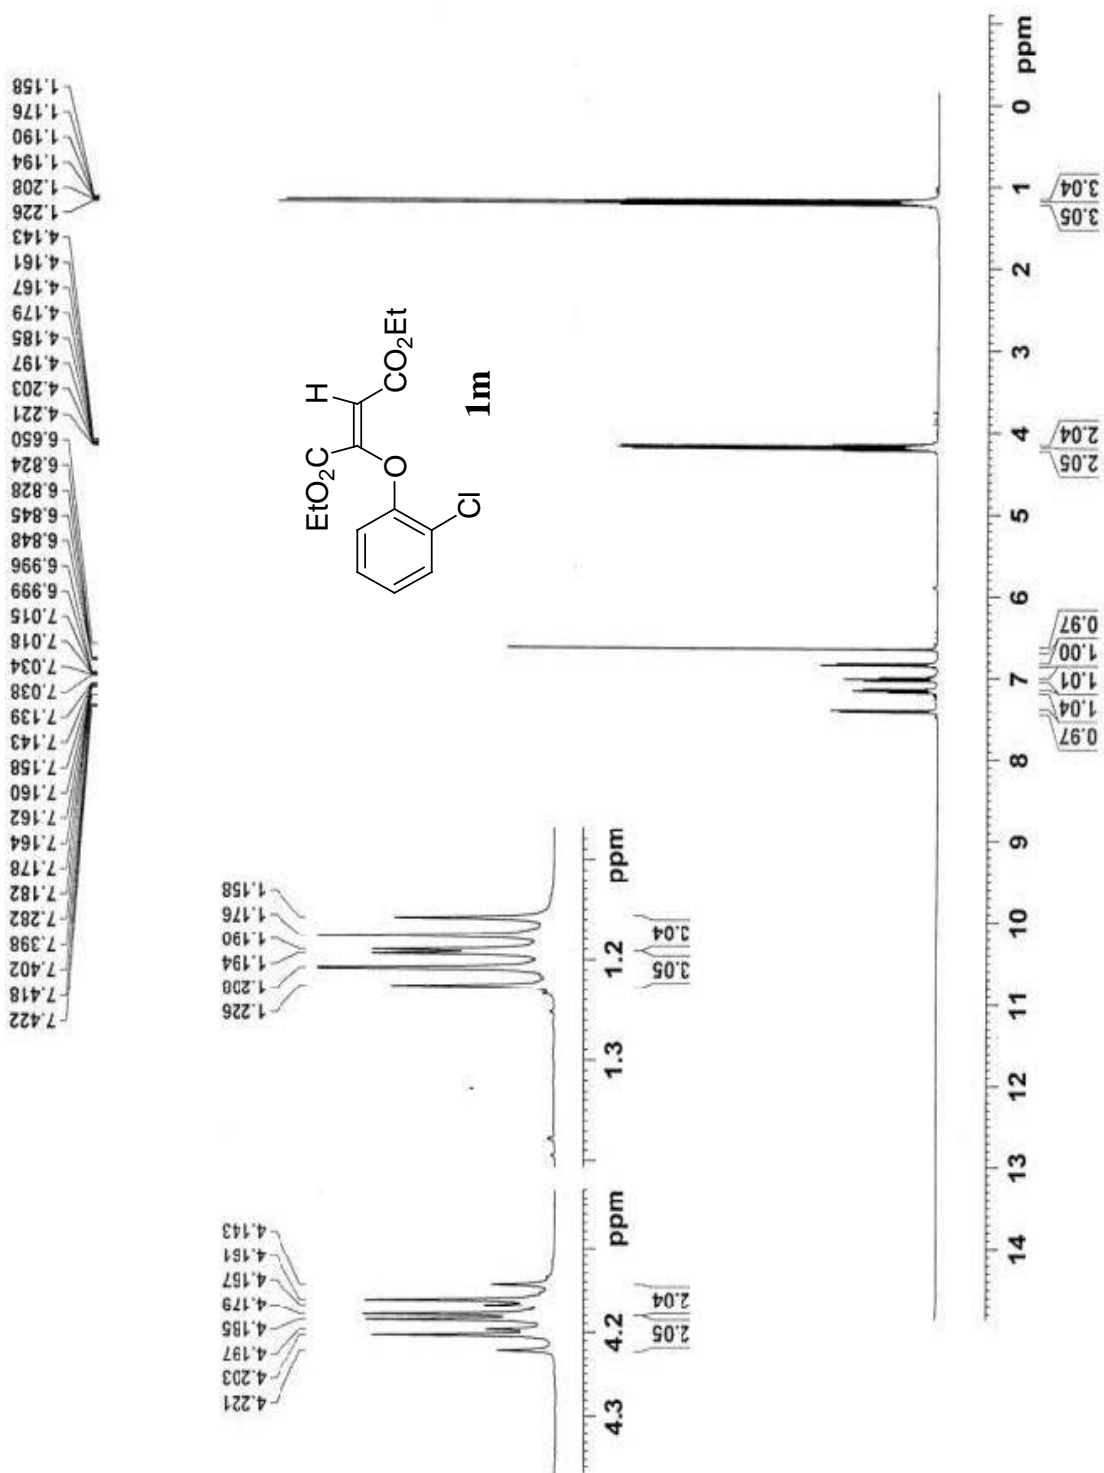

Supplementary Data

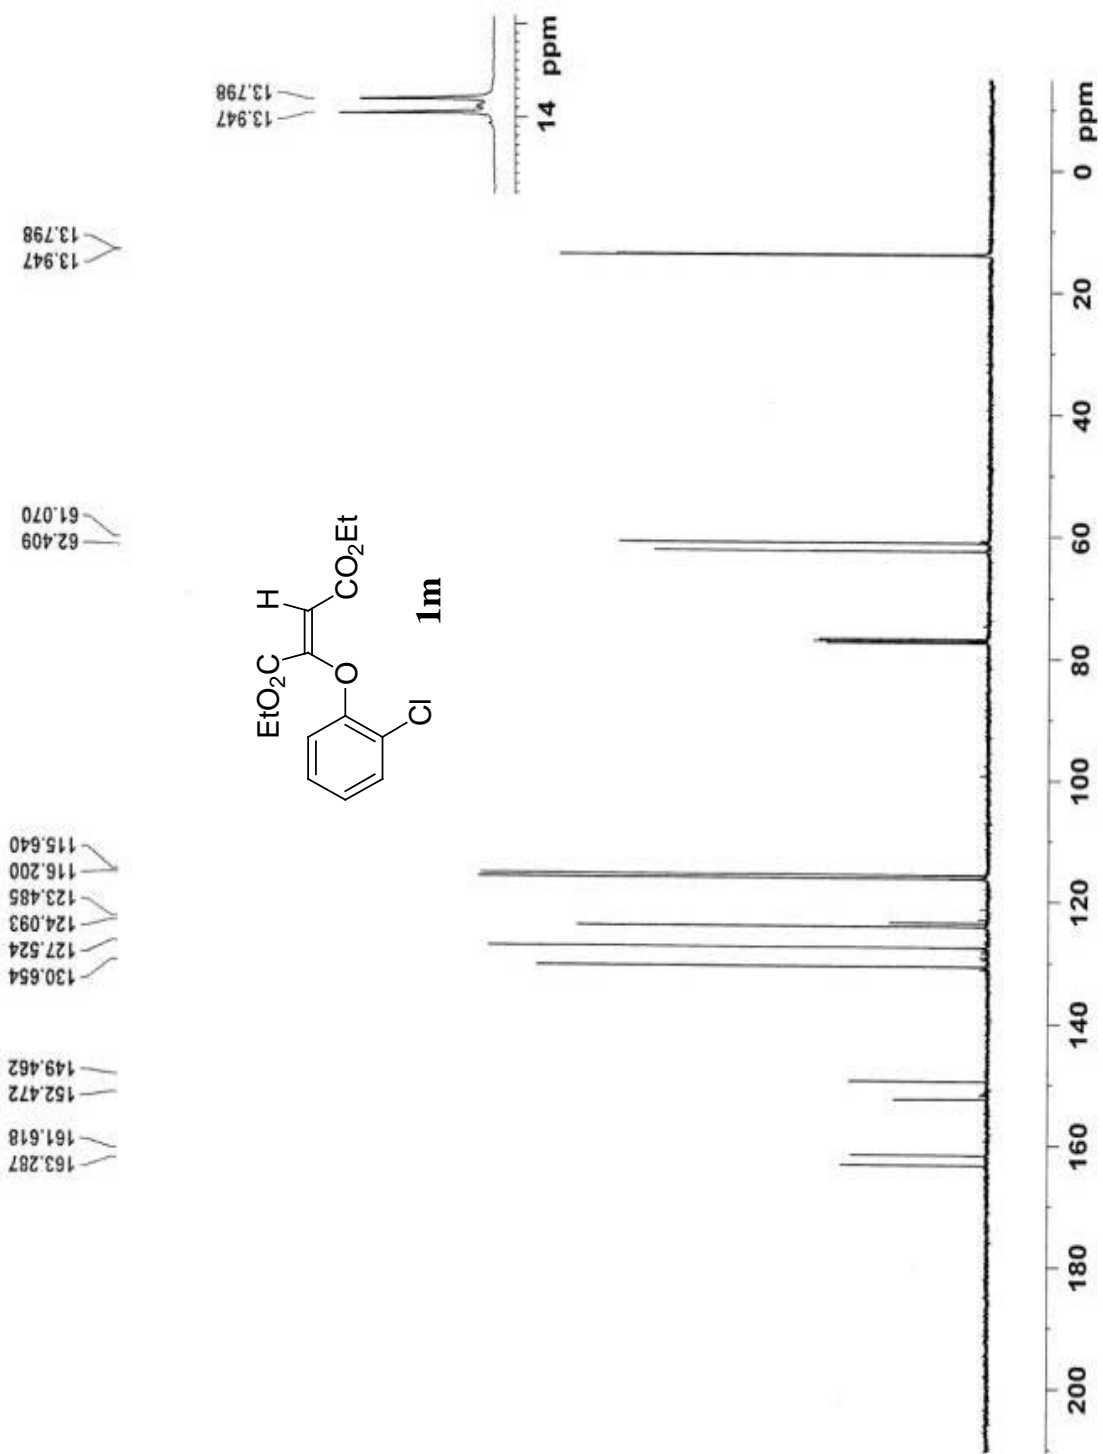

Supplementary Data

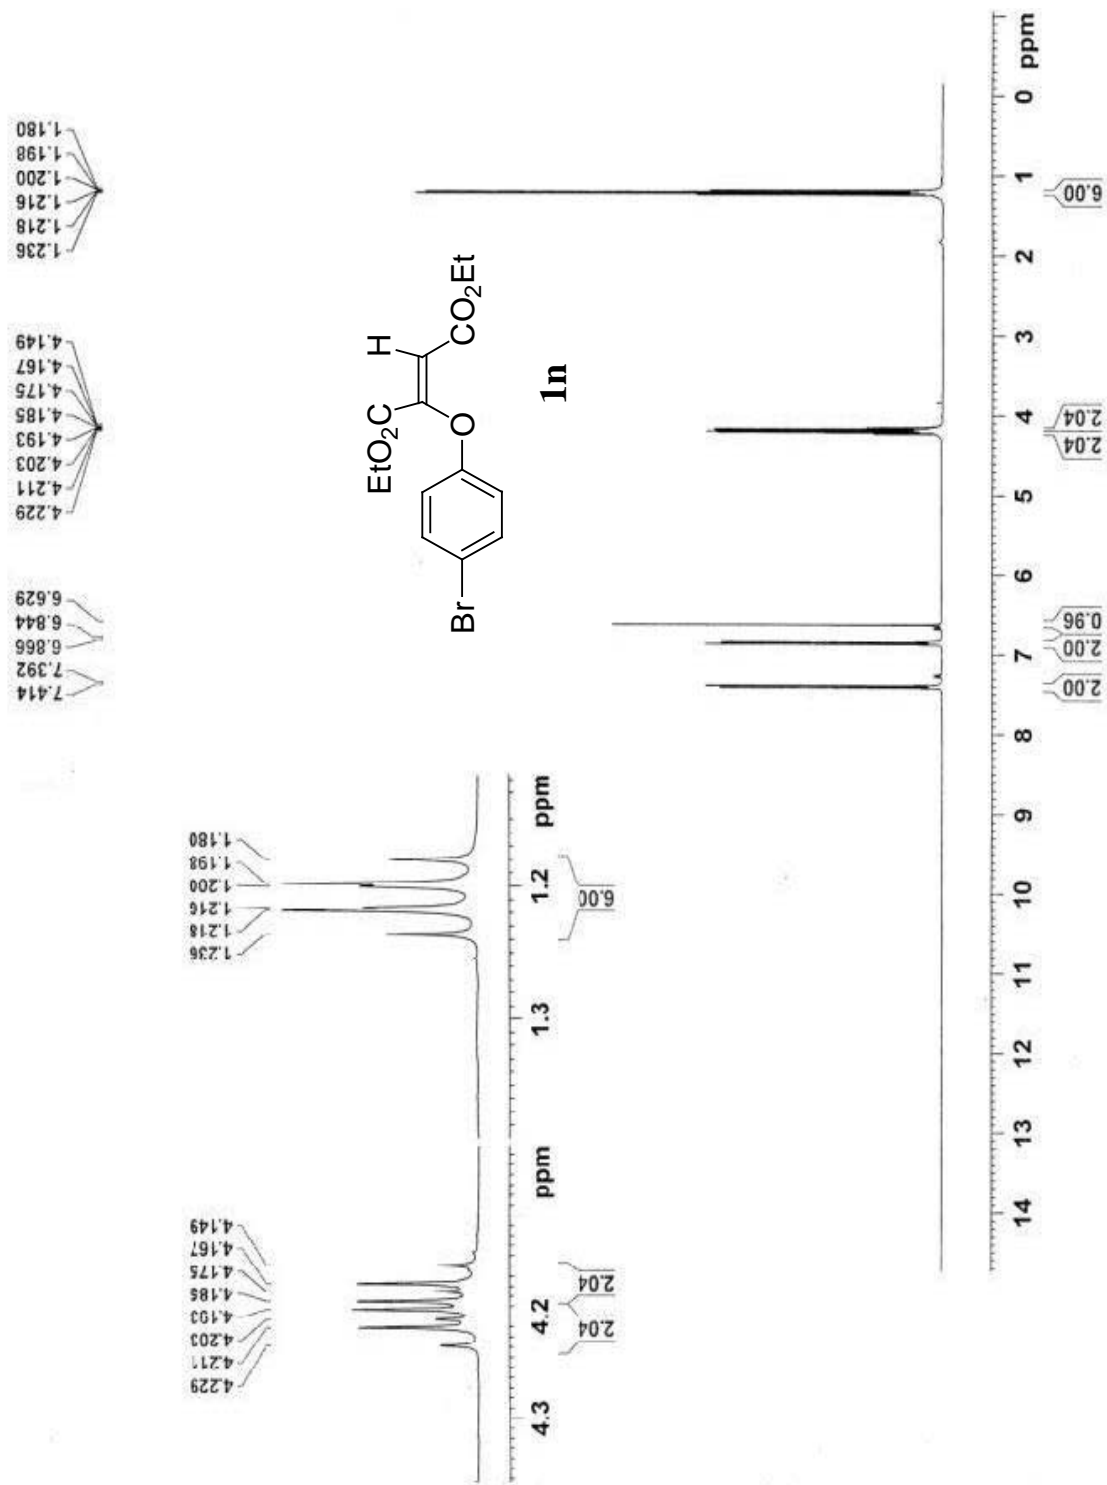

Supplementary Data

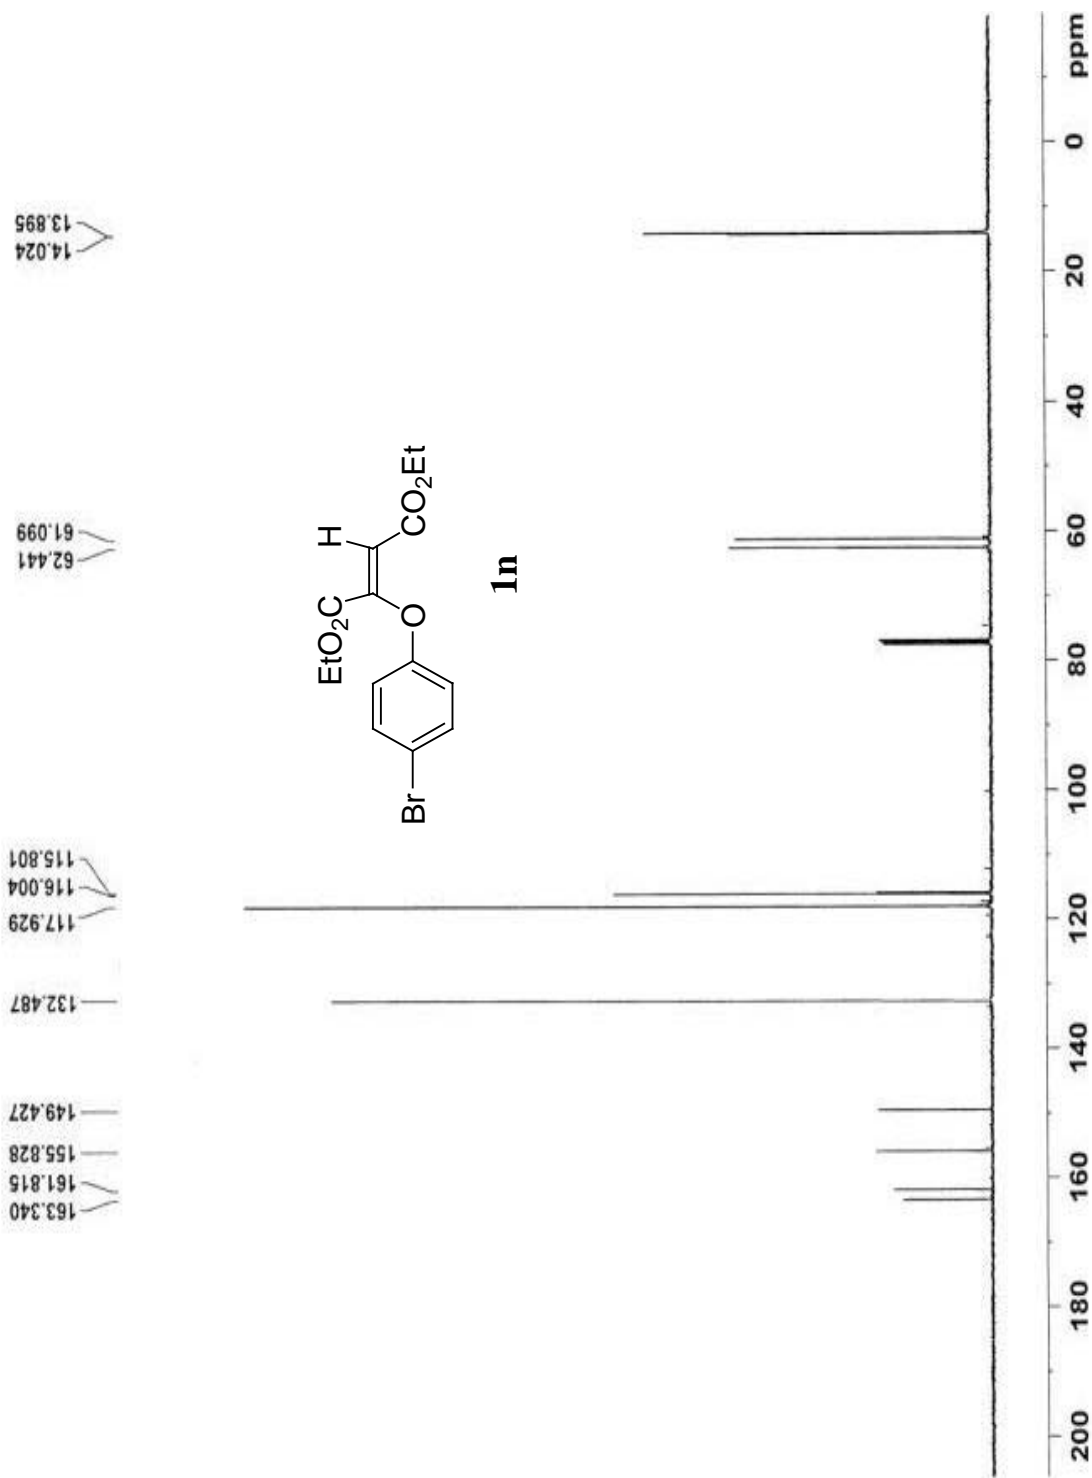

Supplementary Data

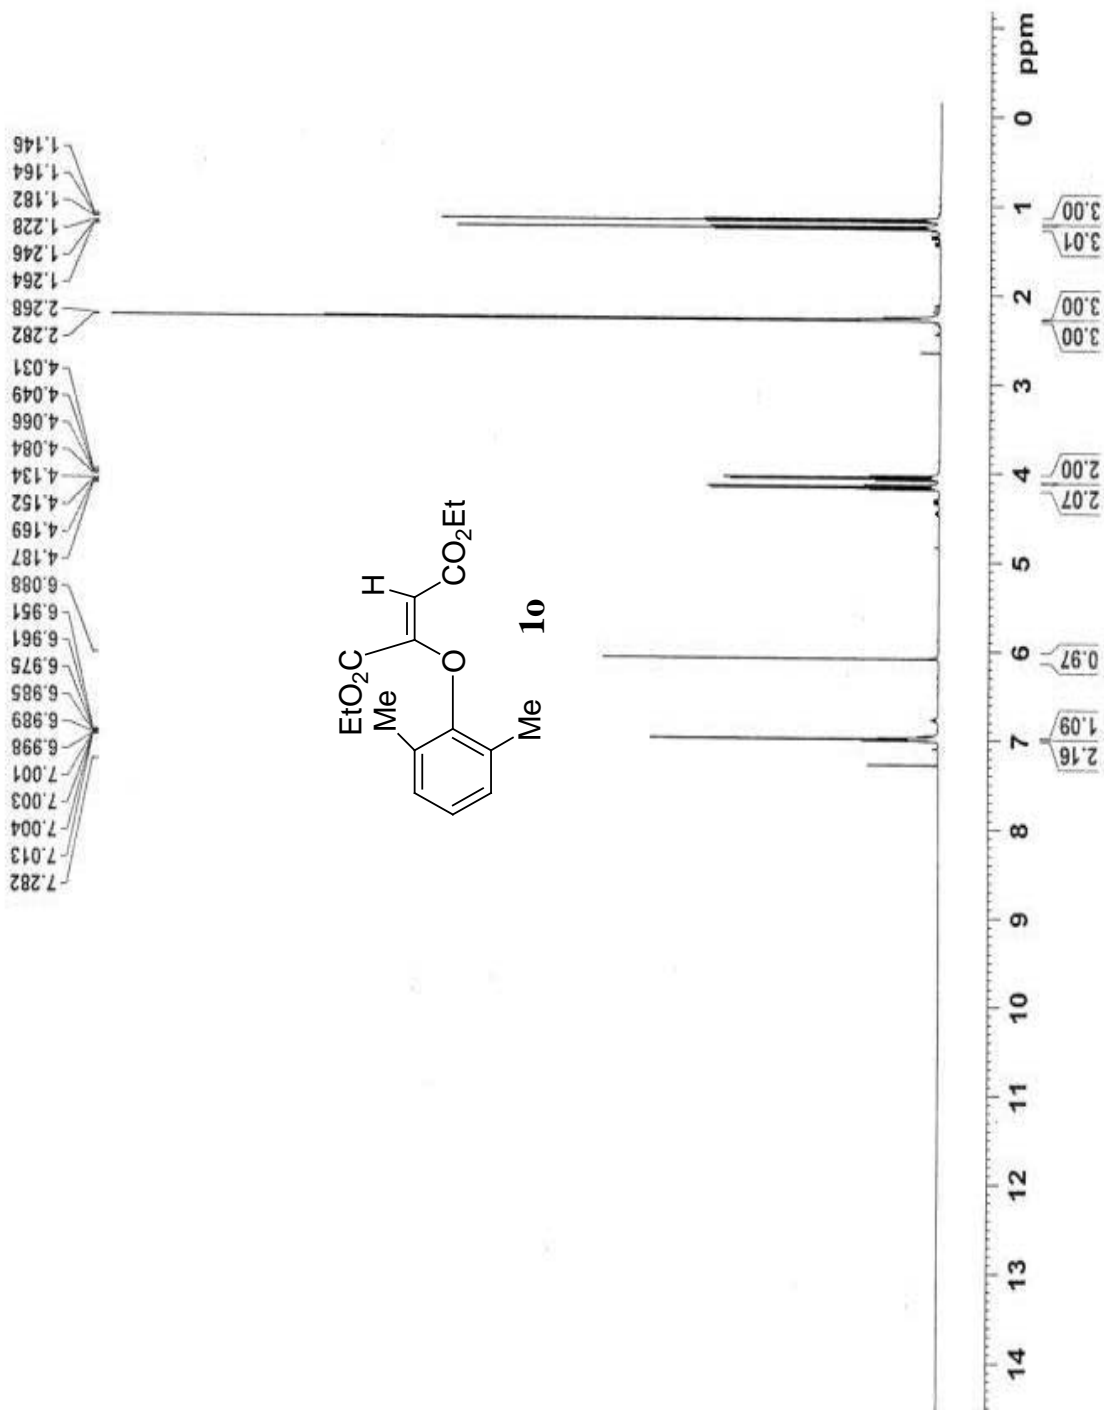

Supplementary Data

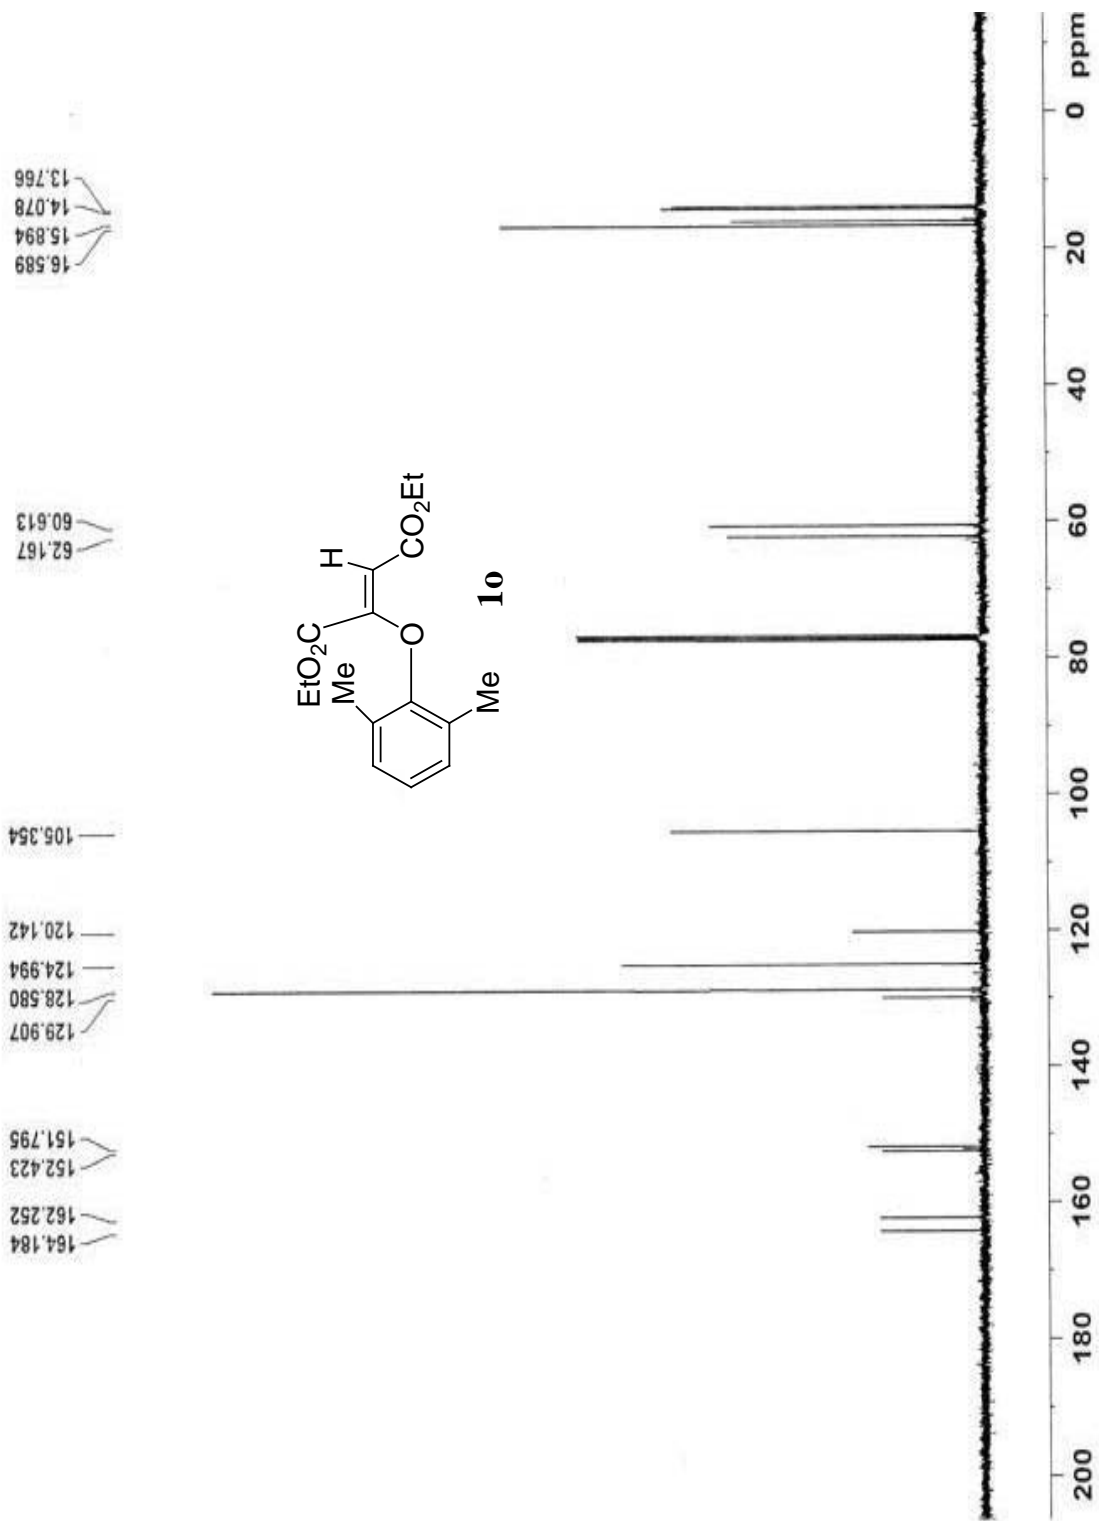



Supplementary Data

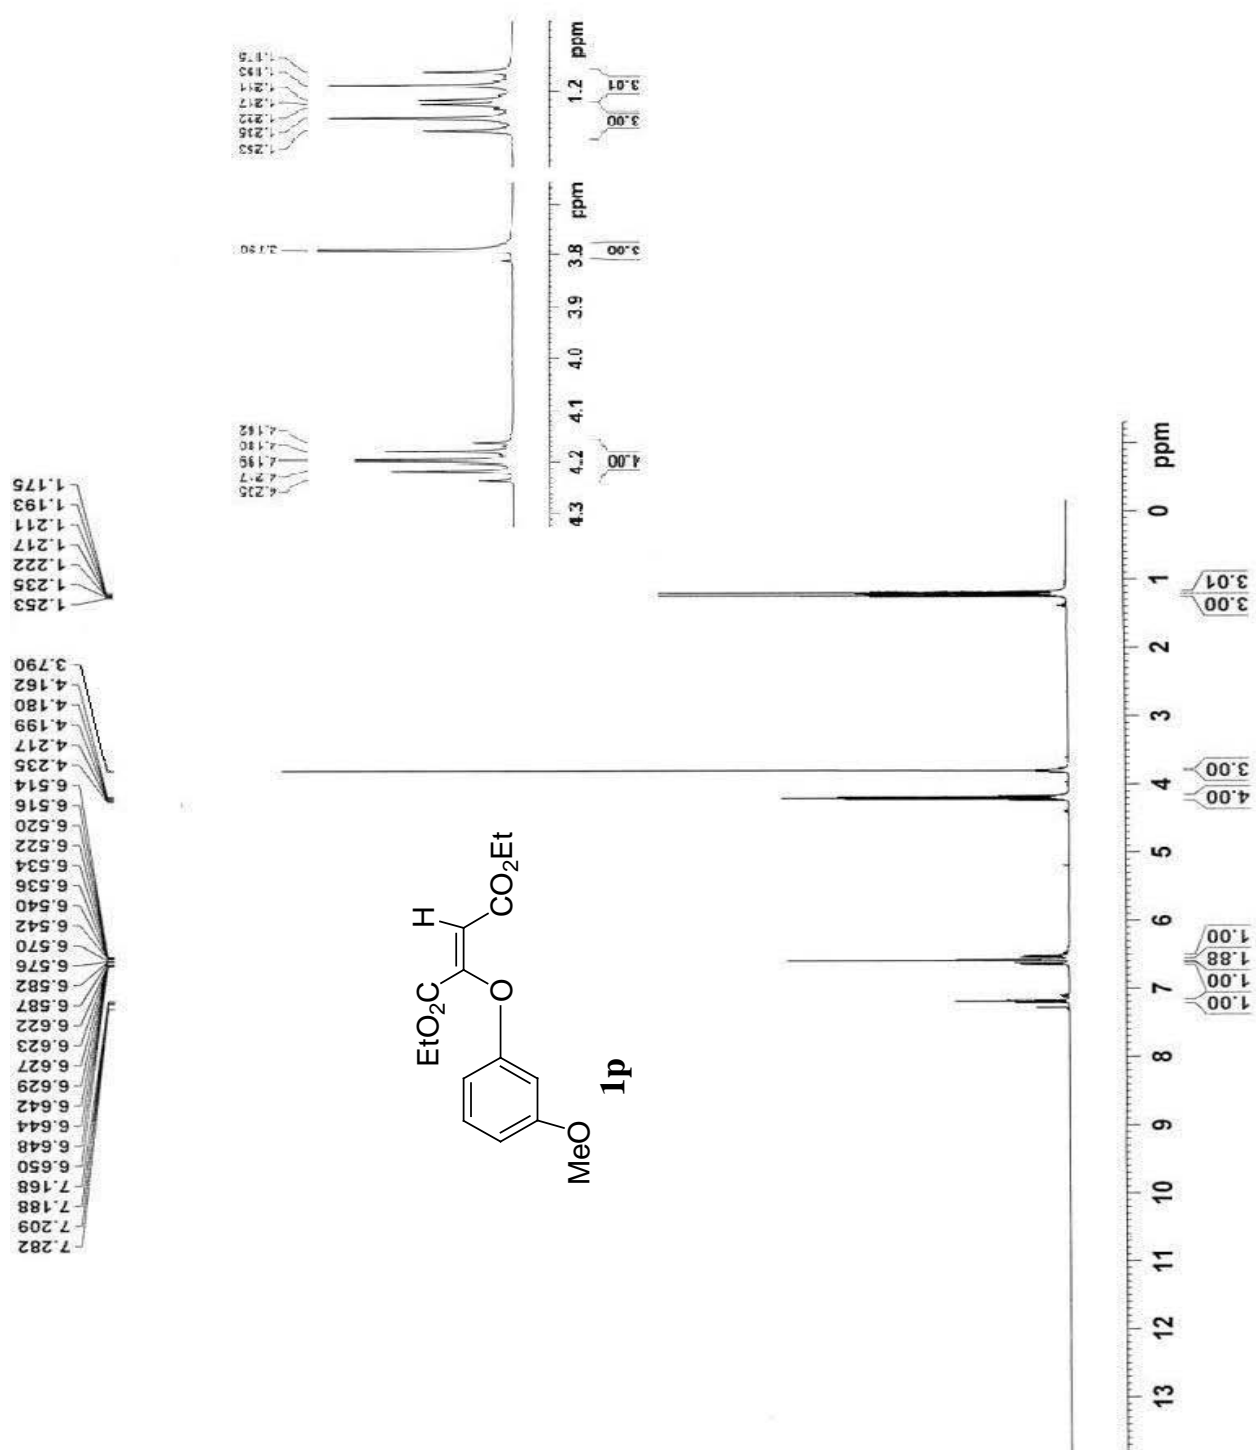

Supplementary Data

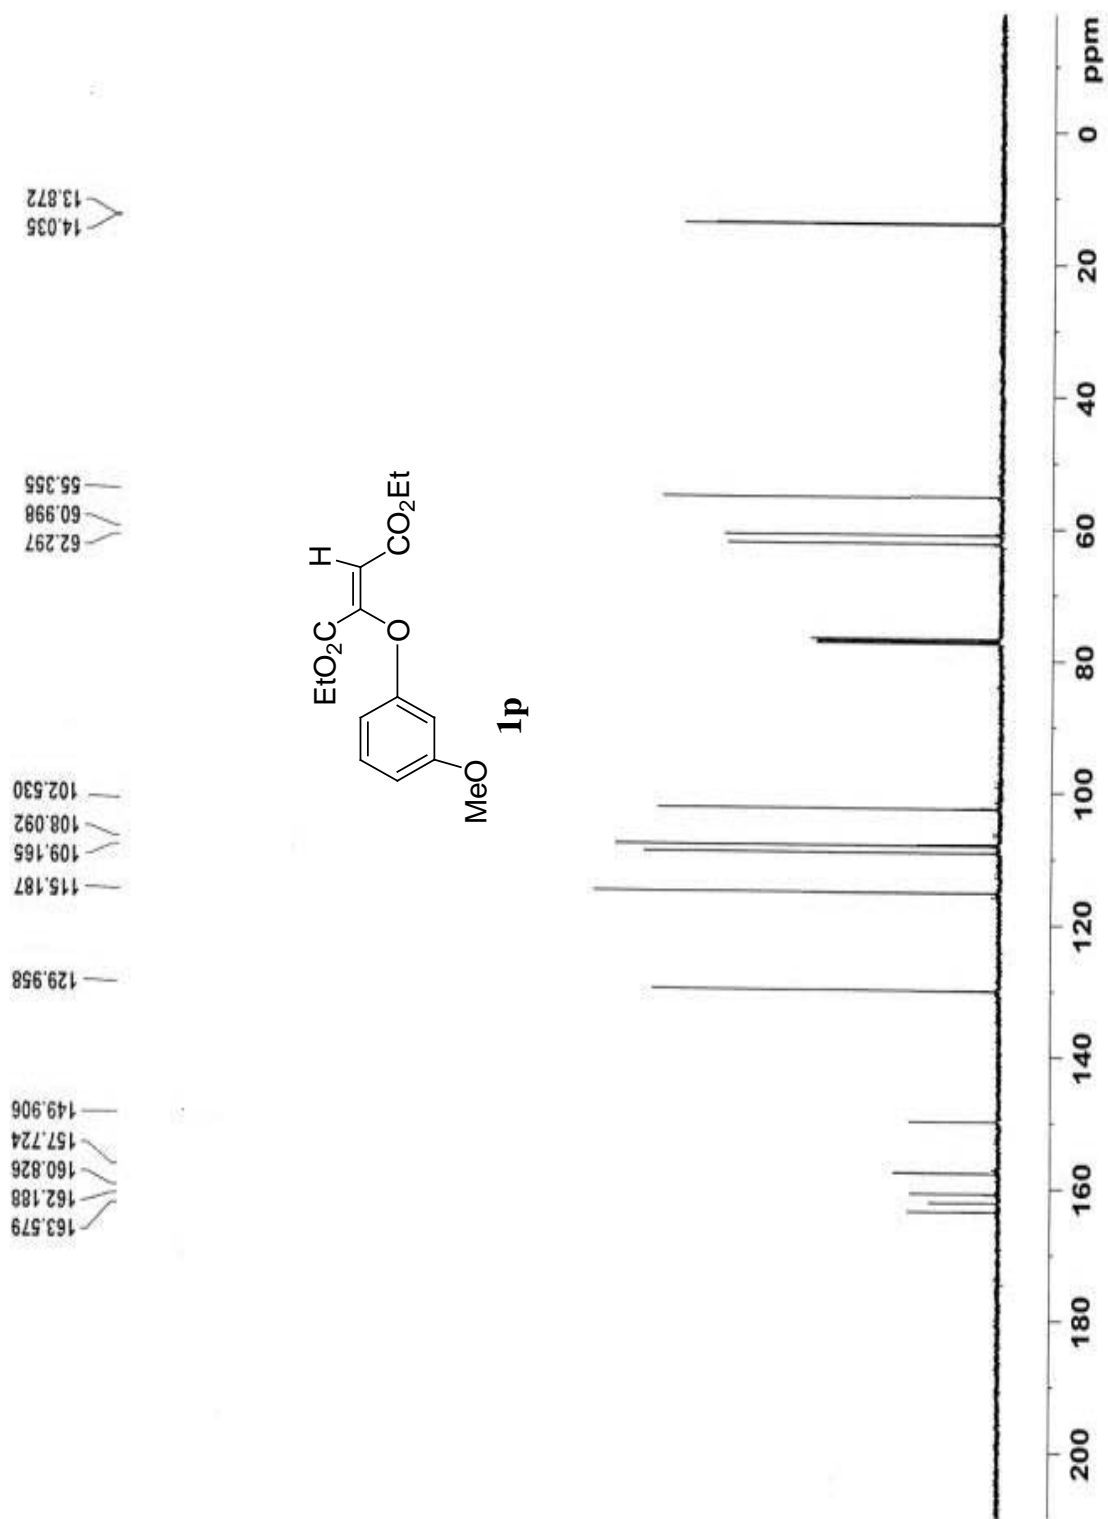

Supplementary Data

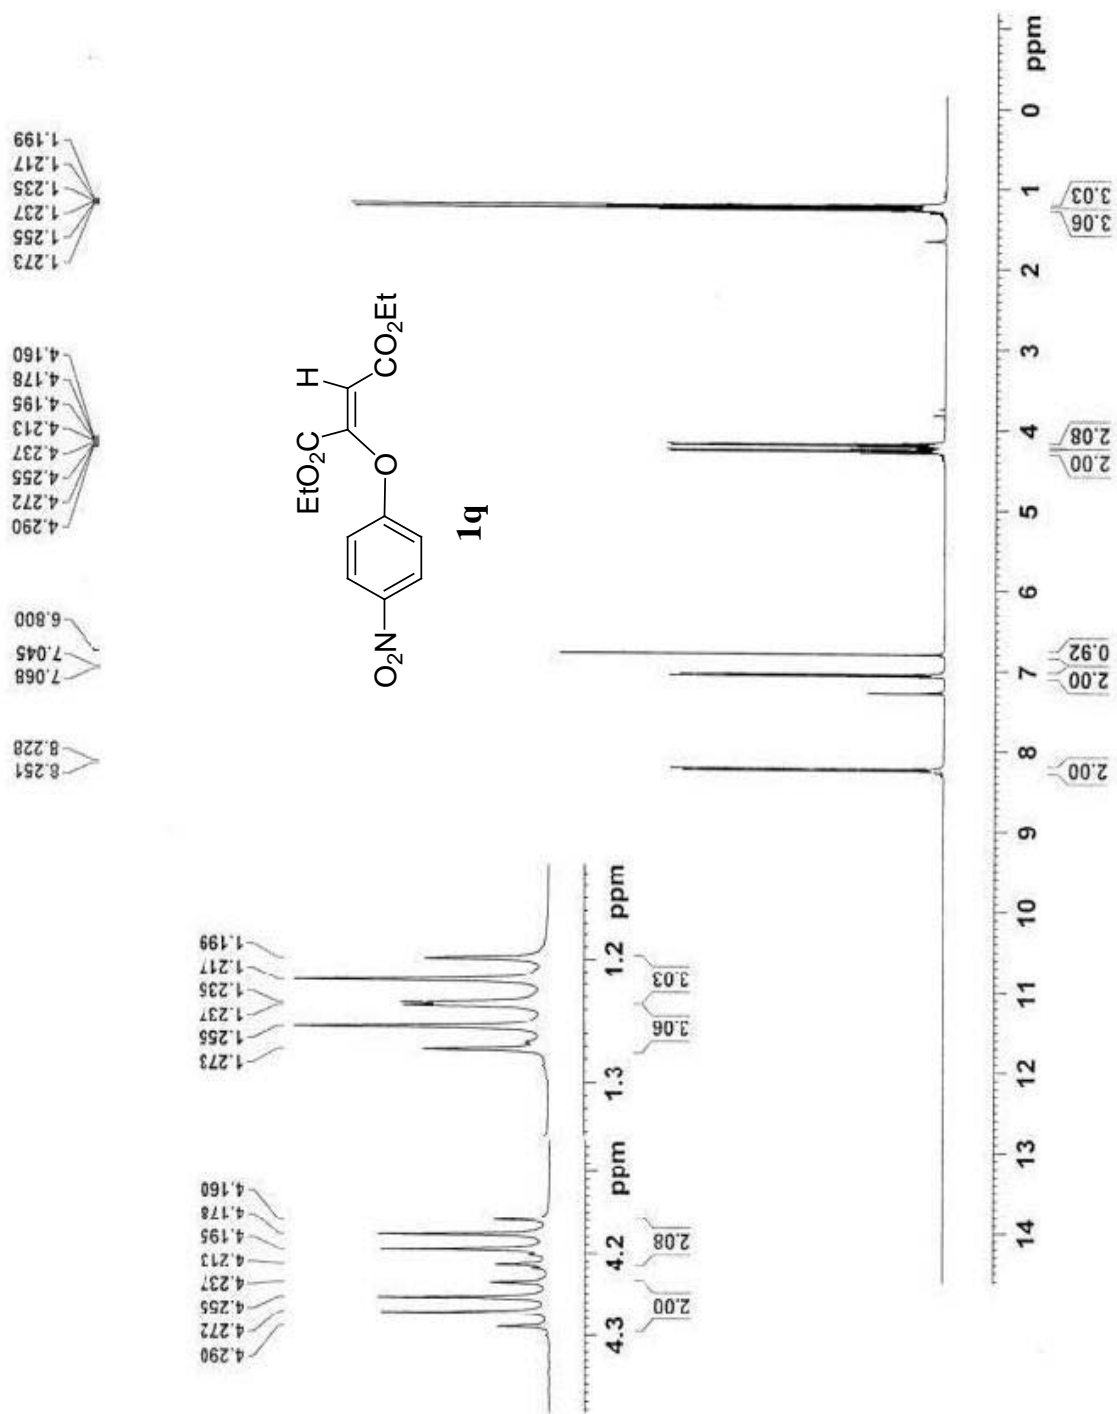

Supplementary Data

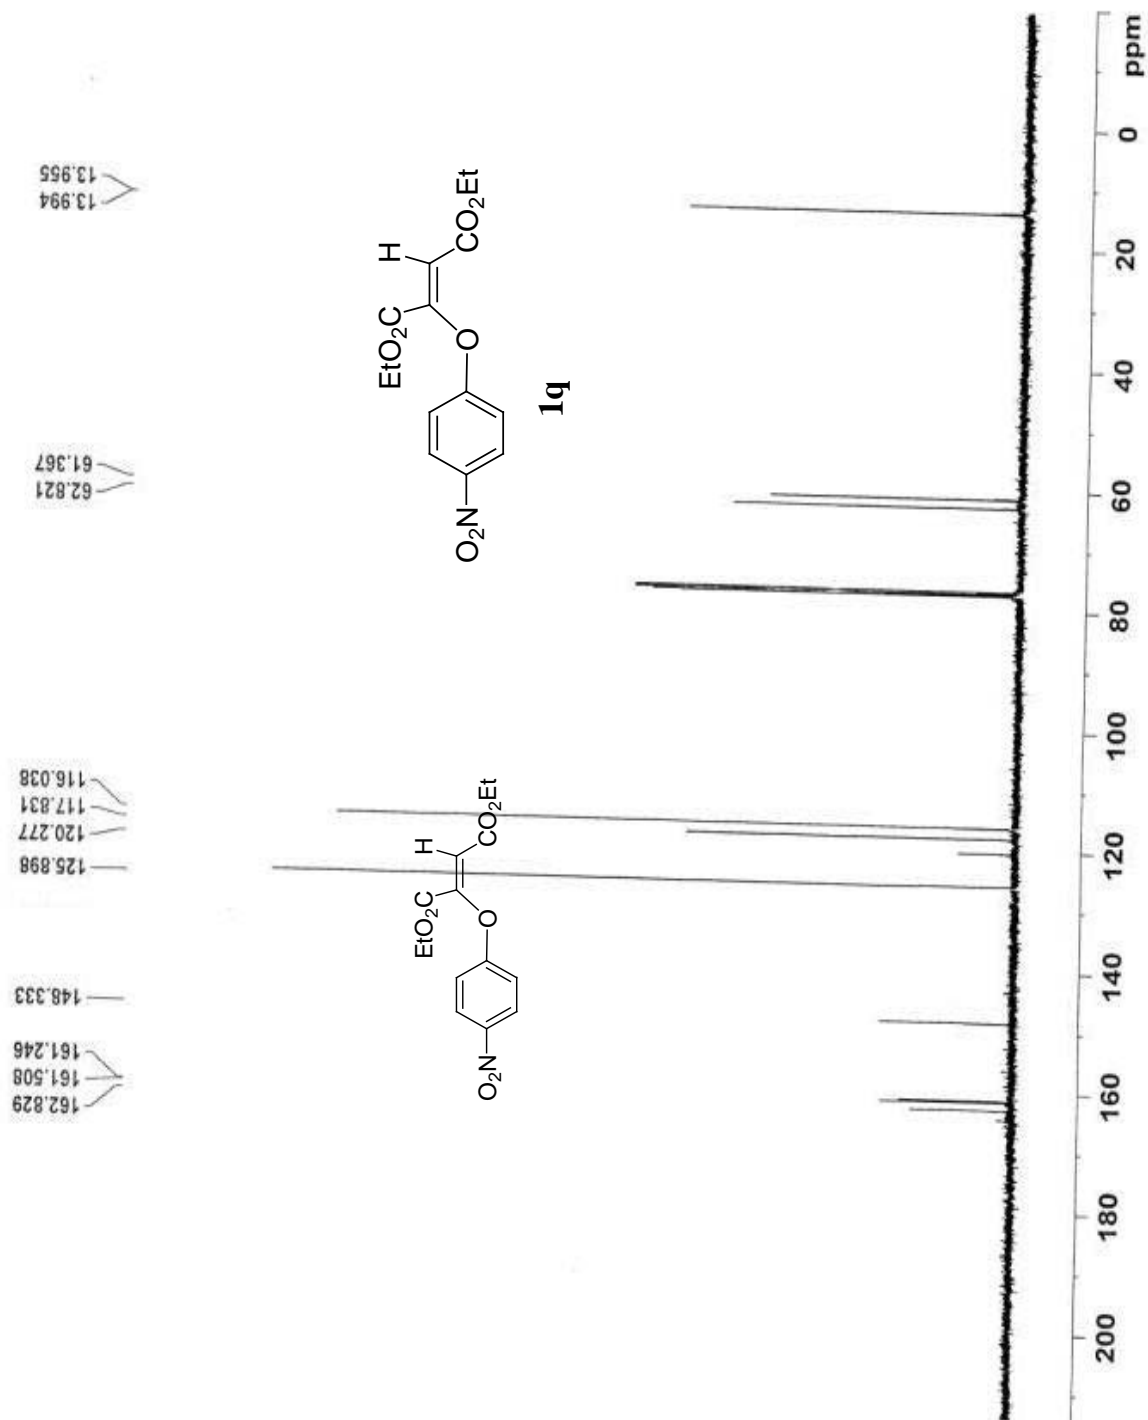

Supplementary Data

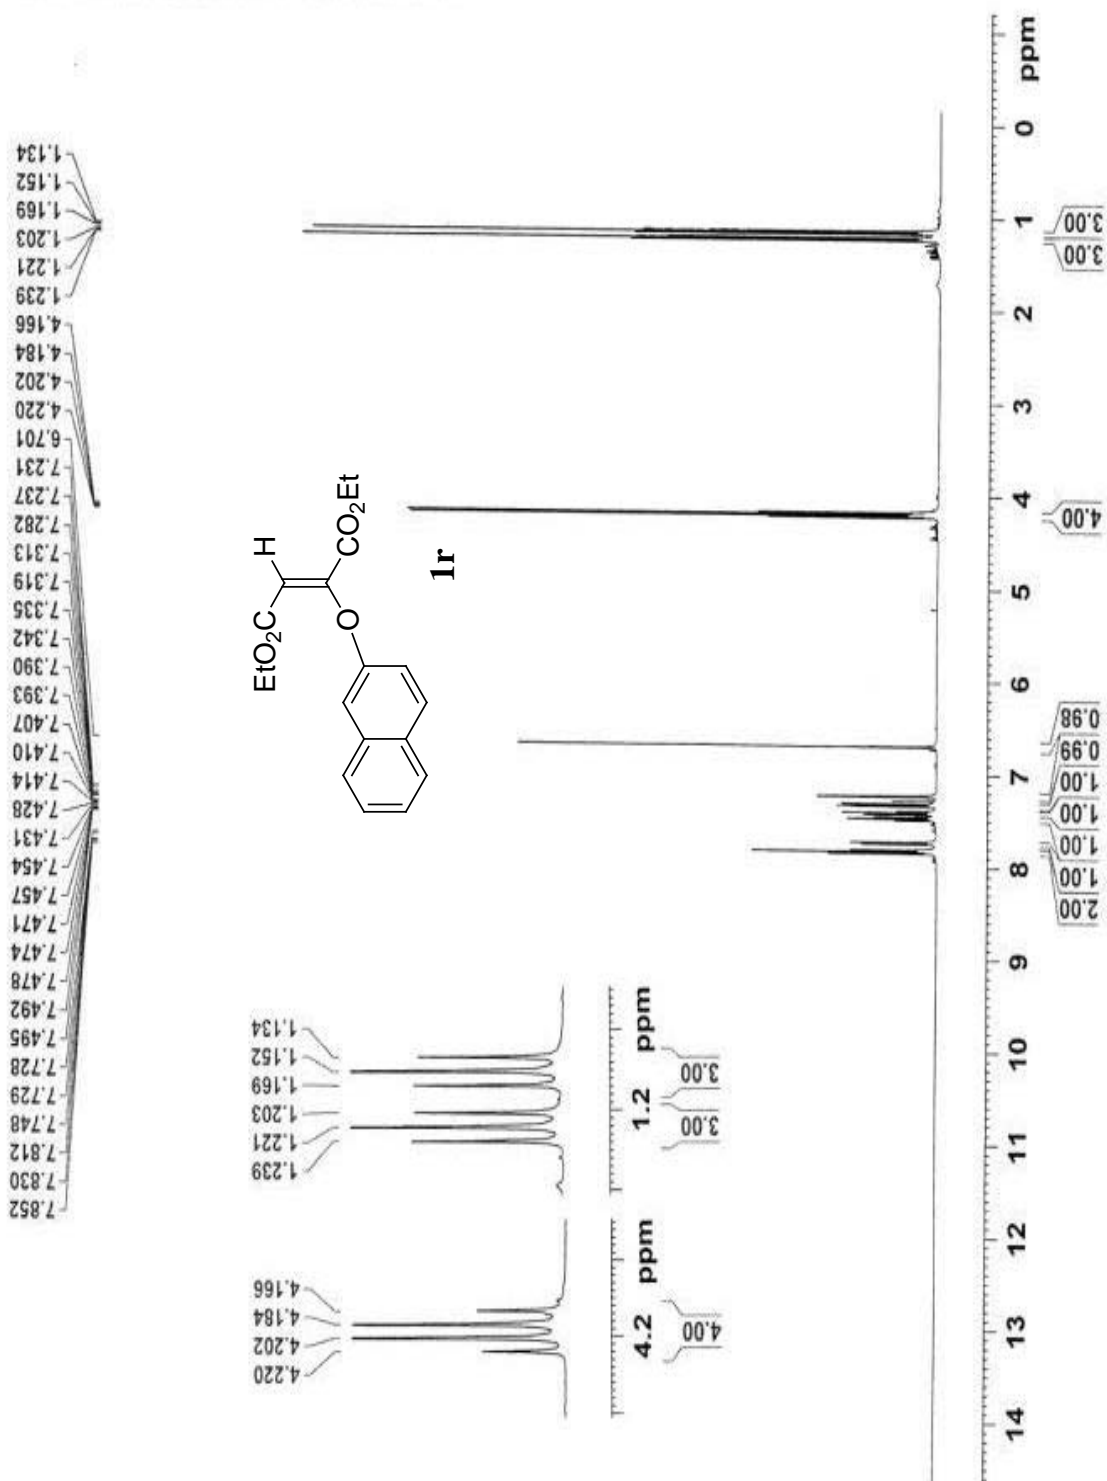

Supplementary Data

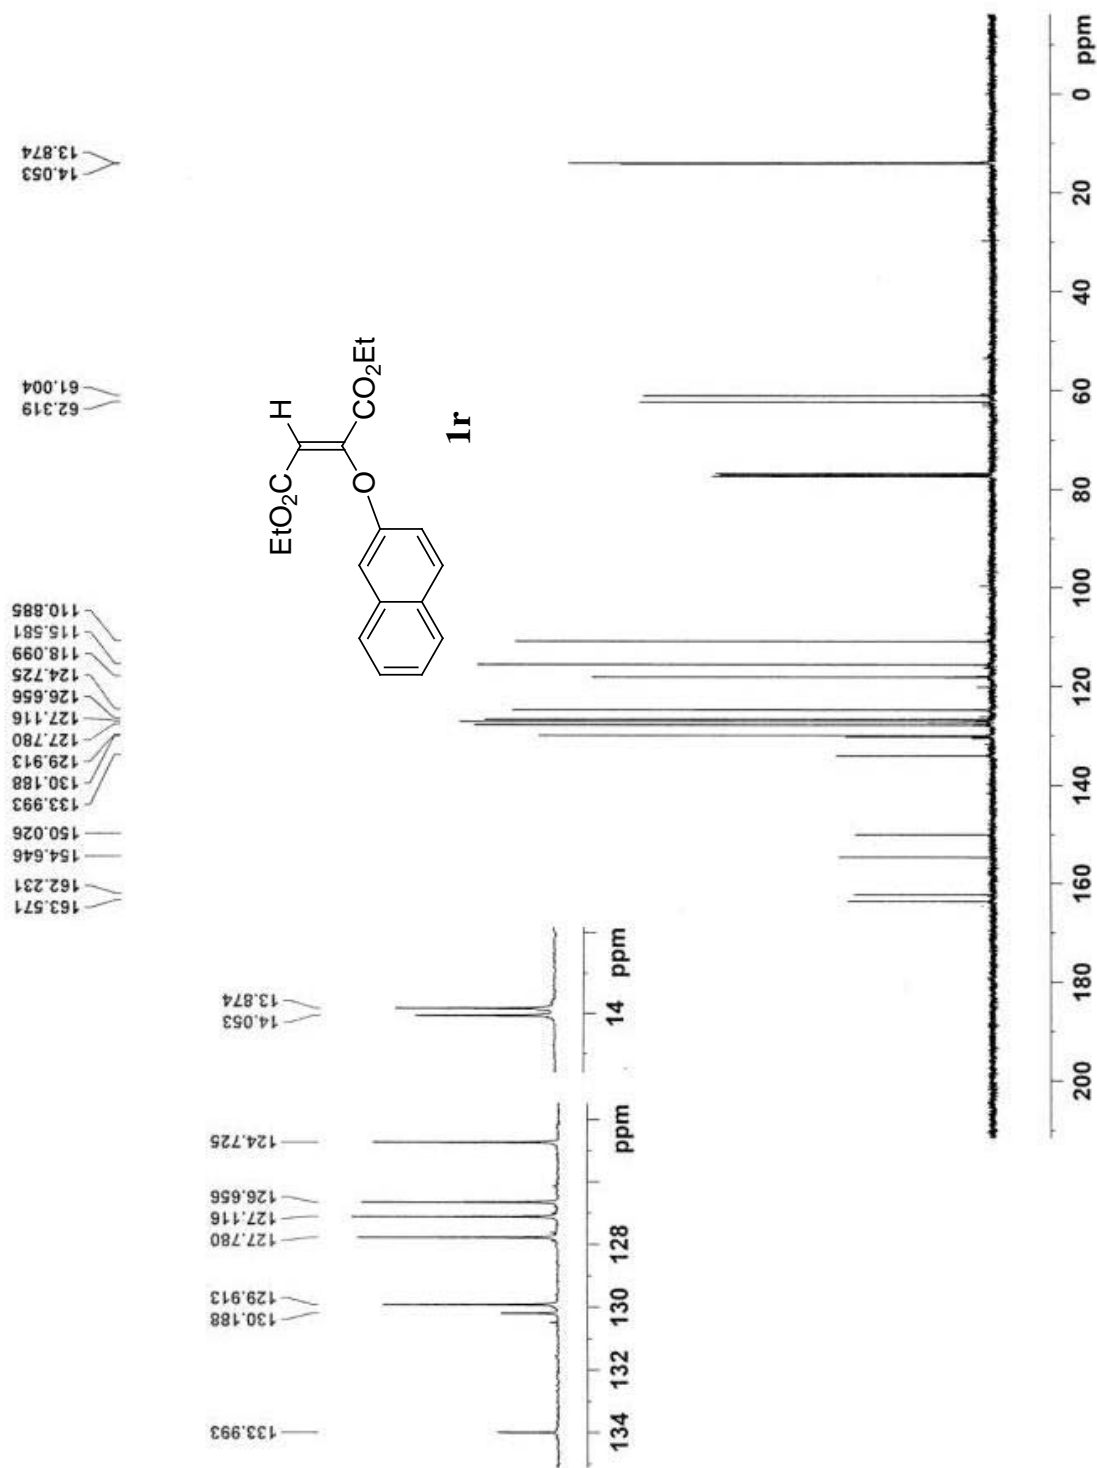

Supplementary Data

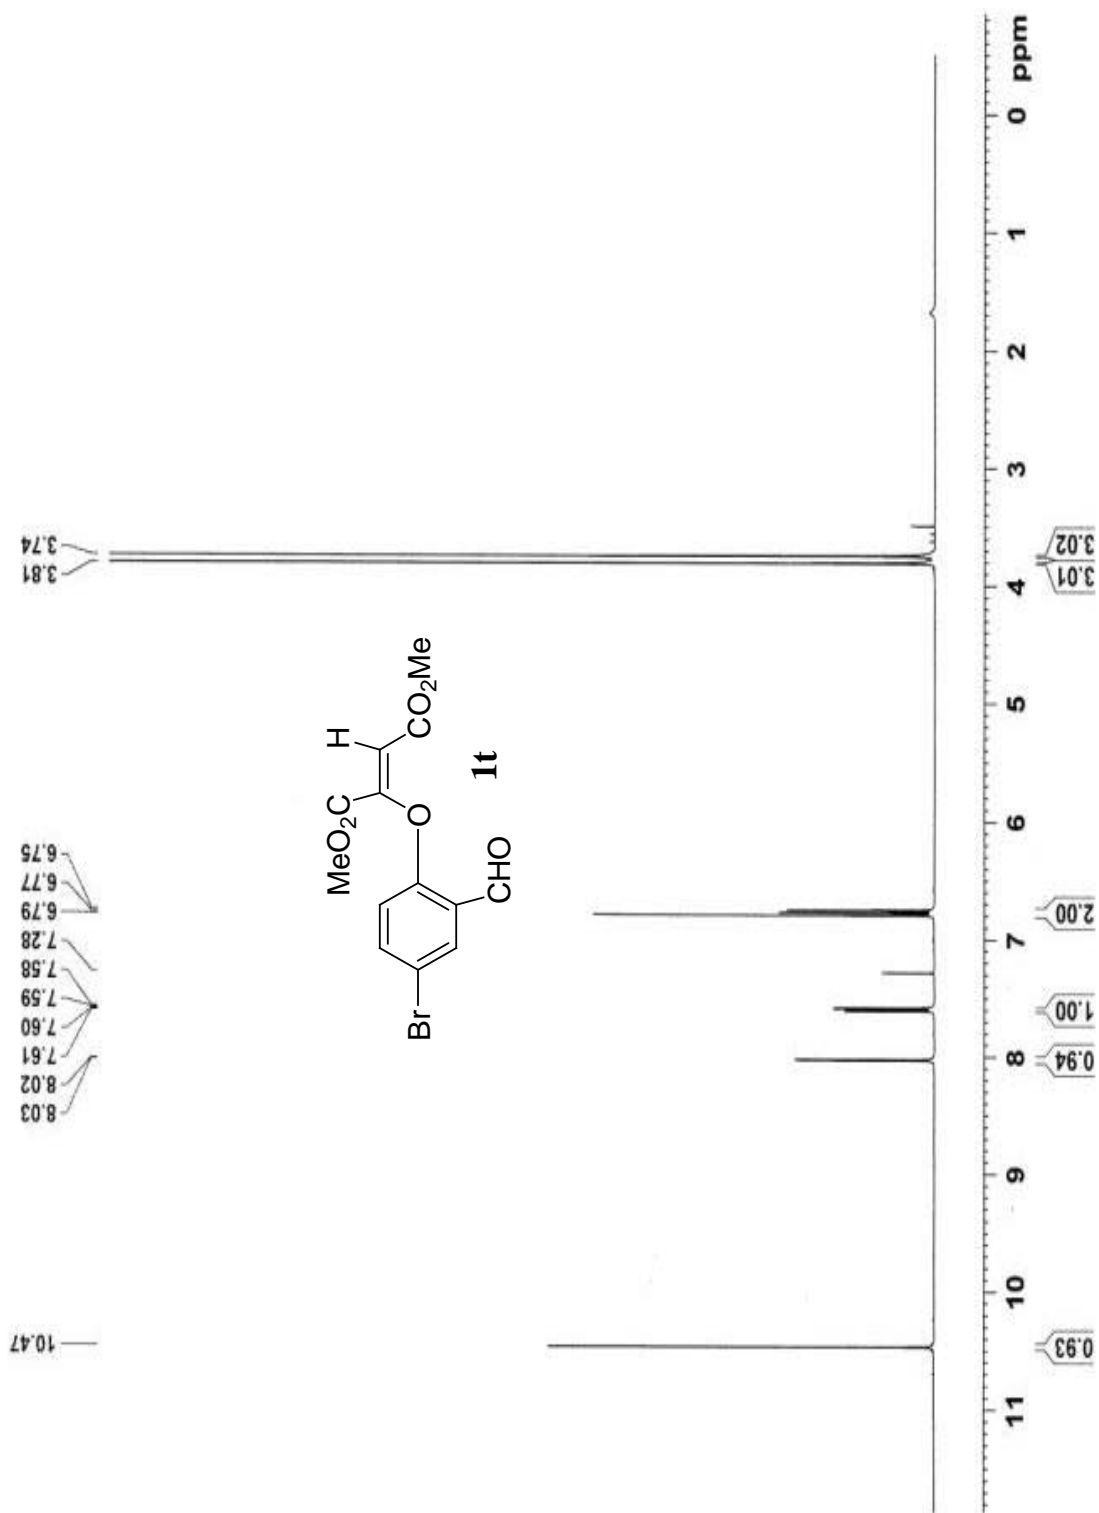

Supplementary Data

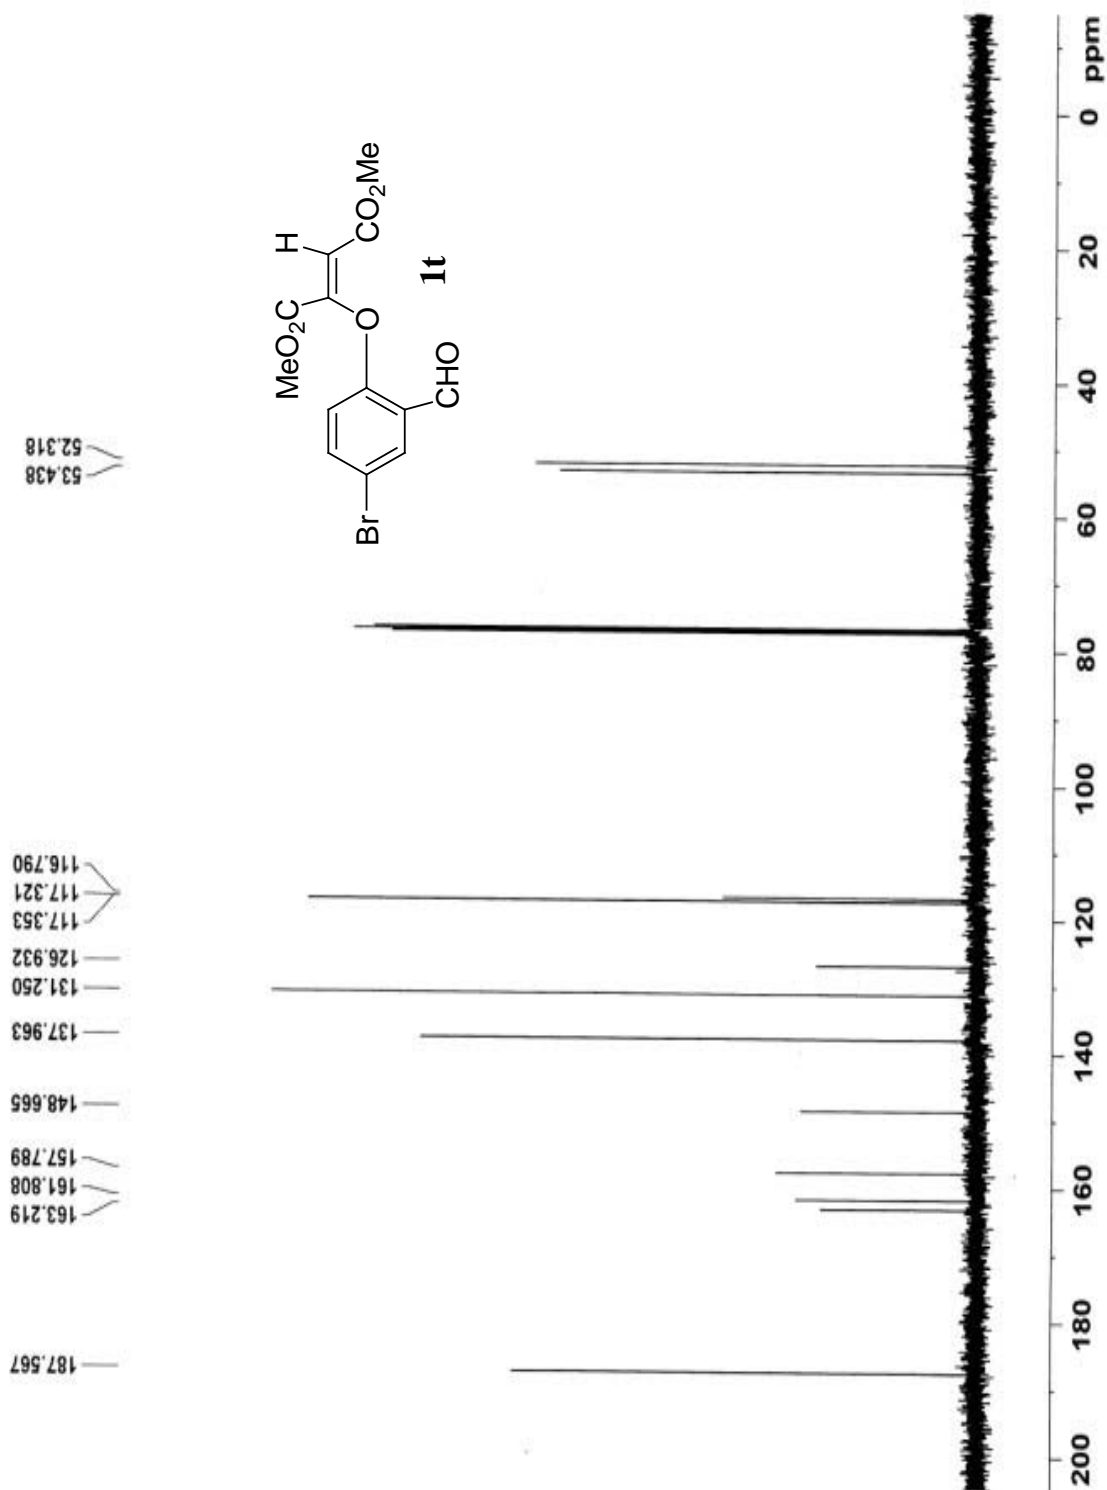



Supplementary Data

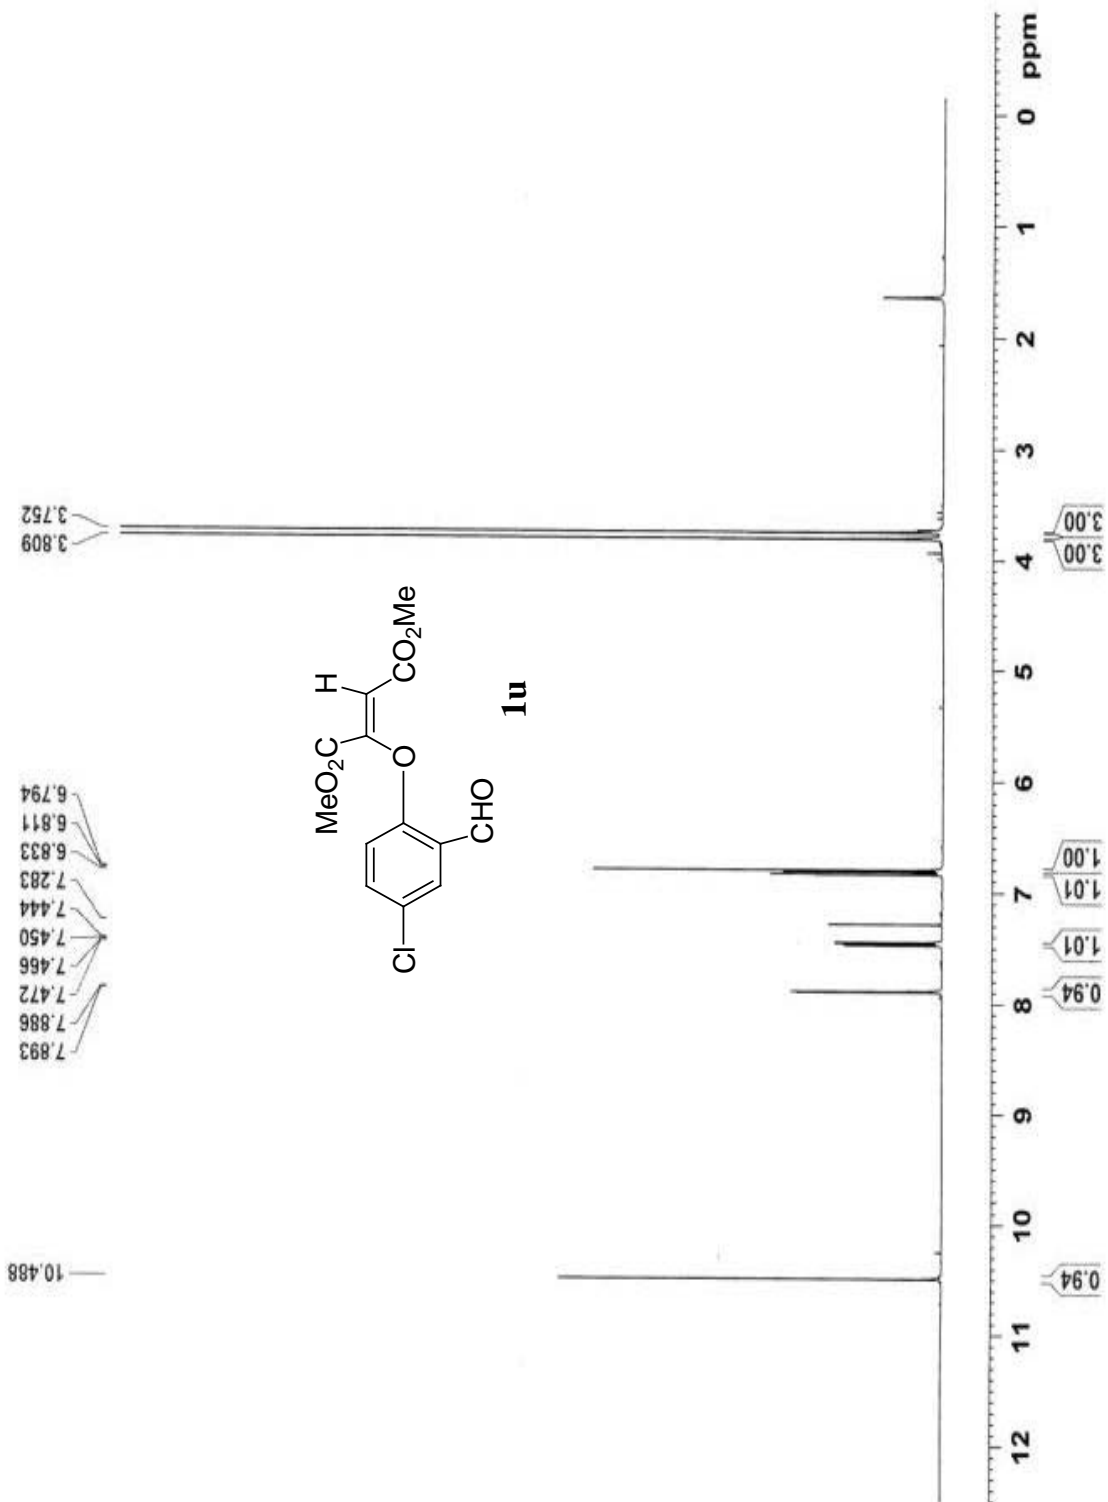

Supplementary Data

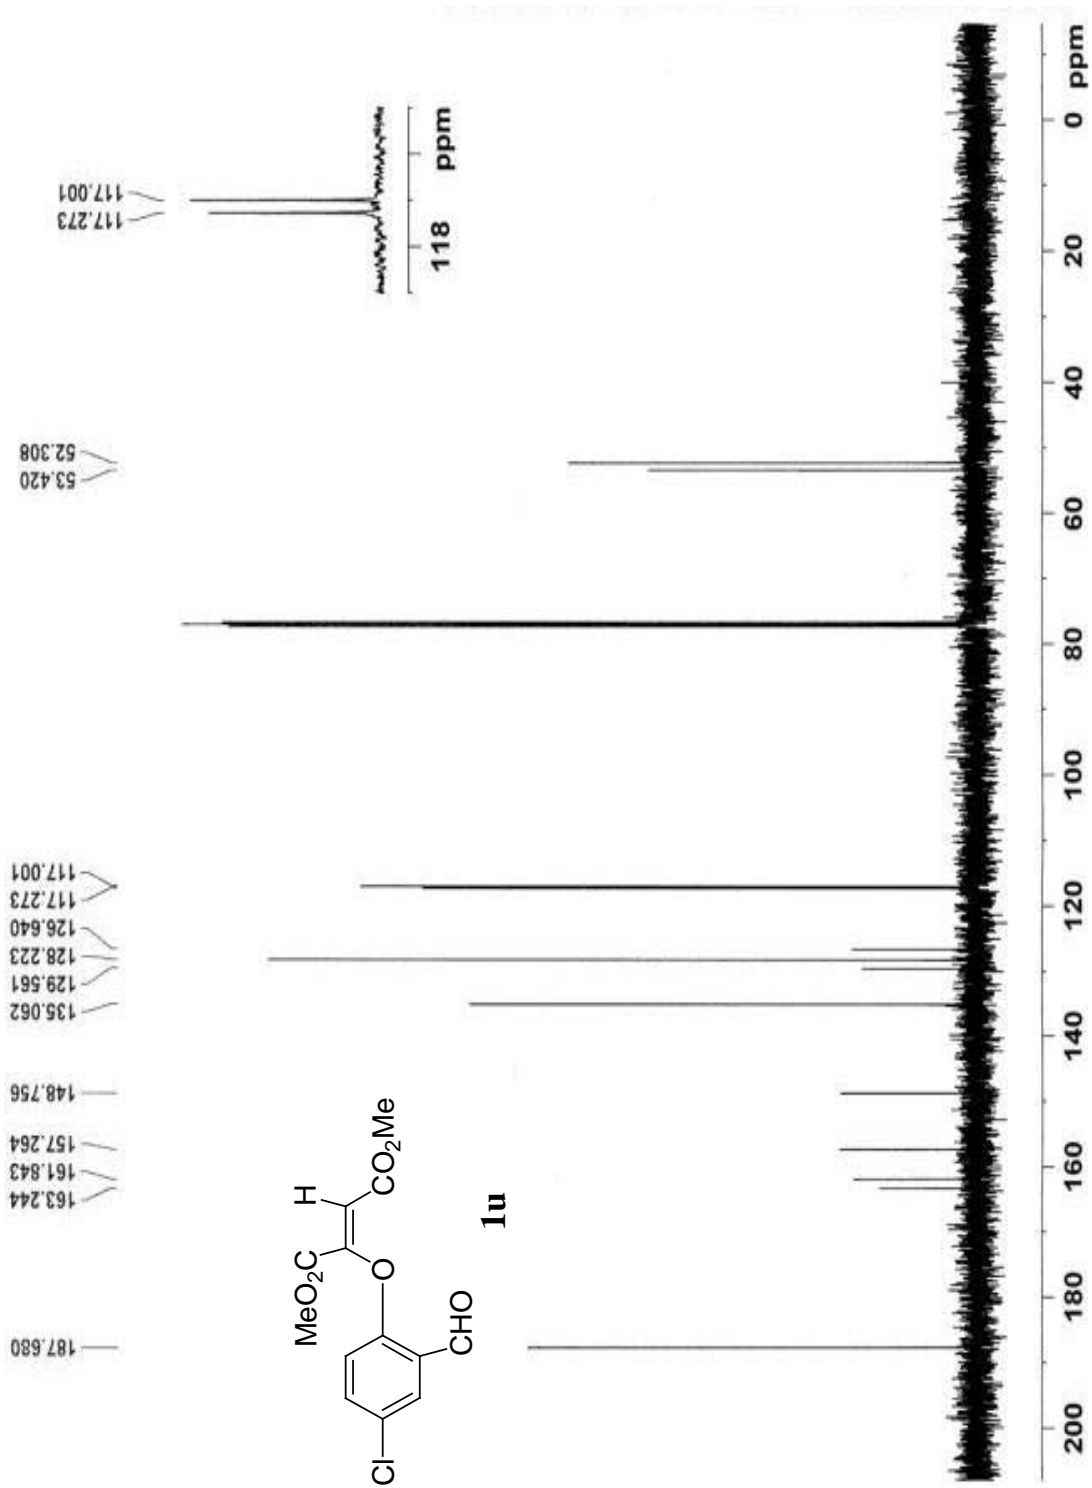

Supplementary Data

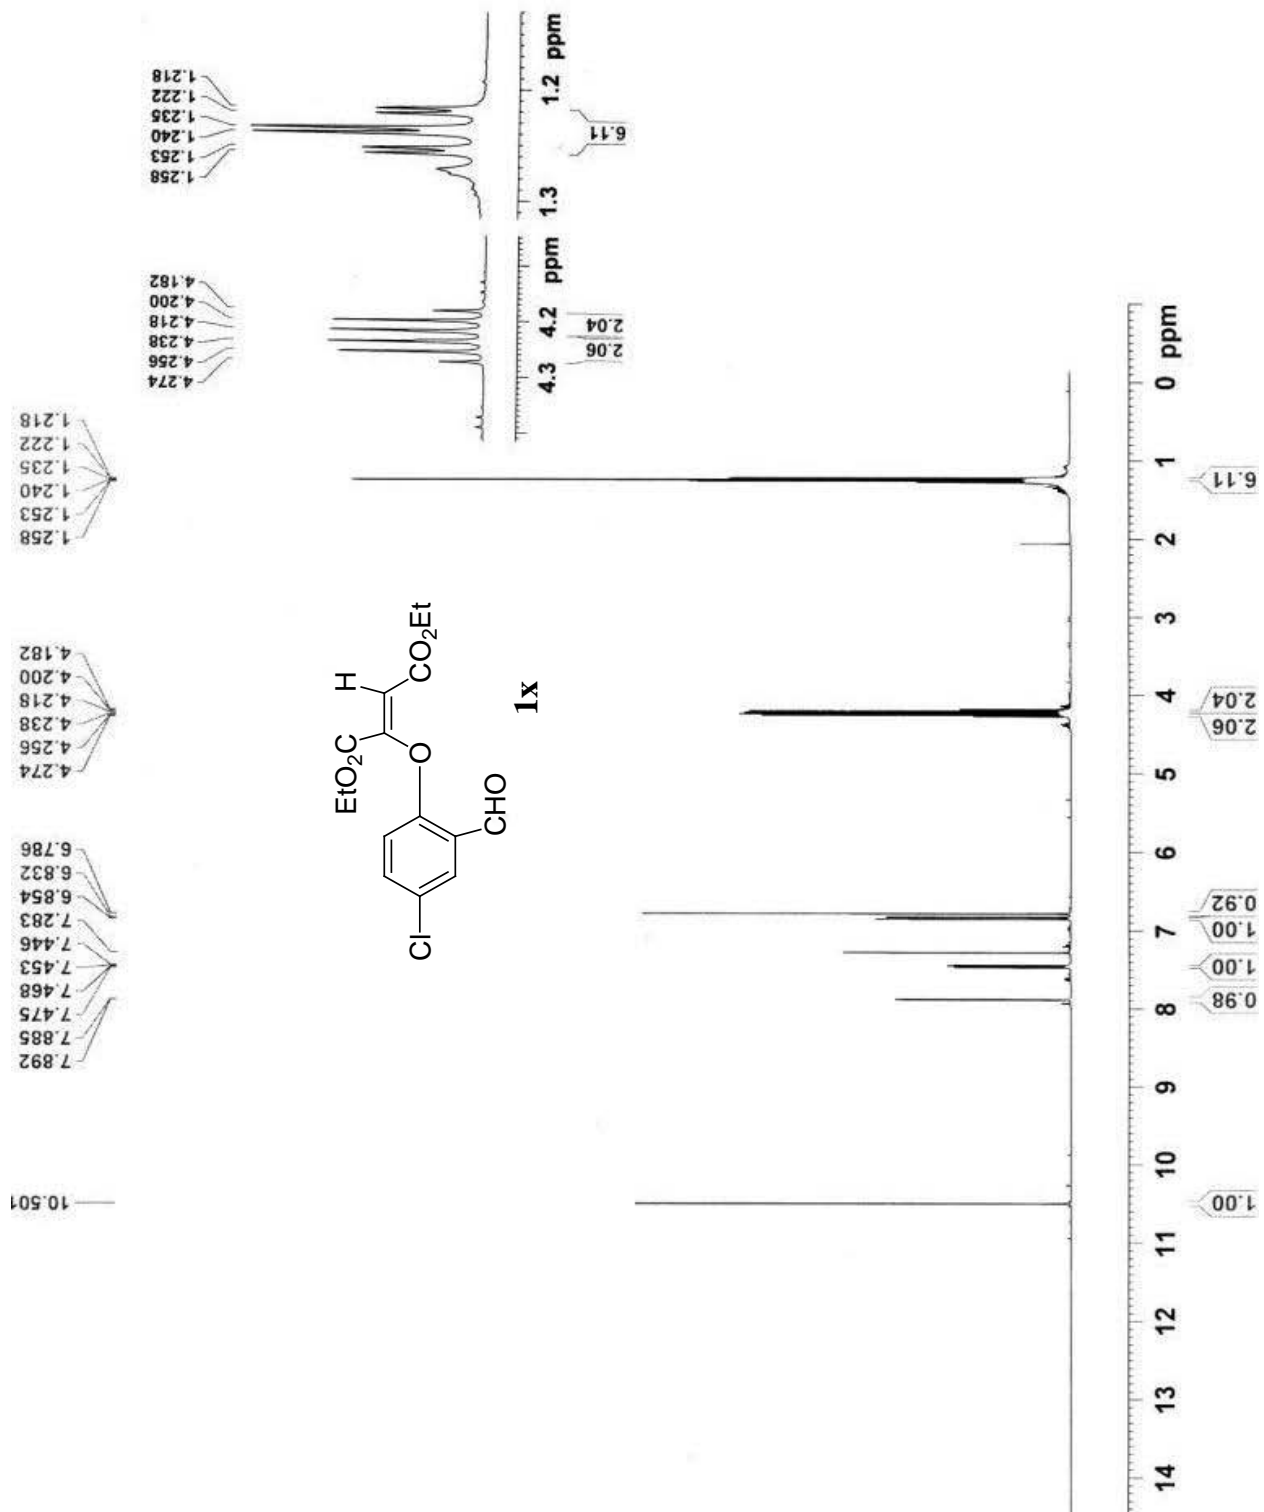

Supplementary Data

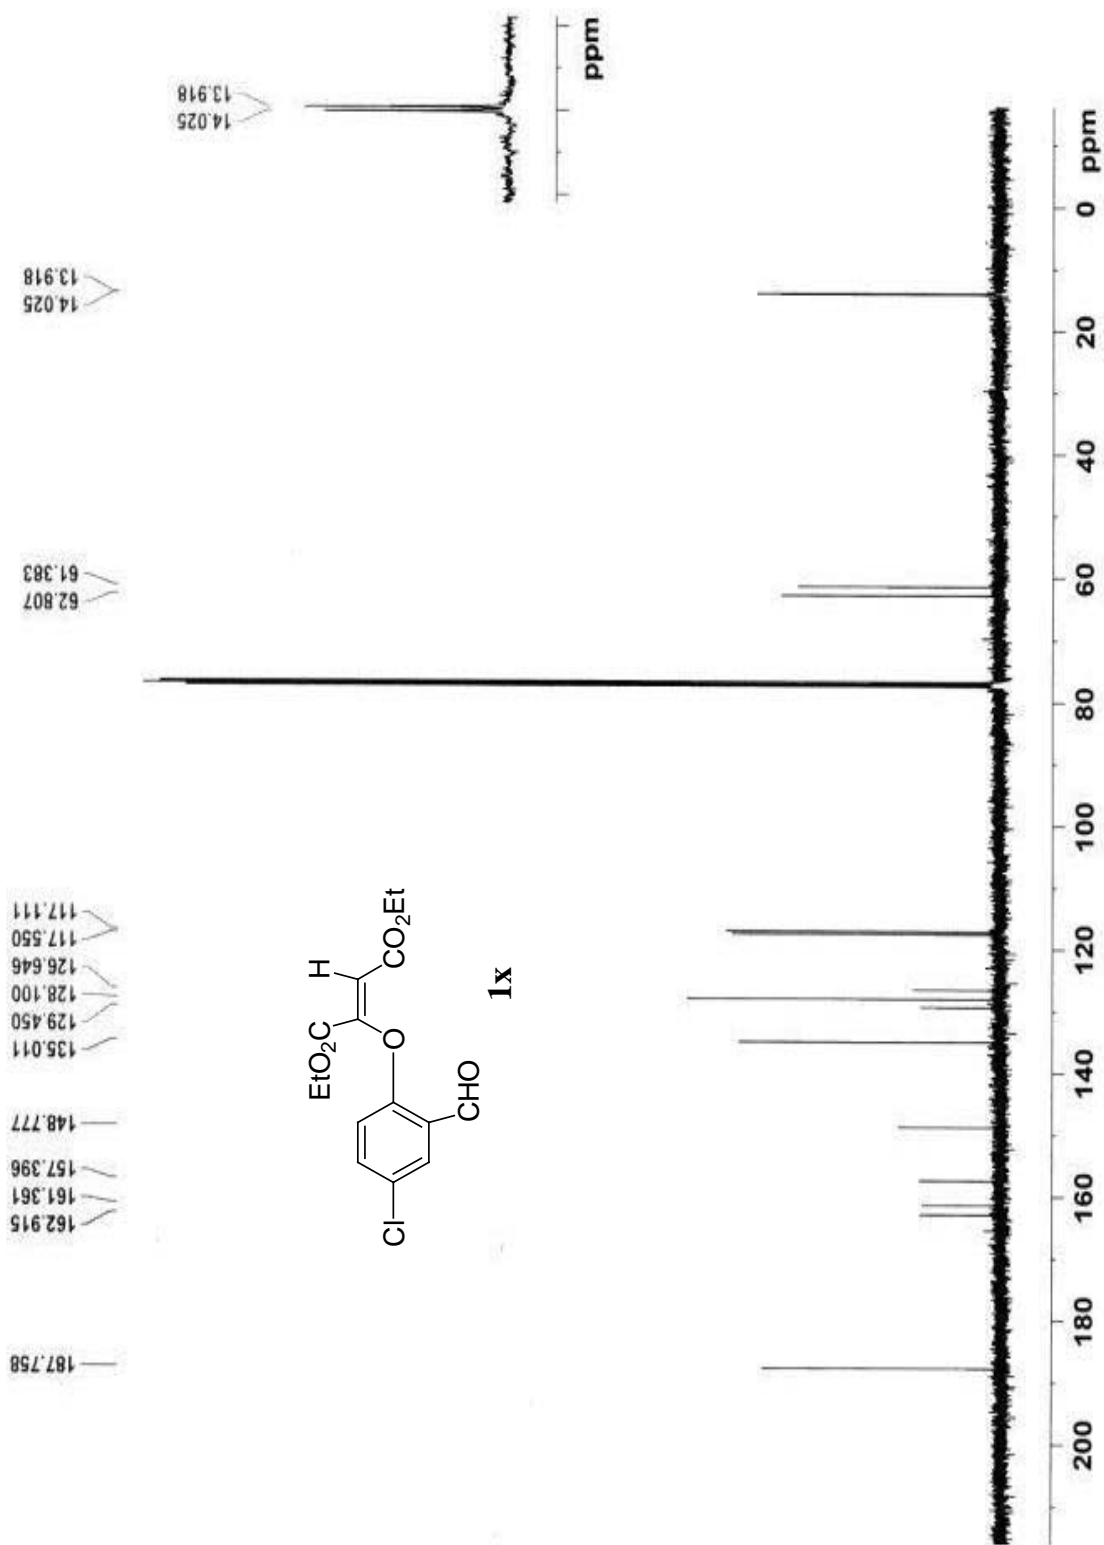

Supplementary Data

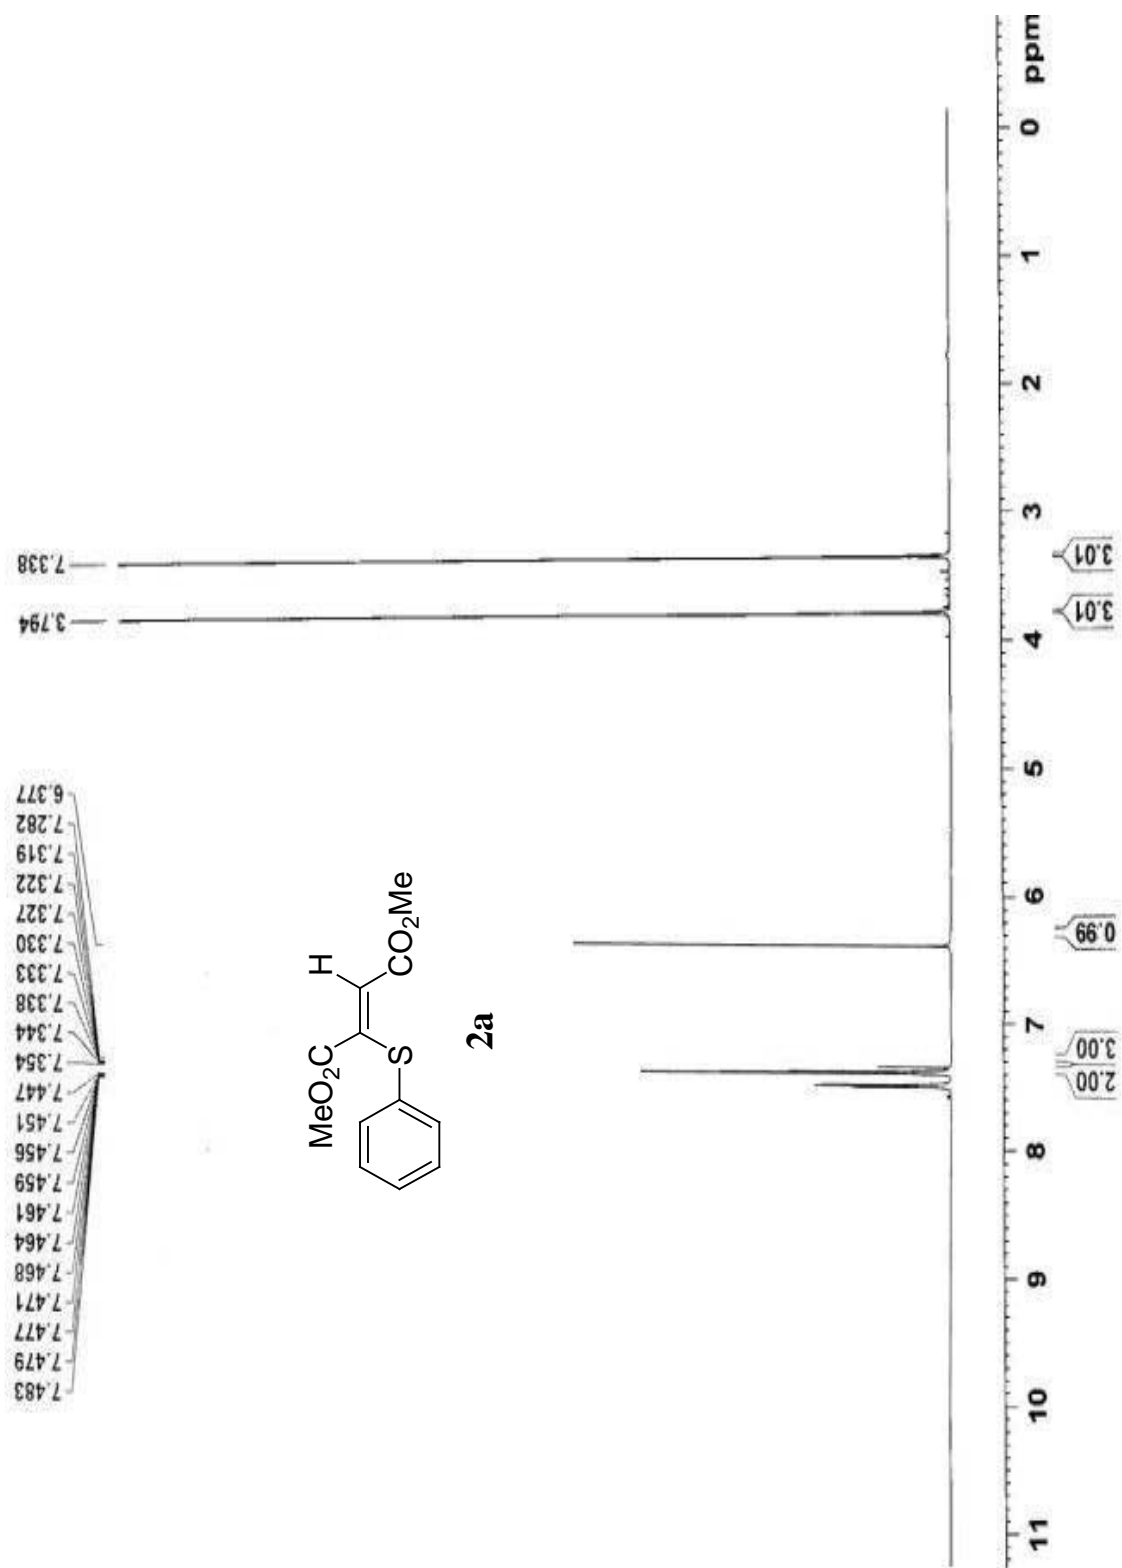

Supplementary Data

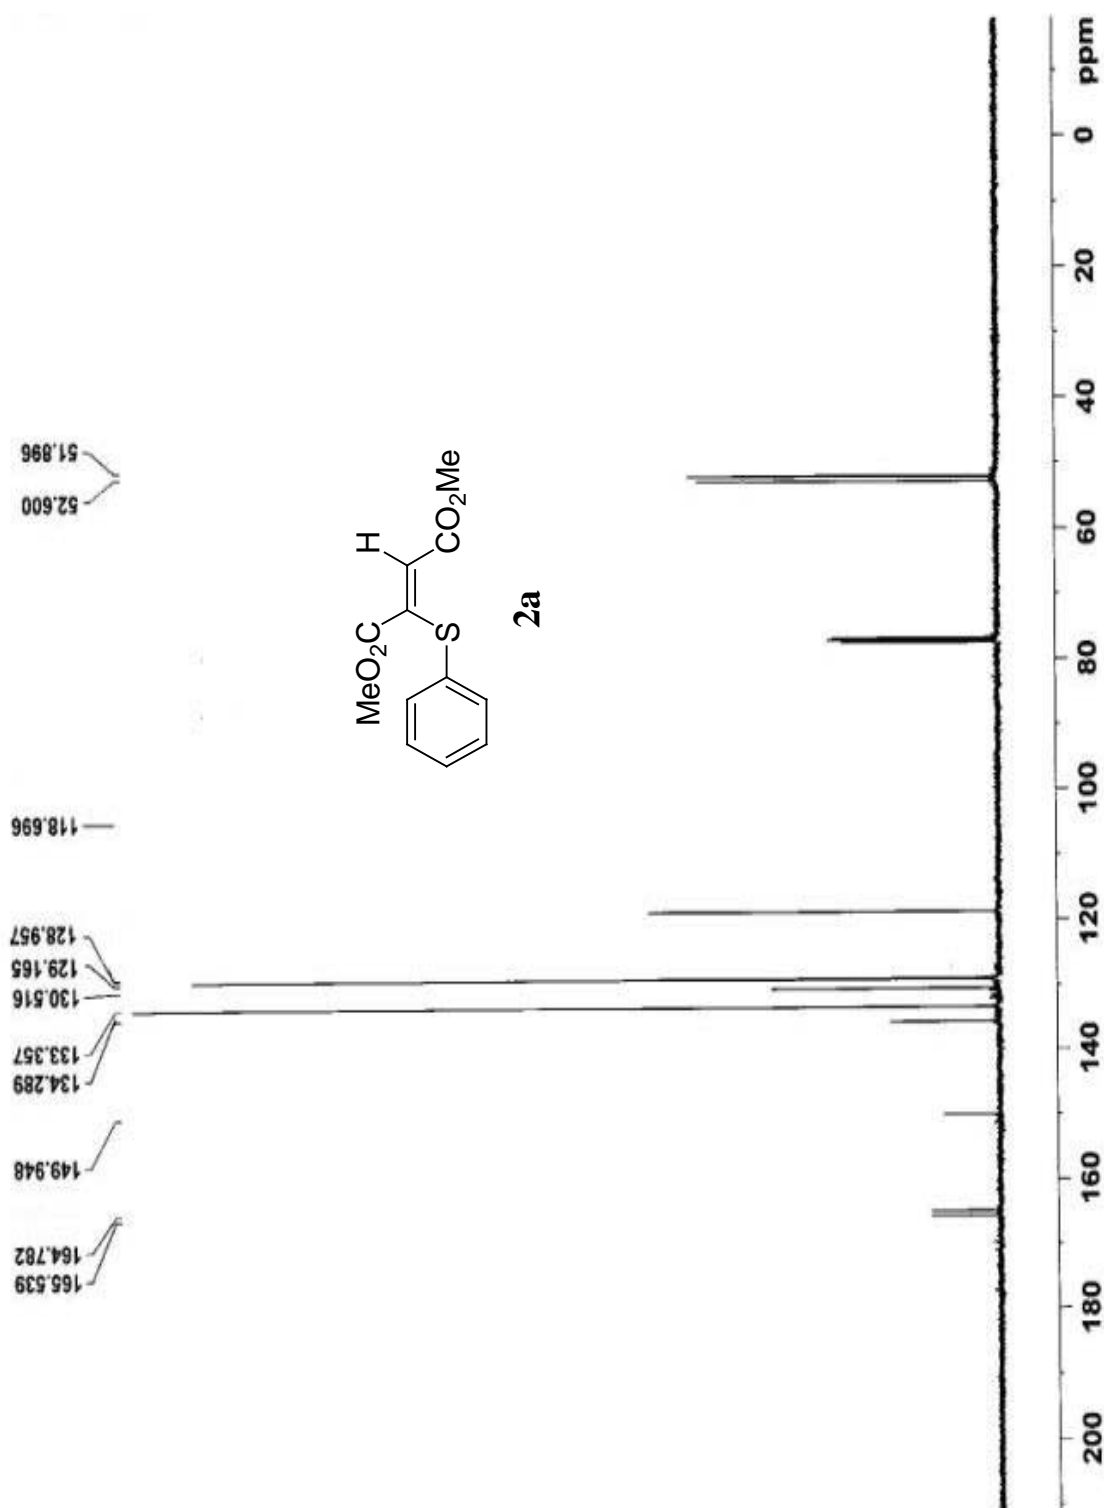

Supplementary Data

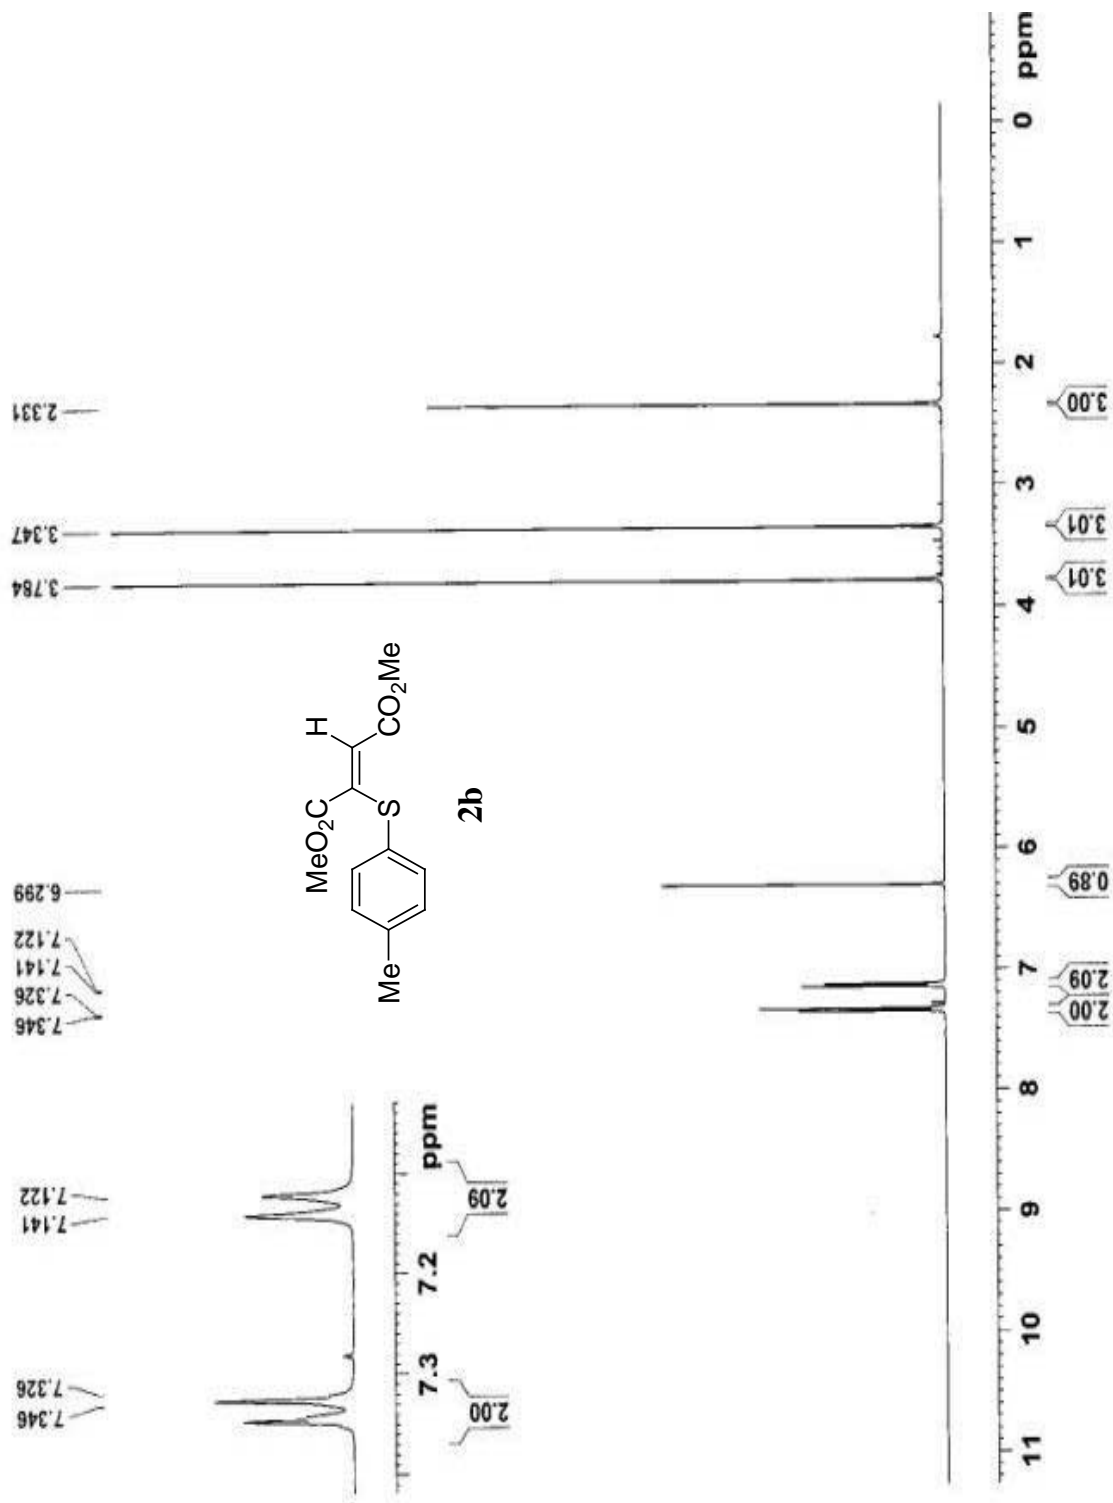

Supplementary Data

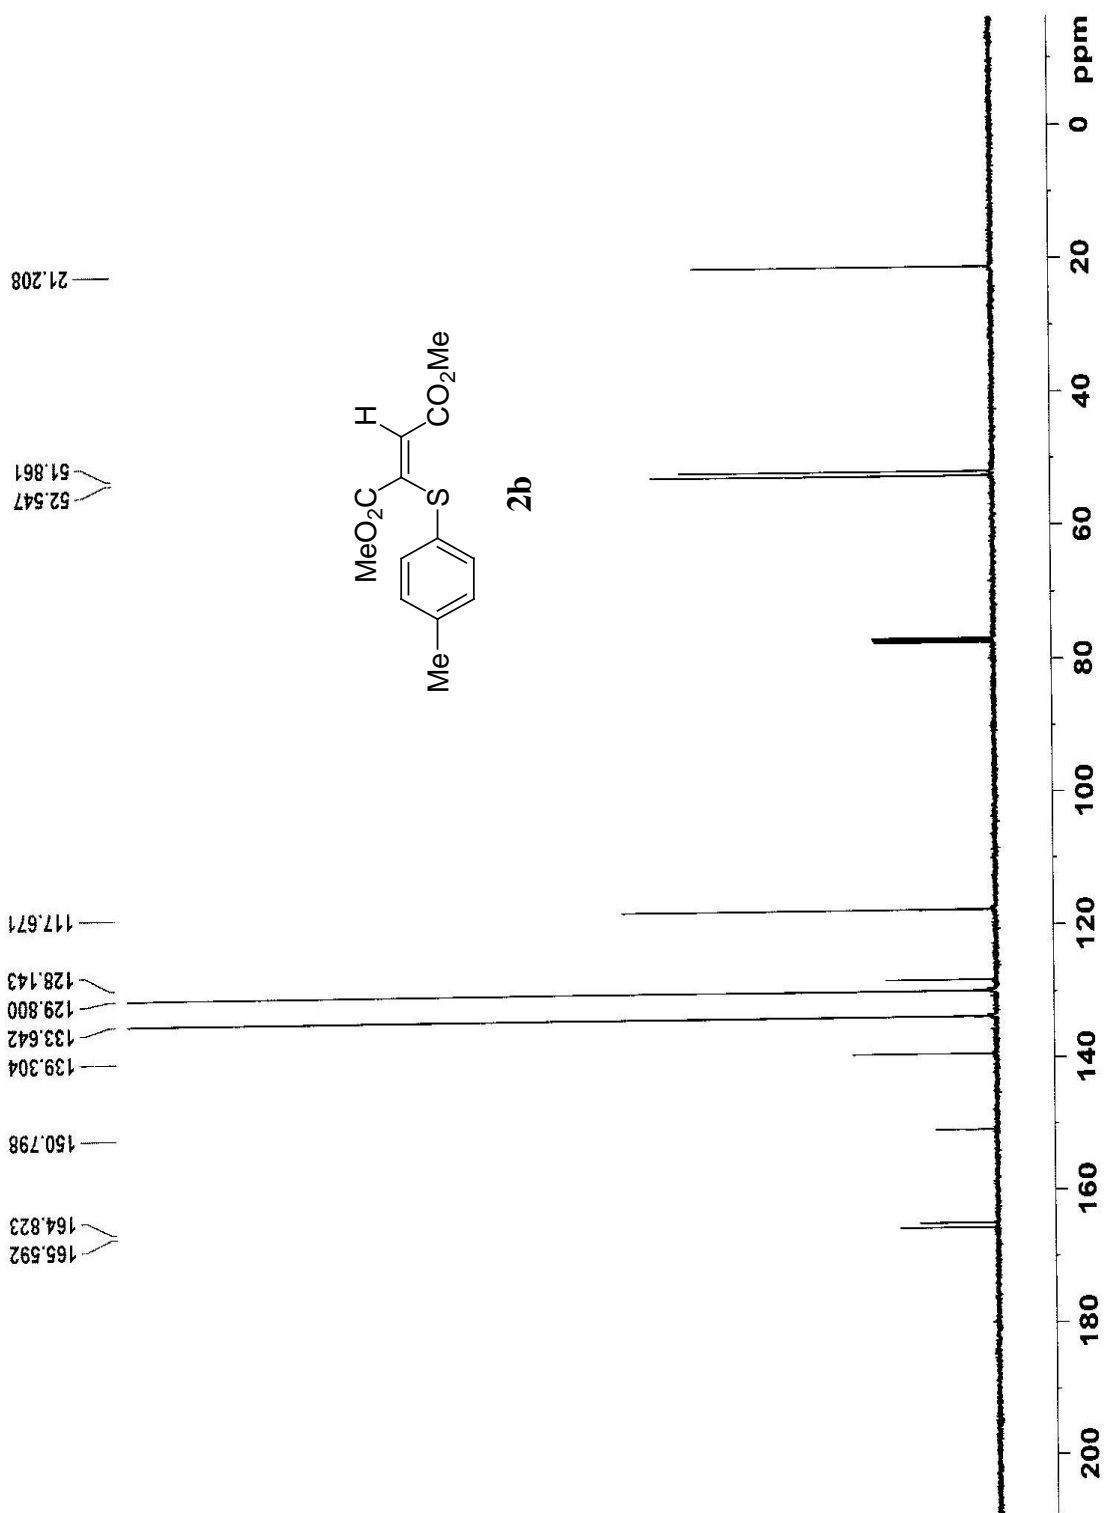



Supplementary Data

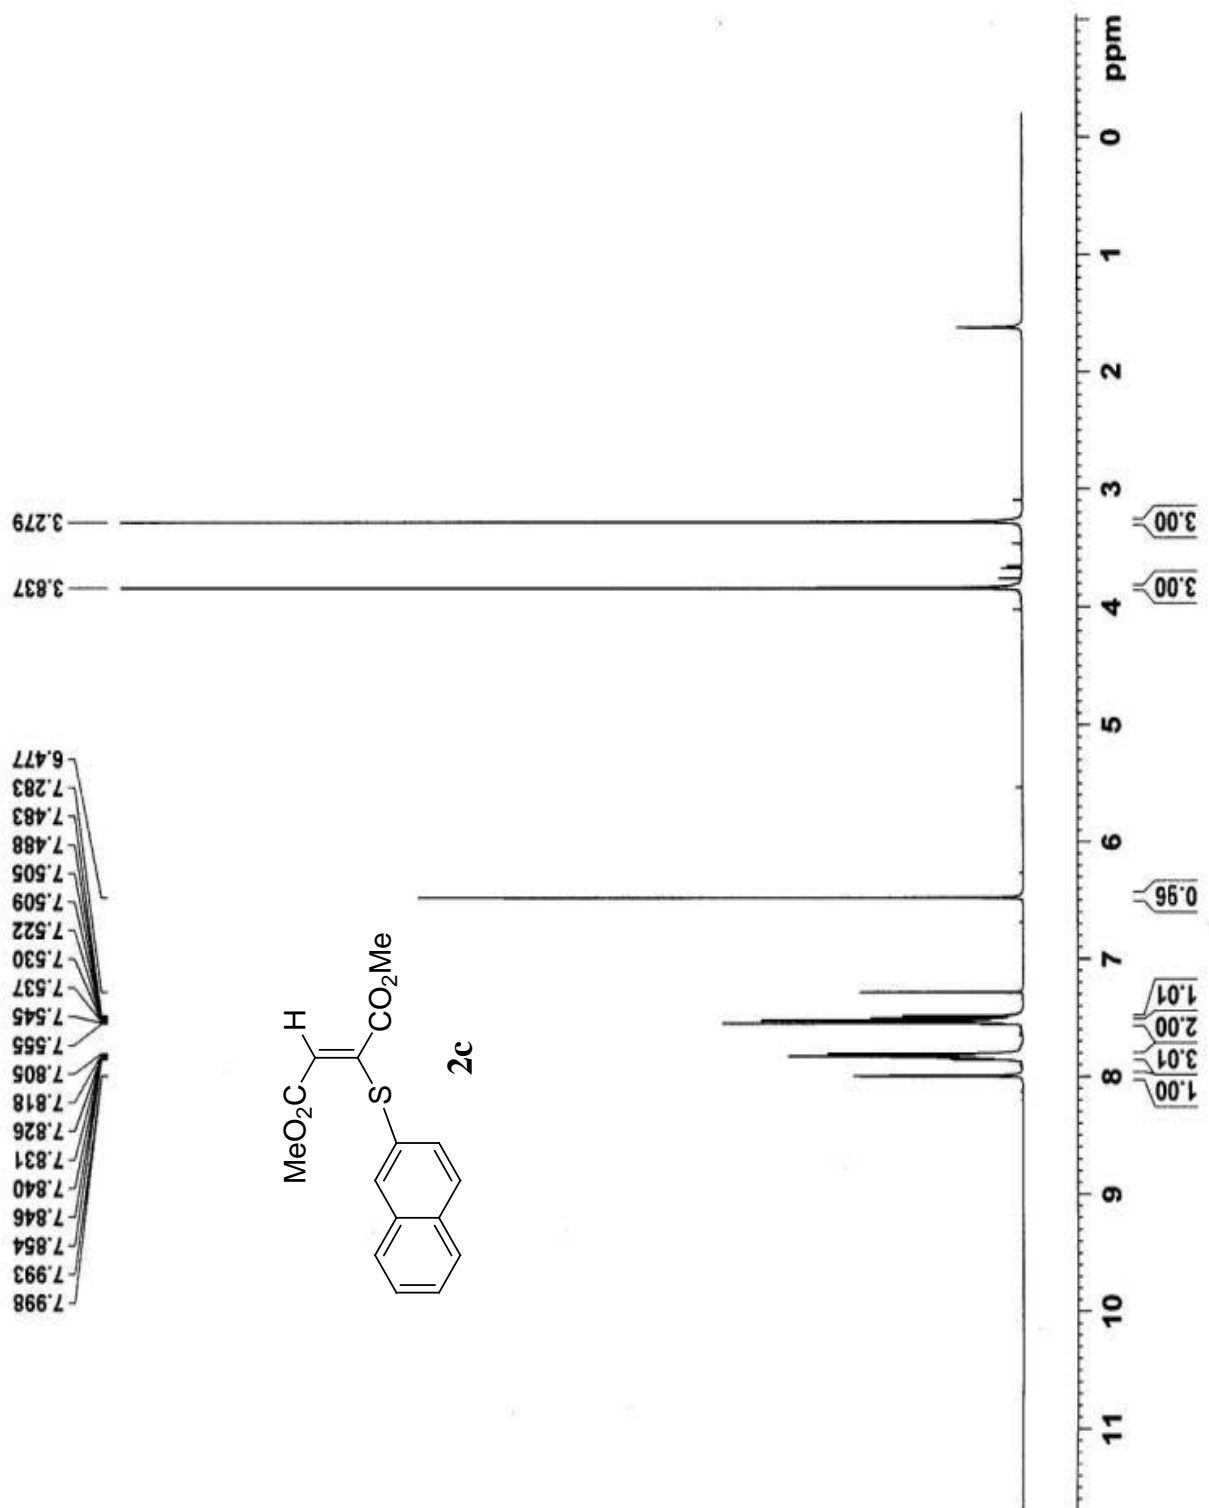

Supplementary Data

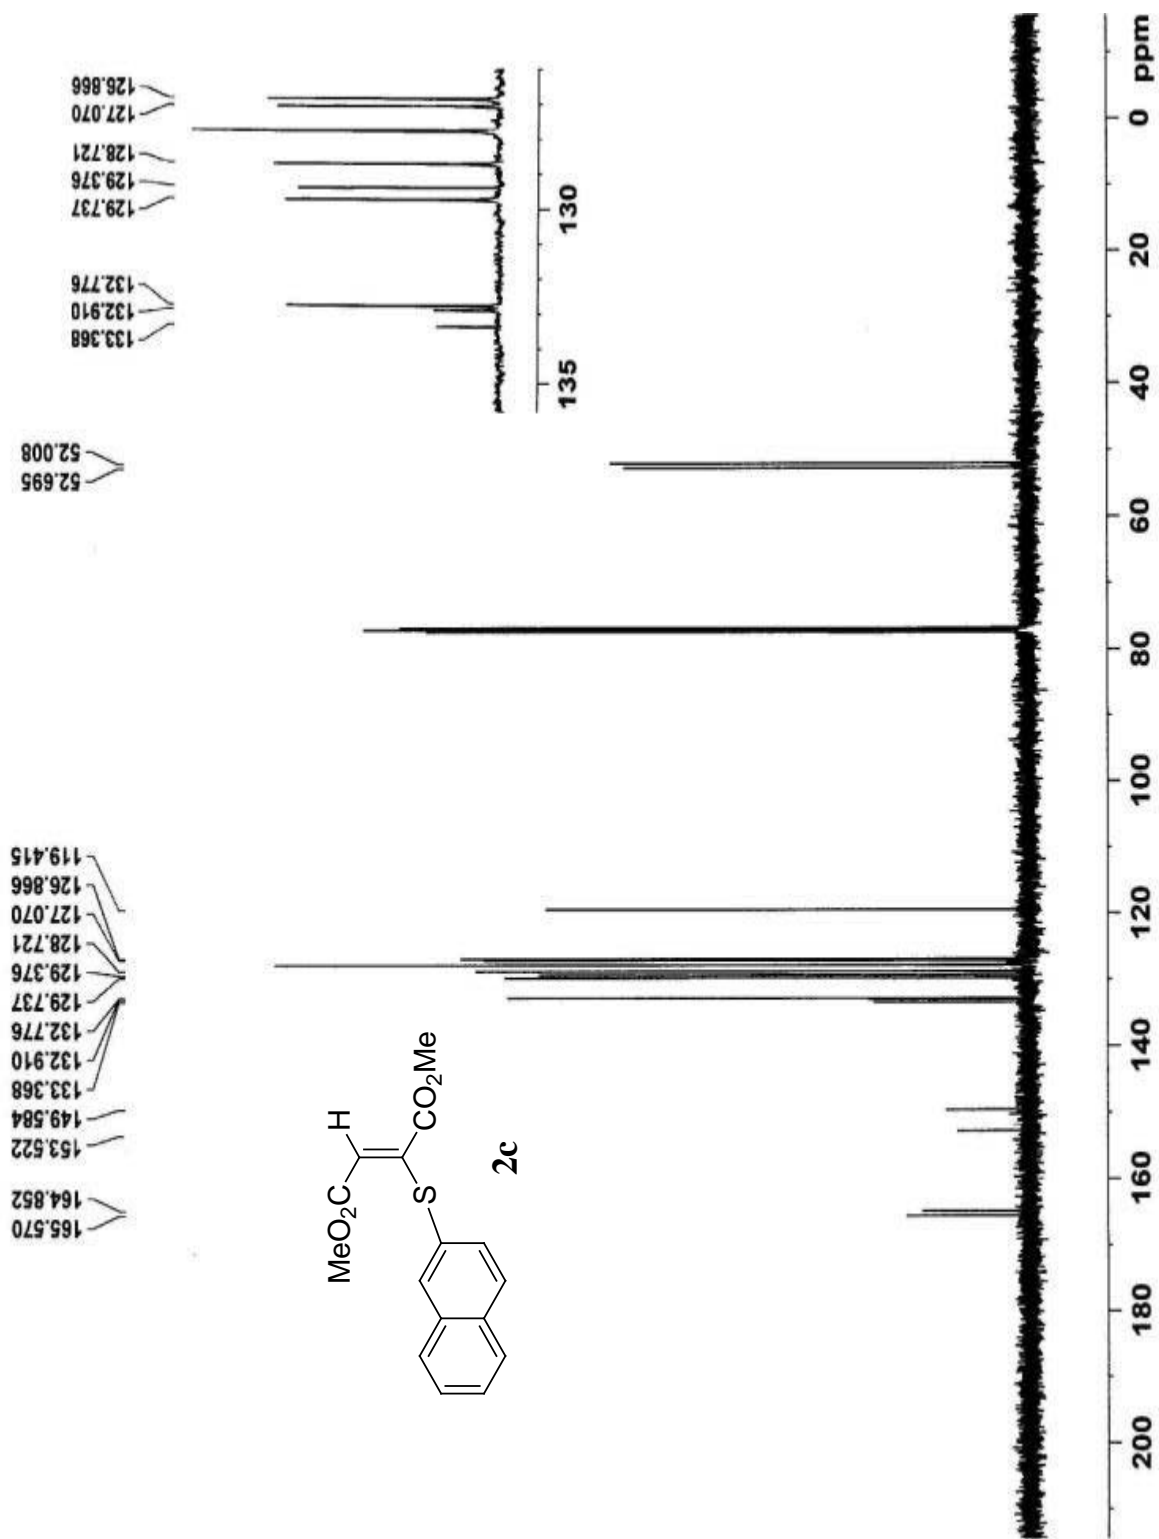

Supplementary Data

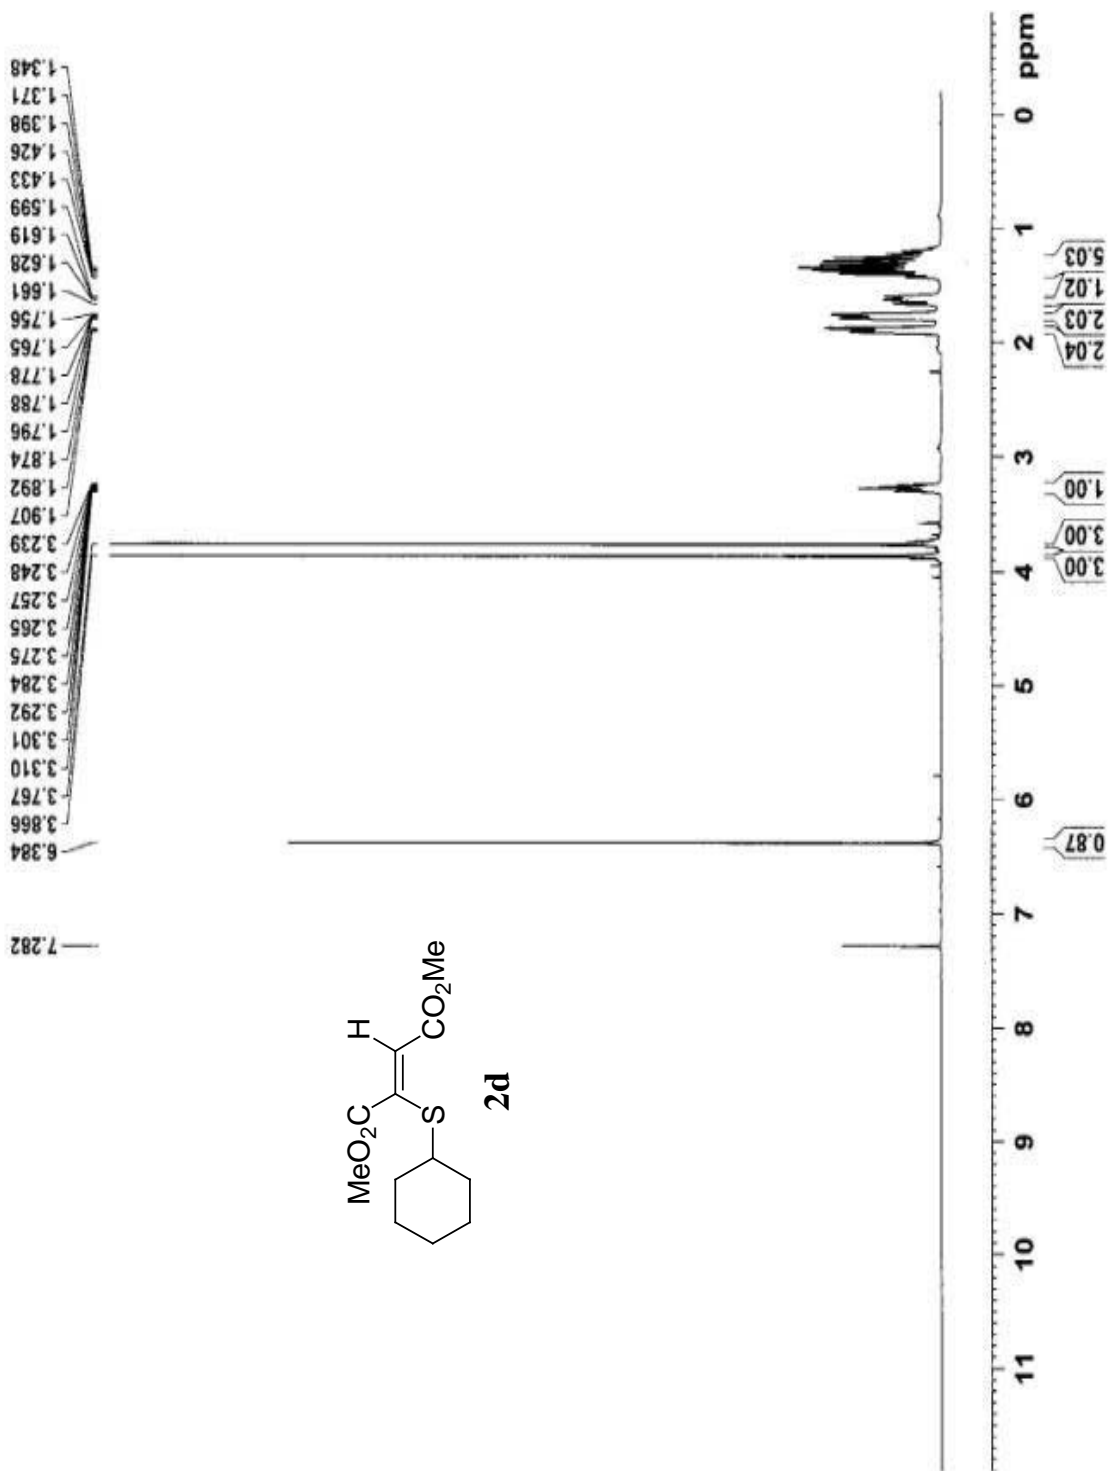

Supplementary Data

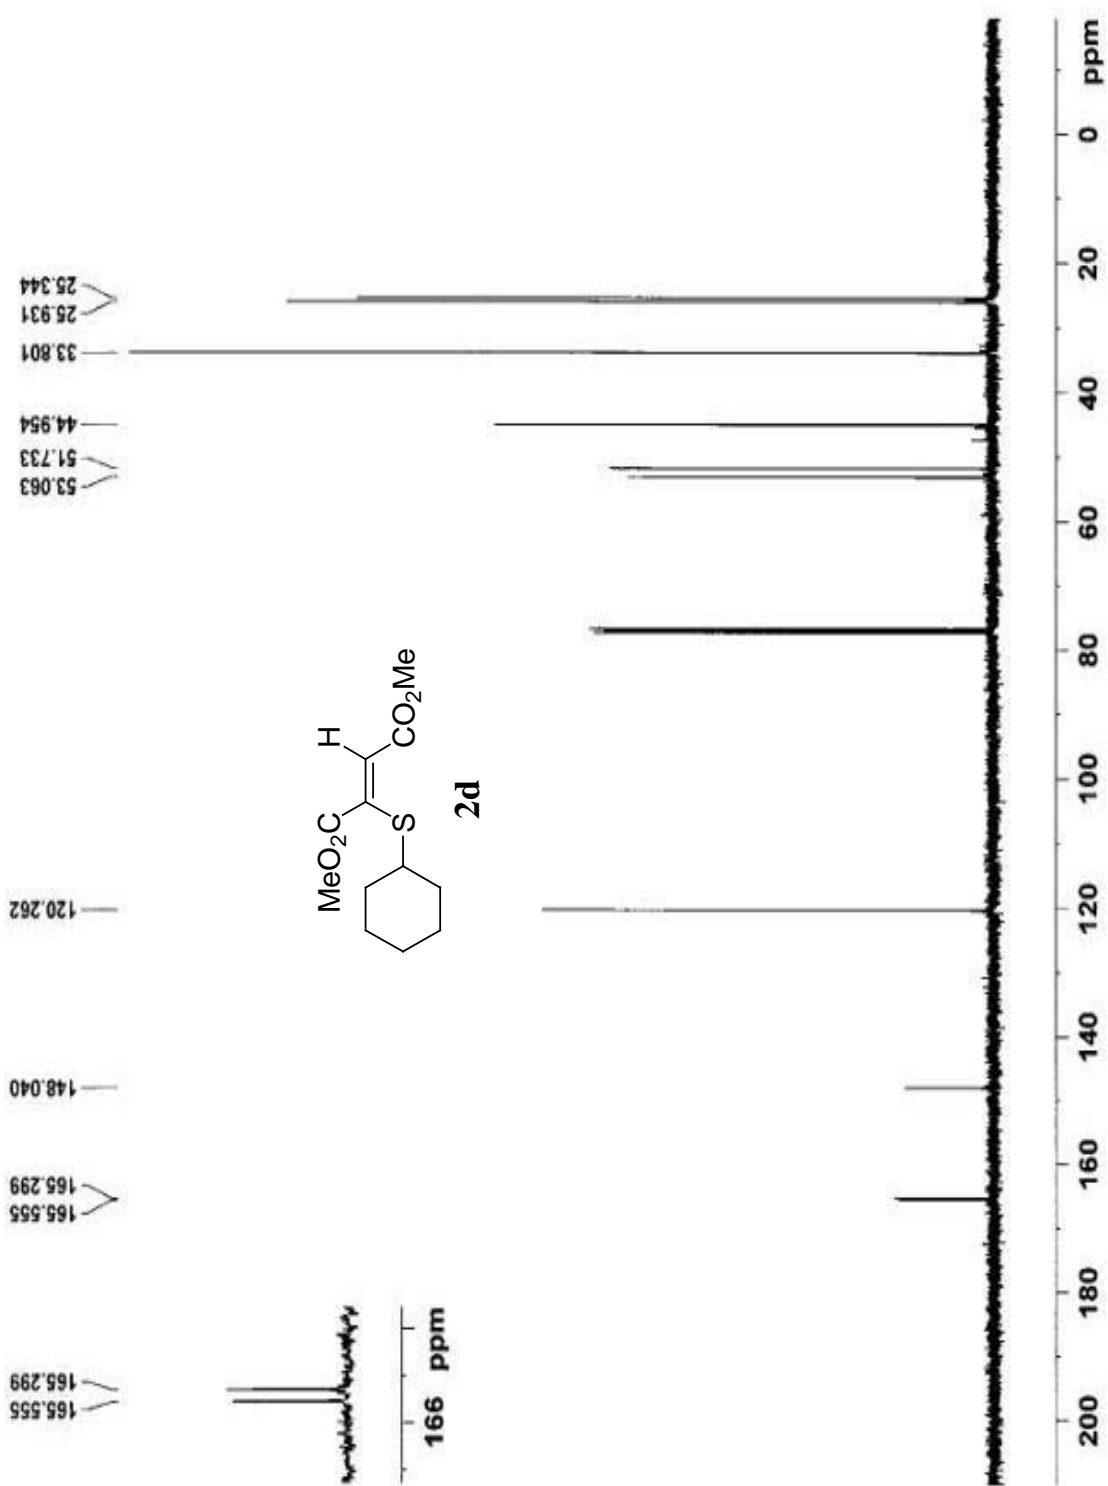

Supplementary Data

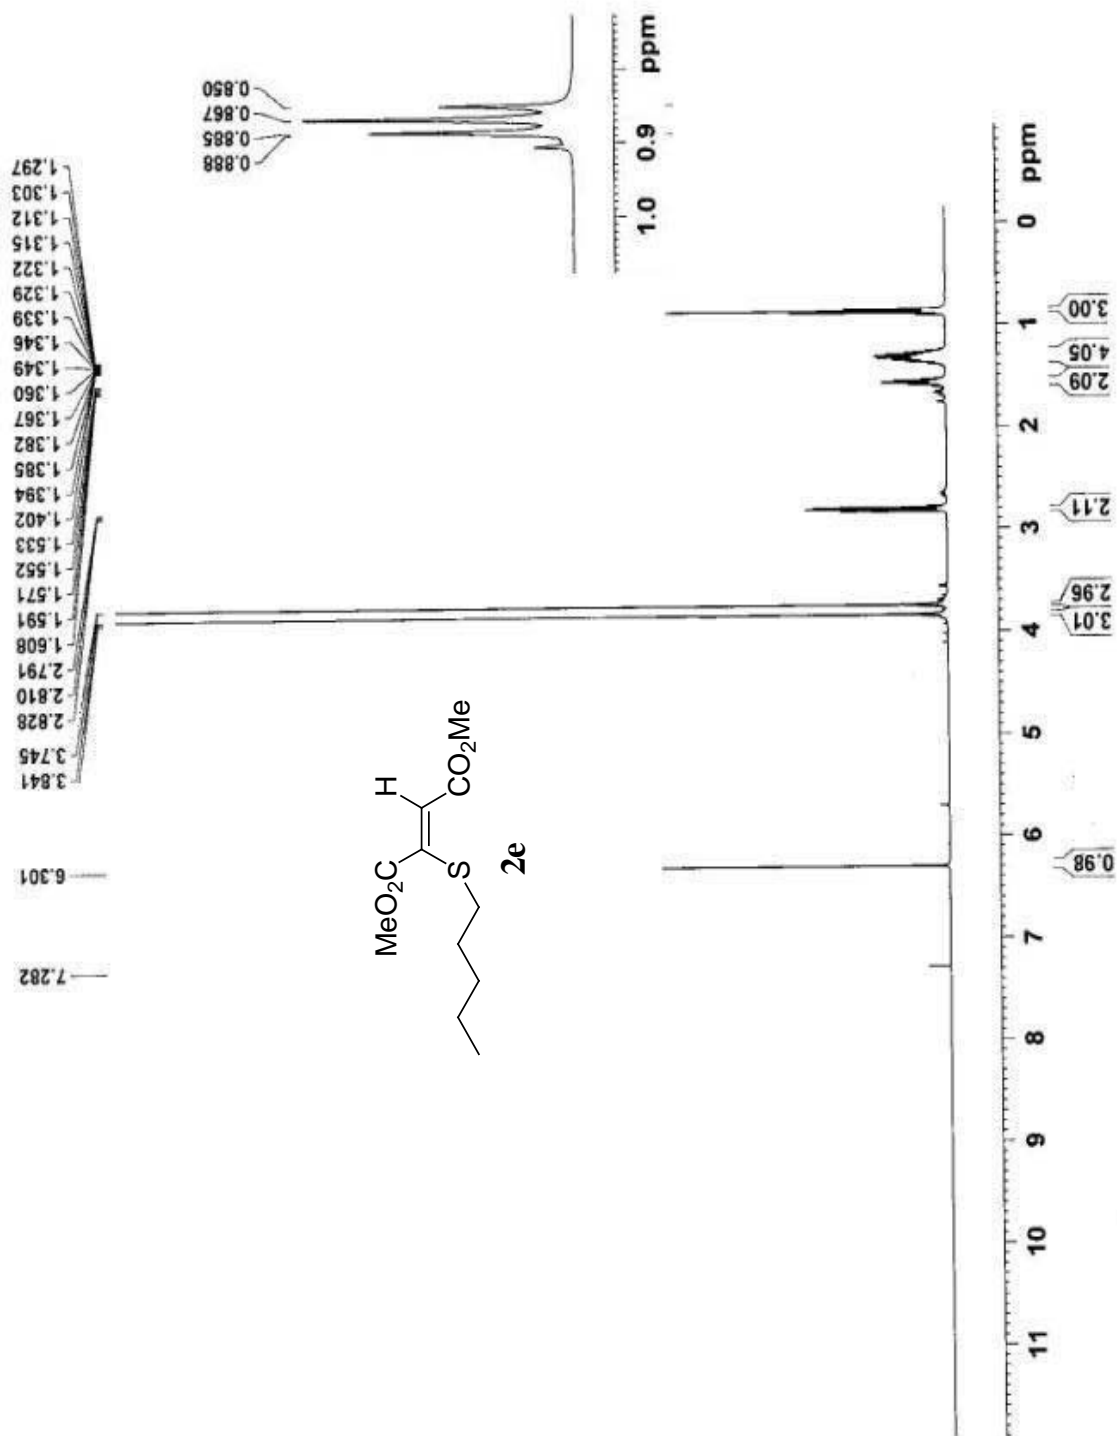

Supplementary Data

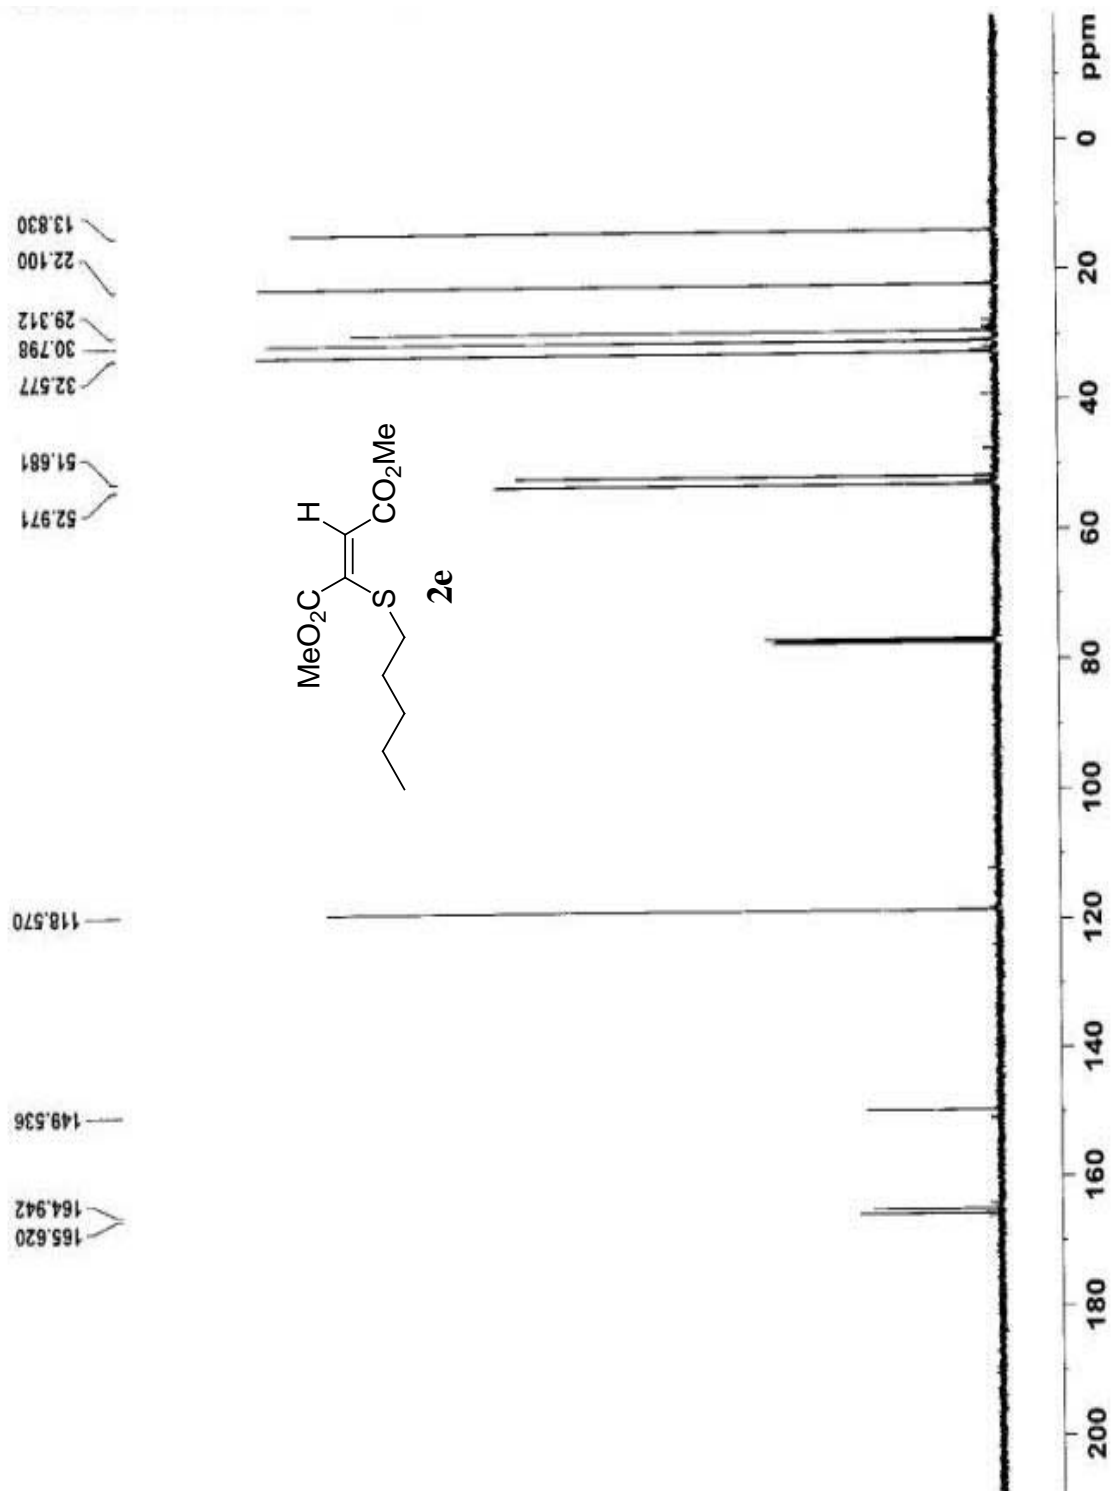

Supplementary Data

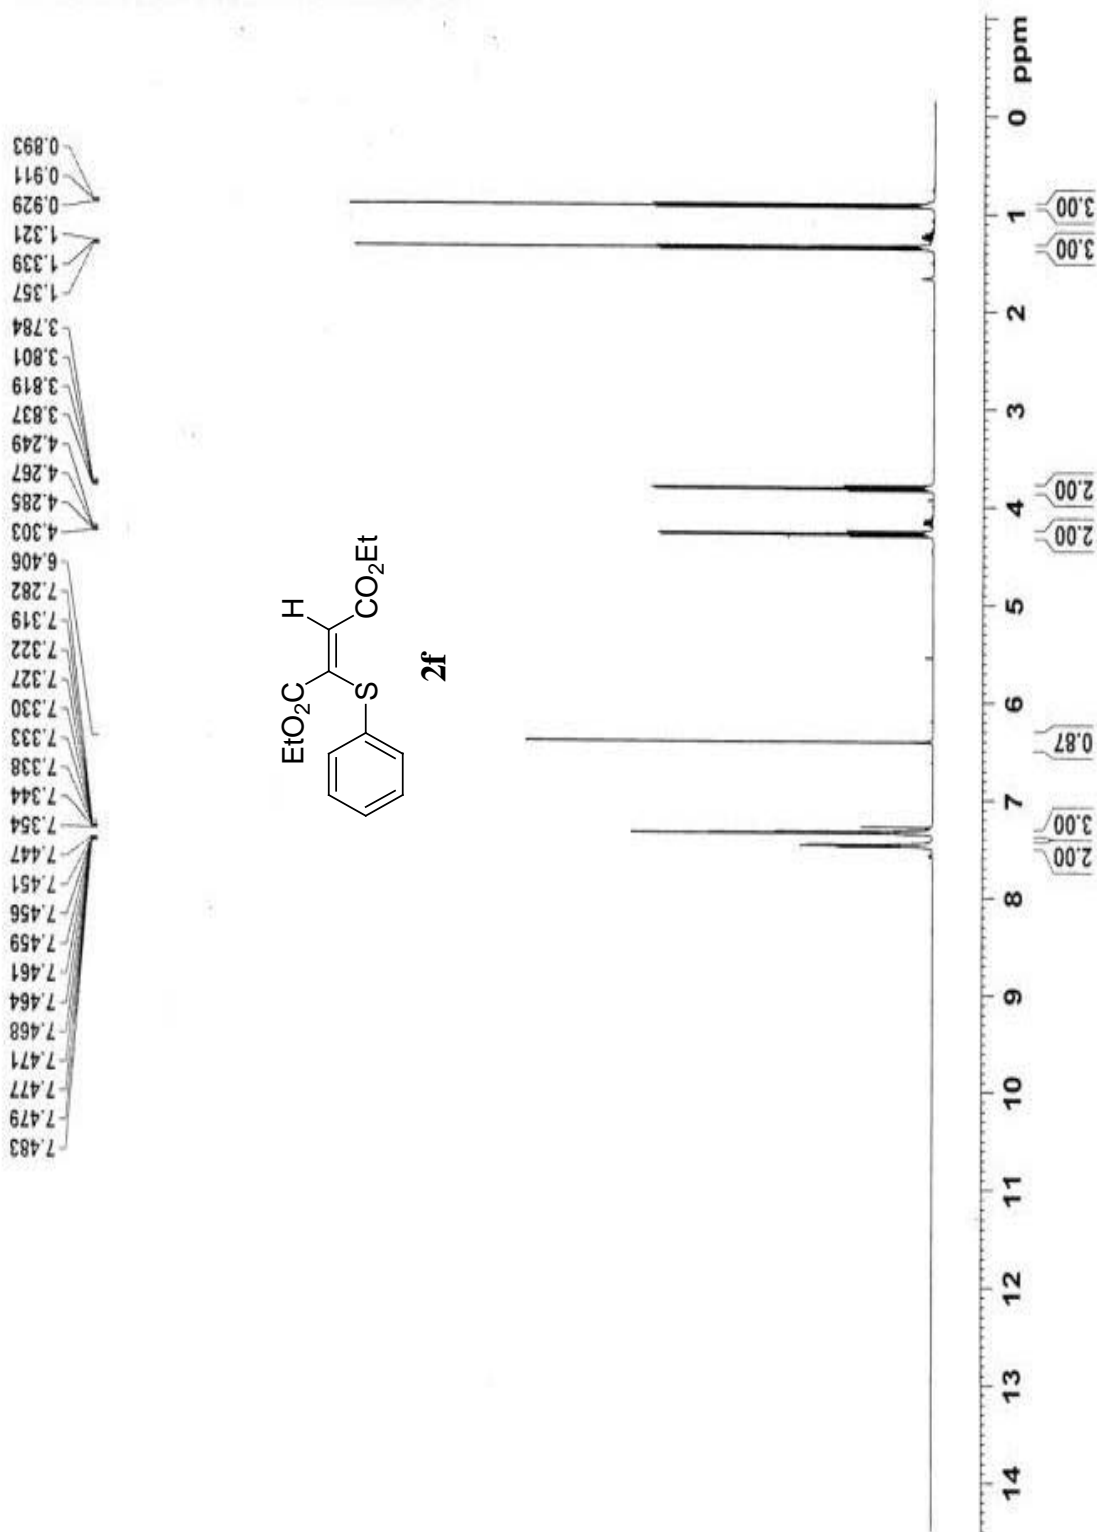

Supplementary Data

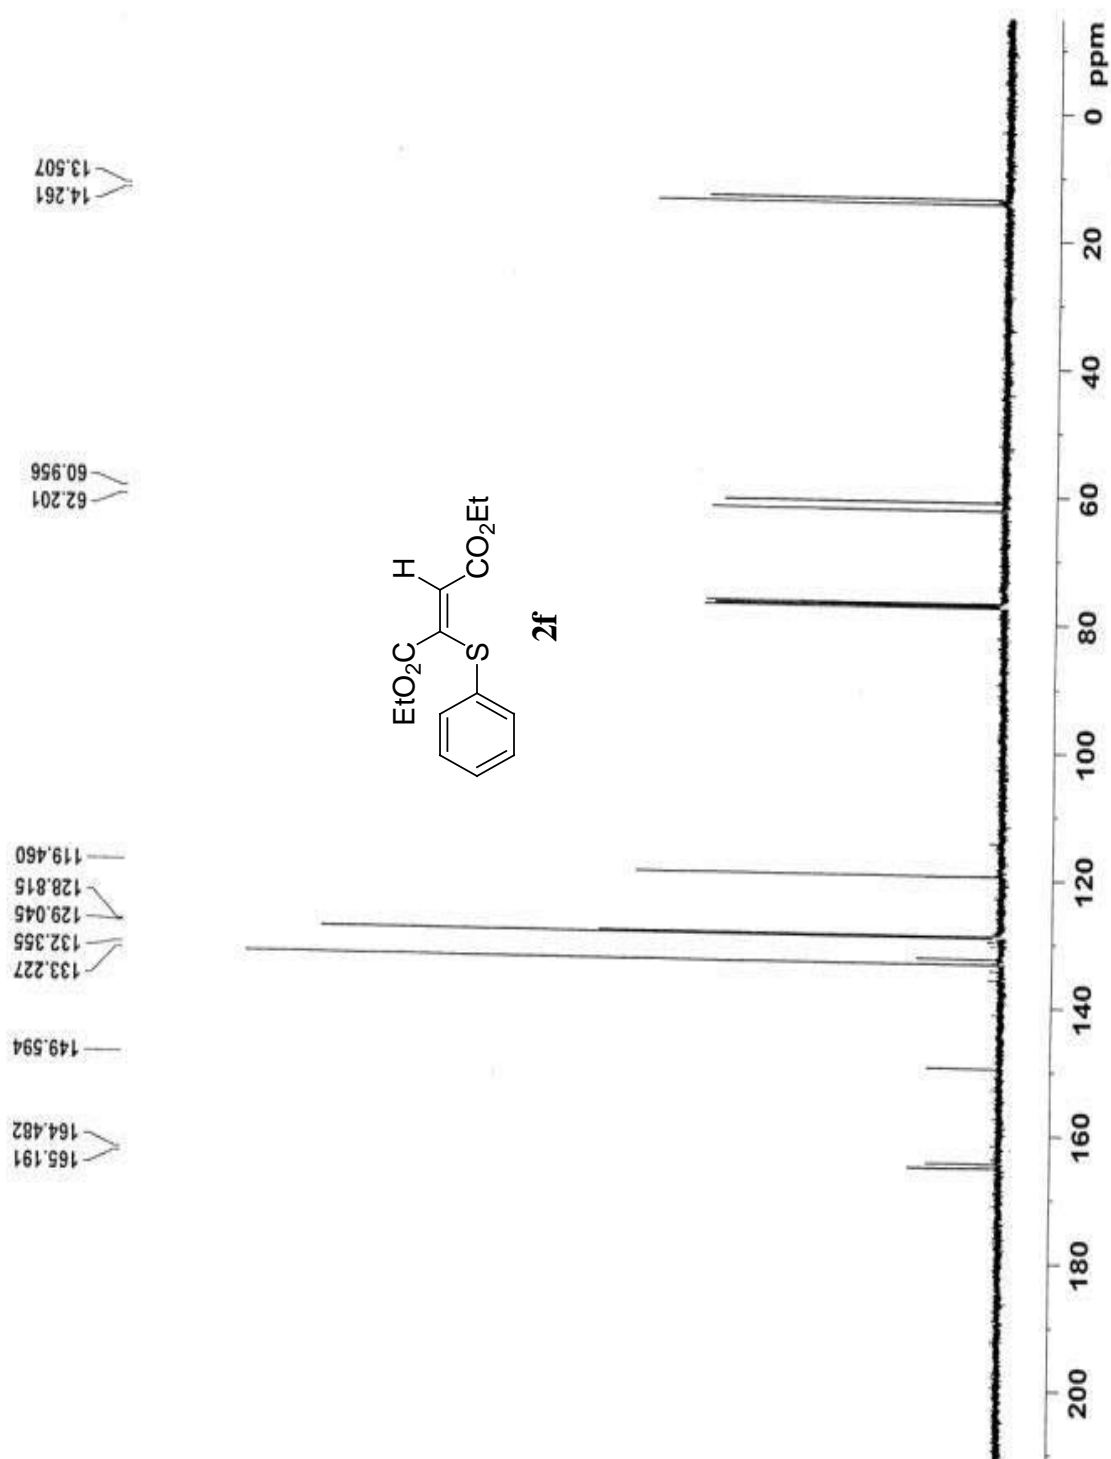



Supplementary Data

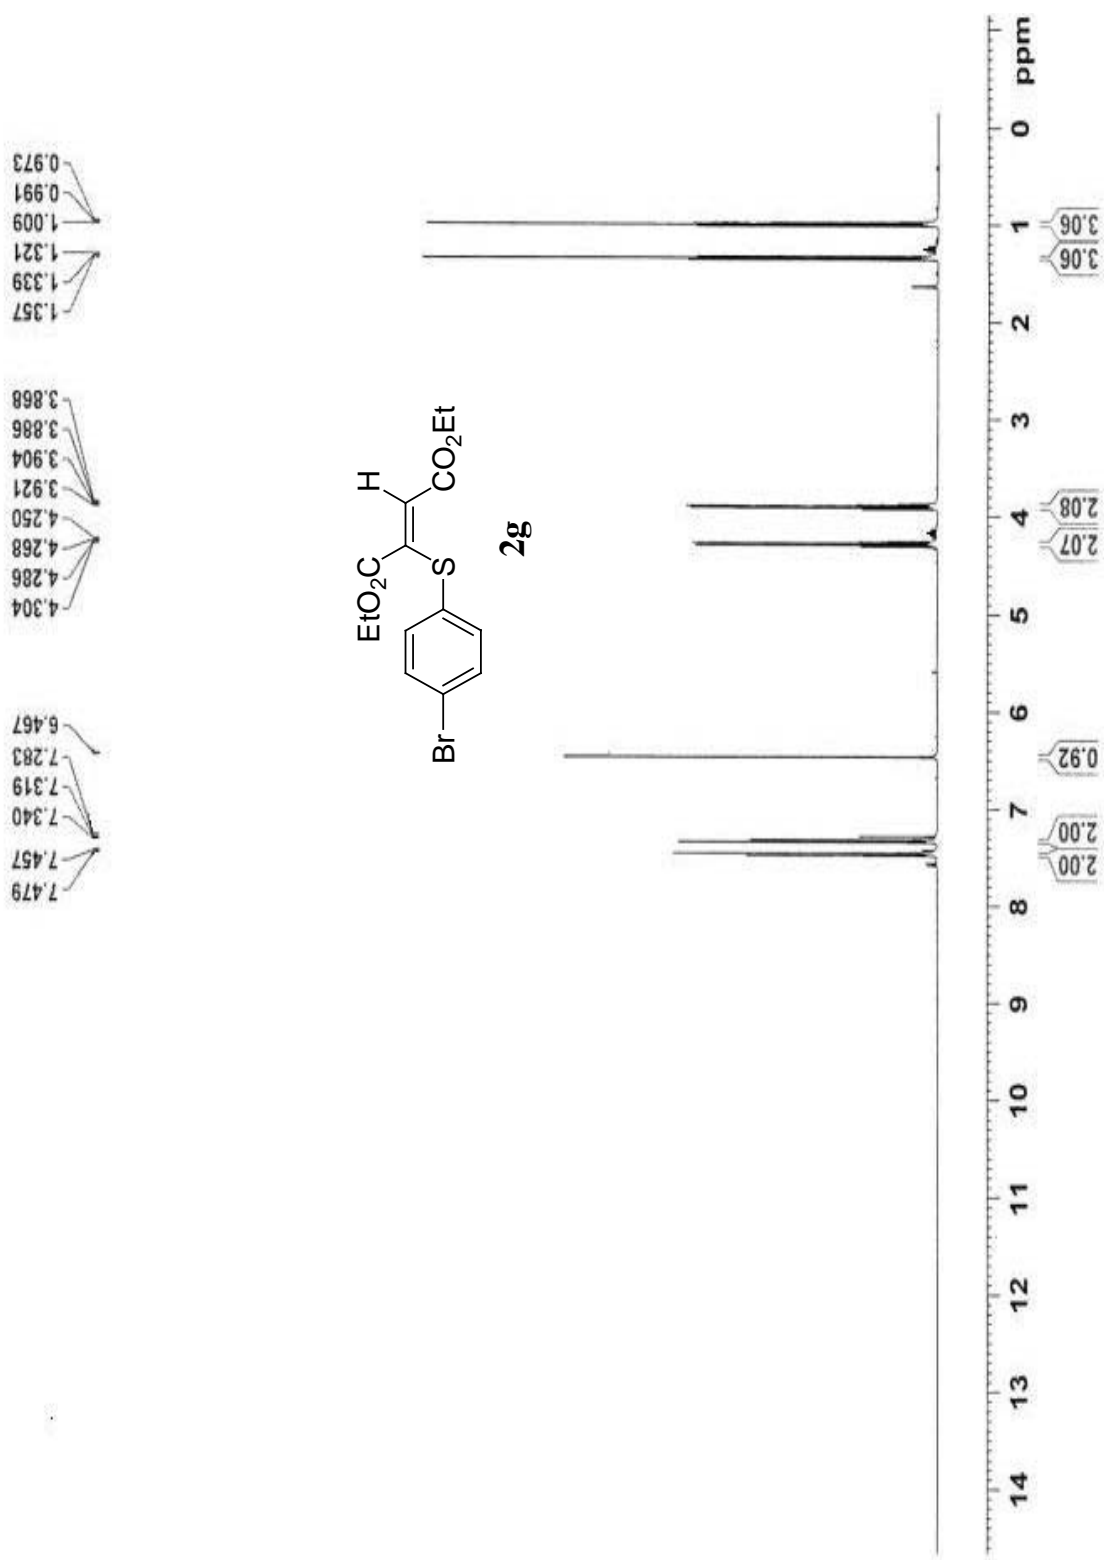

Supplementary Data

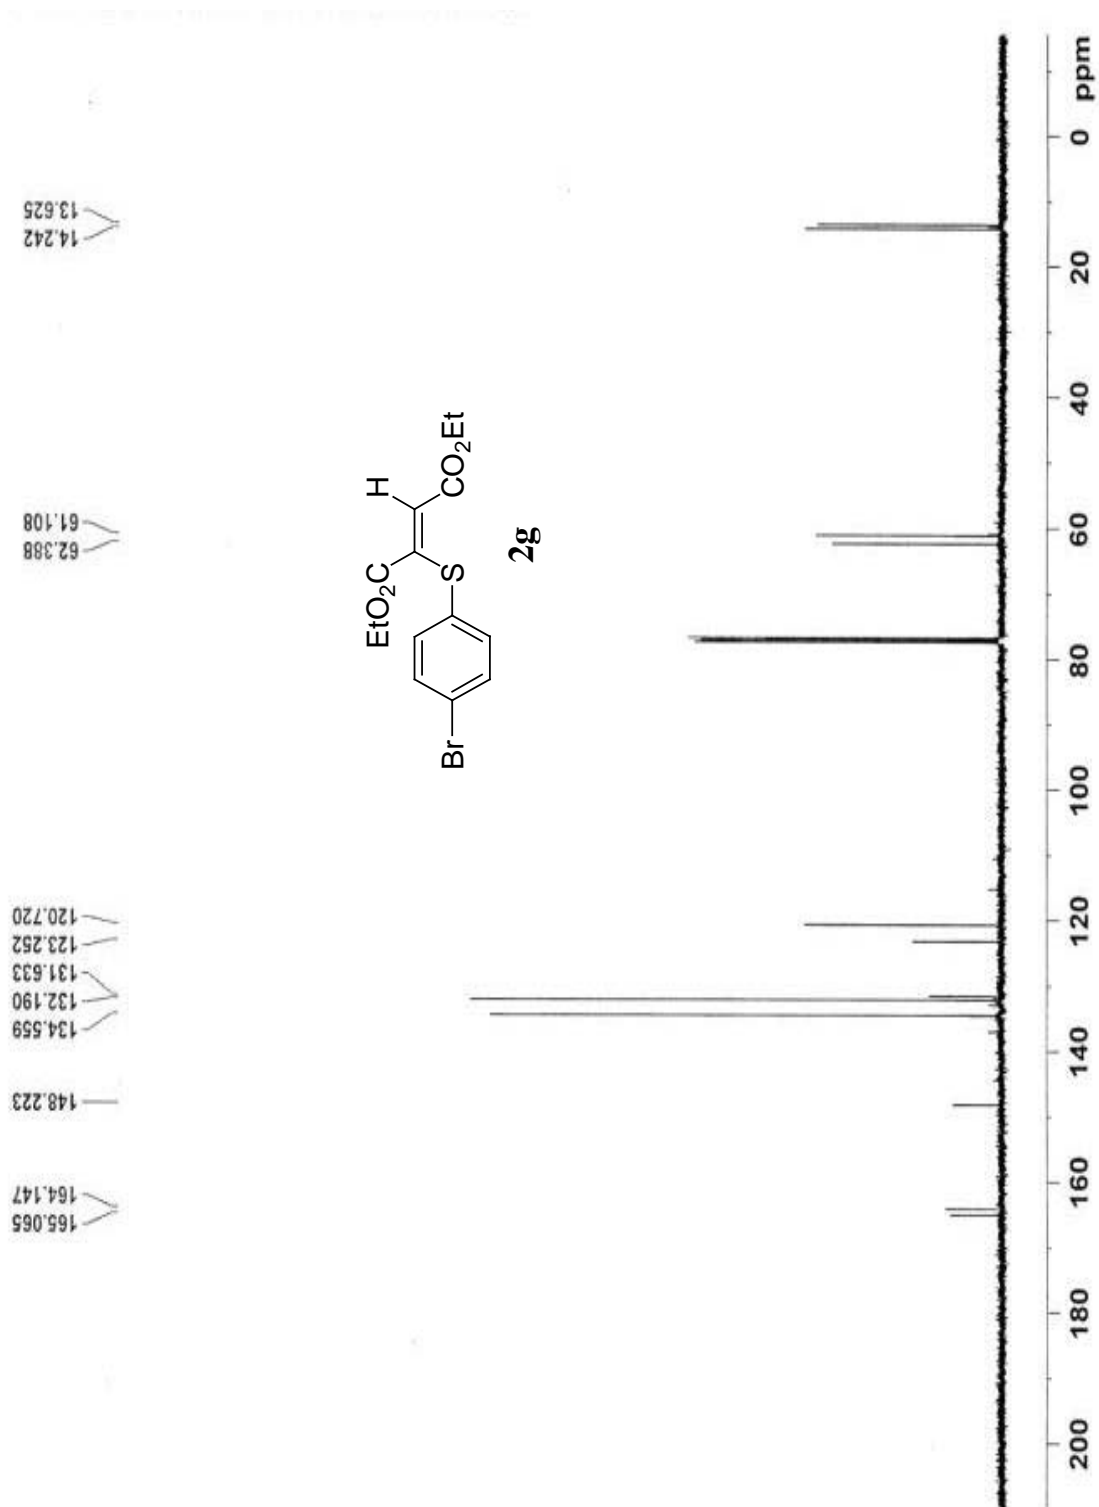

Supplementary Data

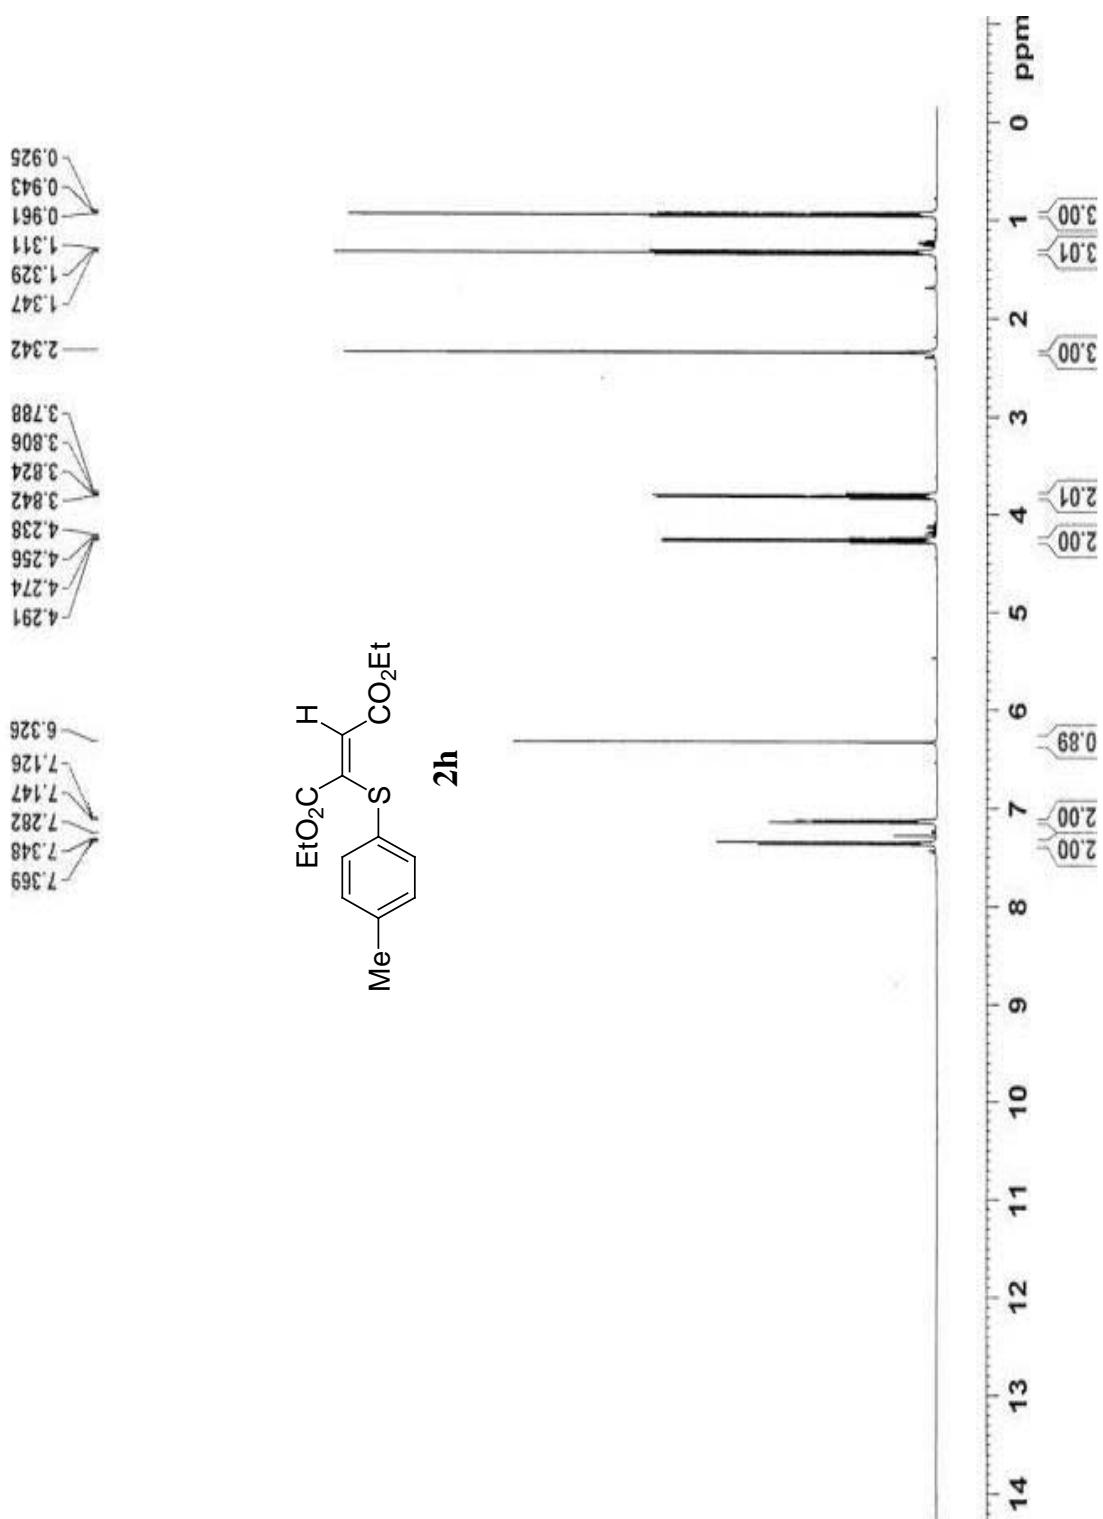

Supplementary Data

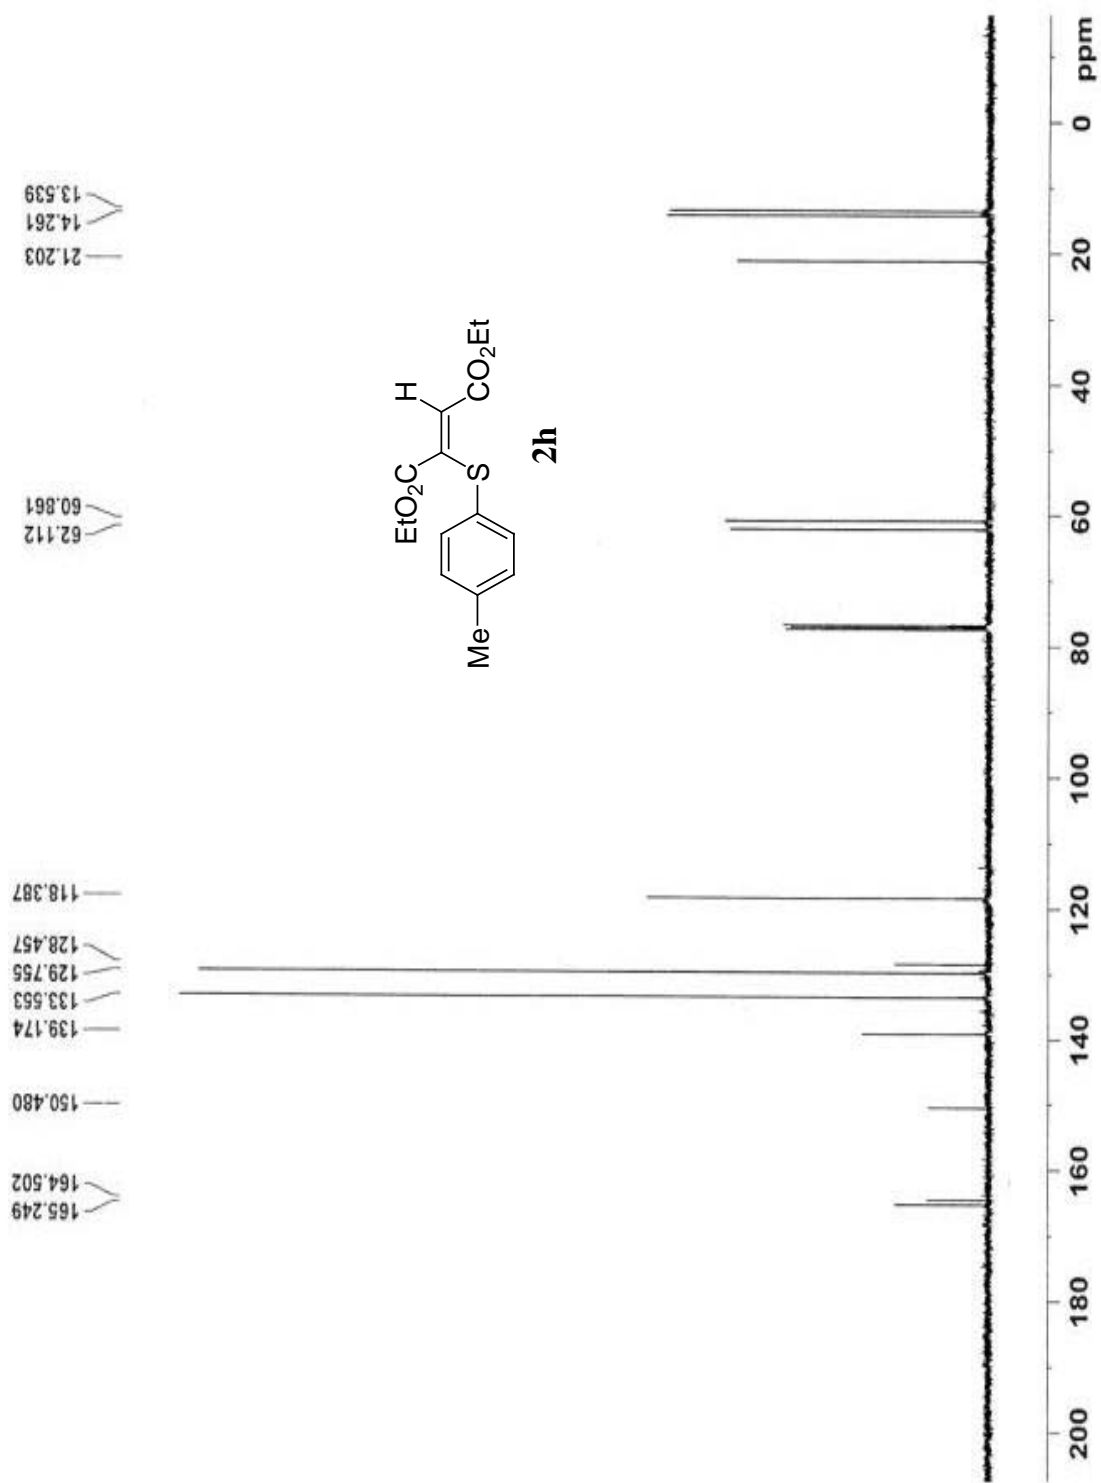

Supplementary Data

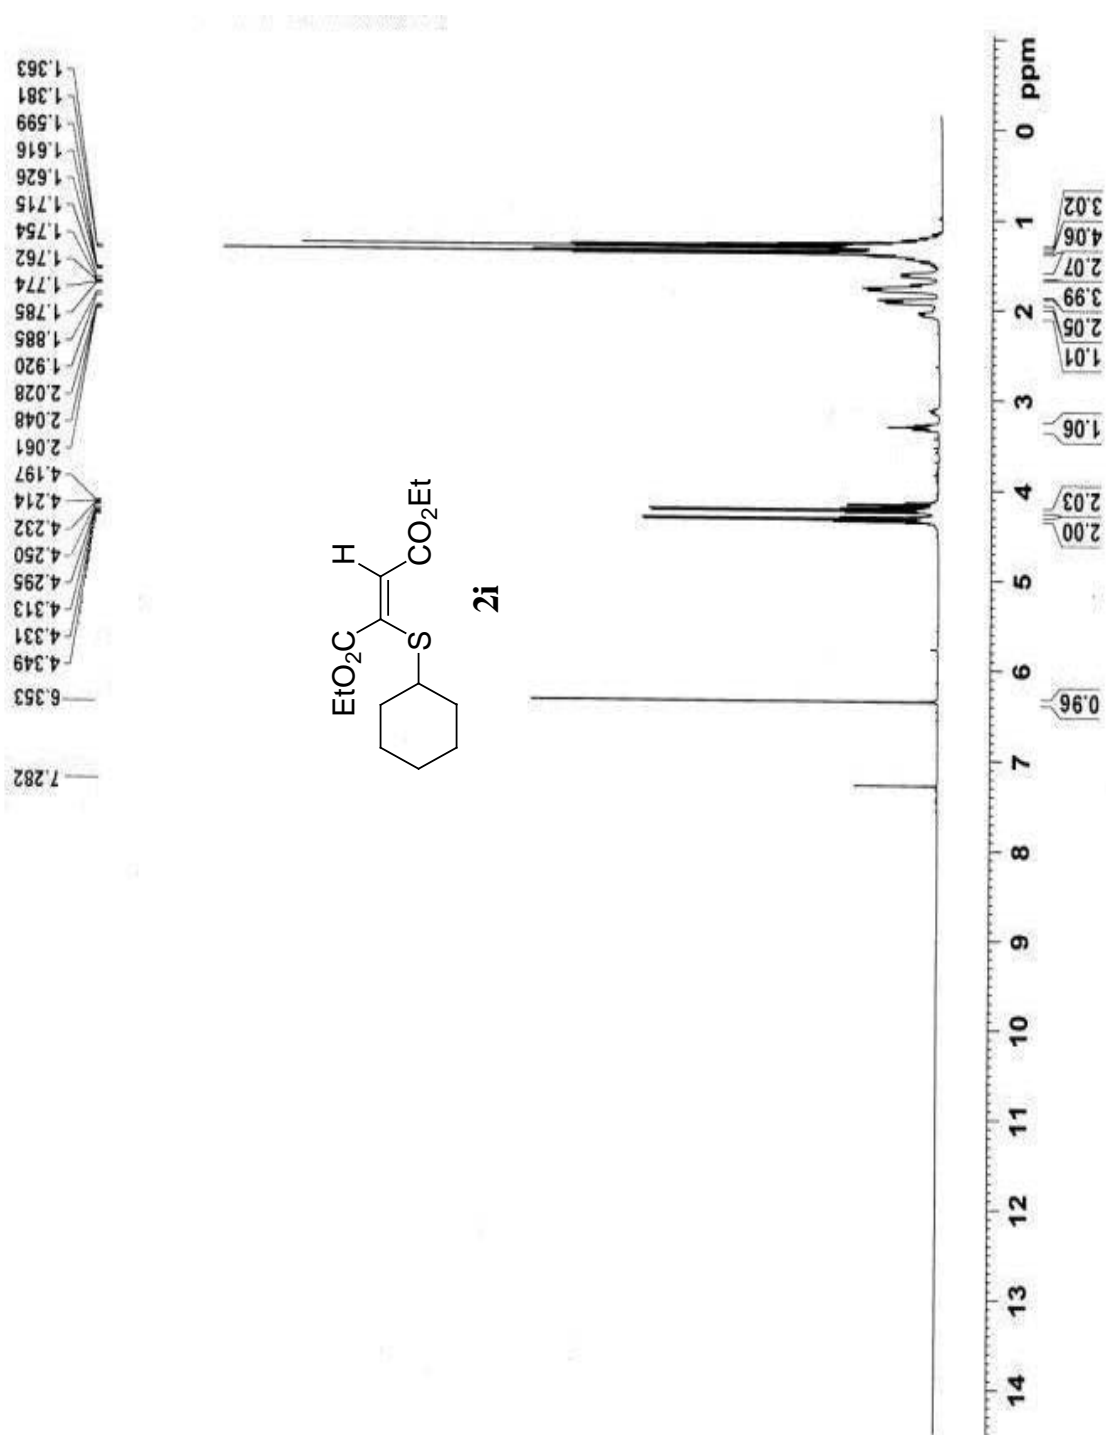

Supplementary Data

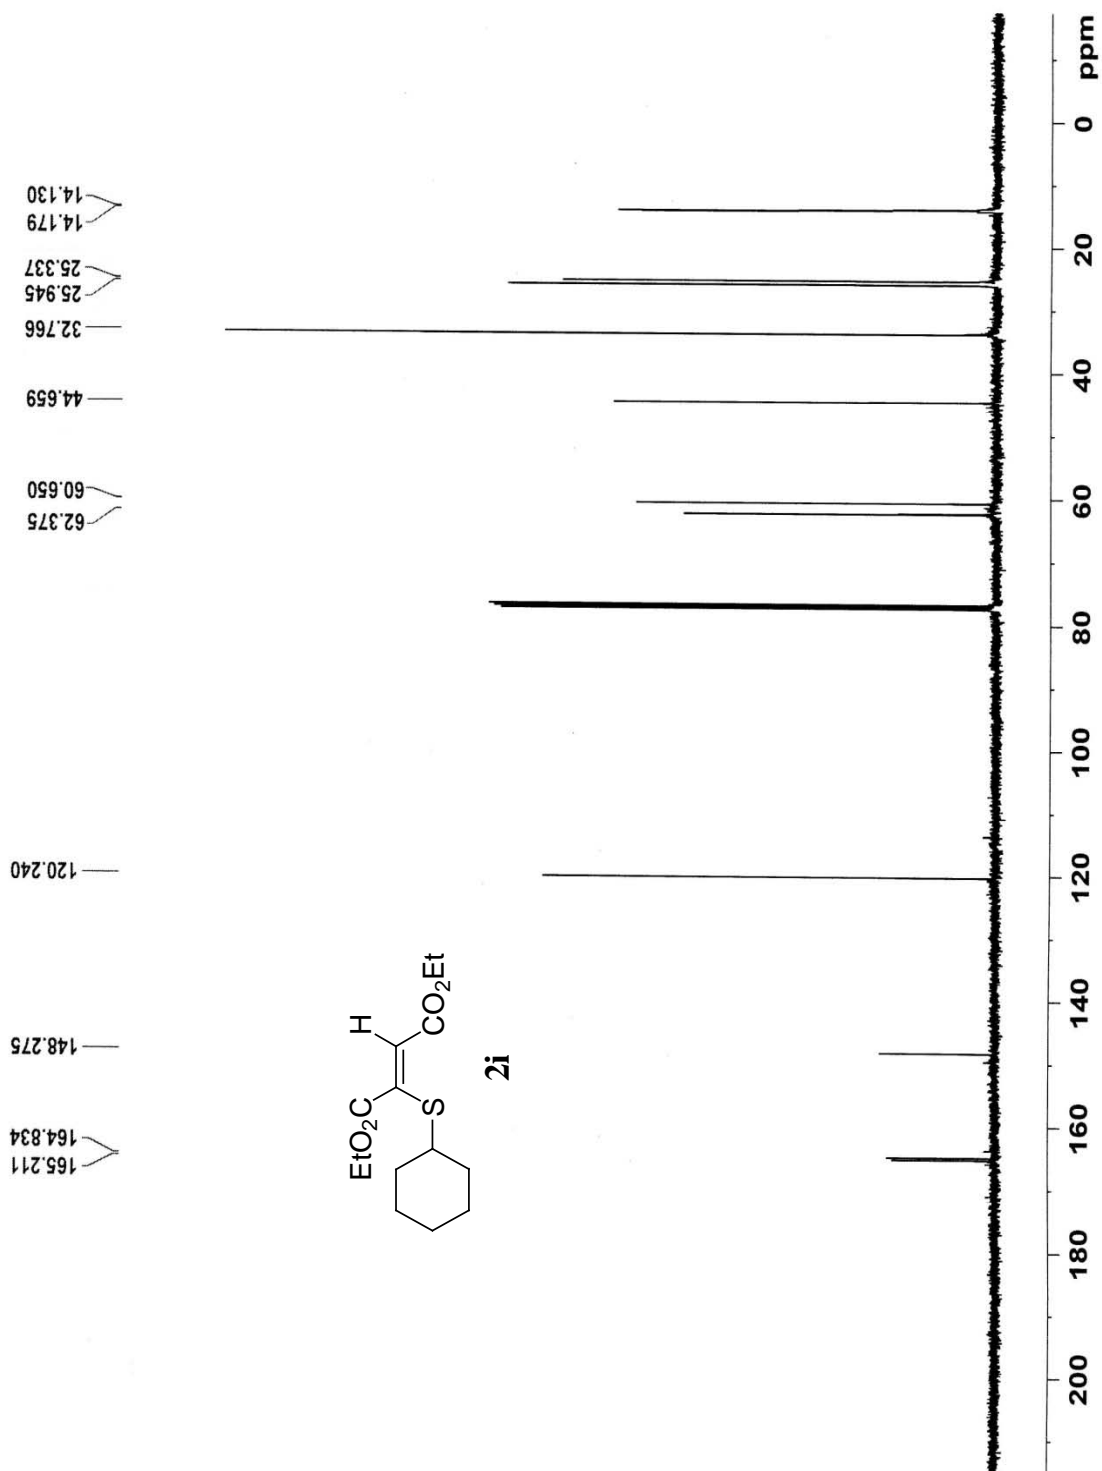

Supplementary Data

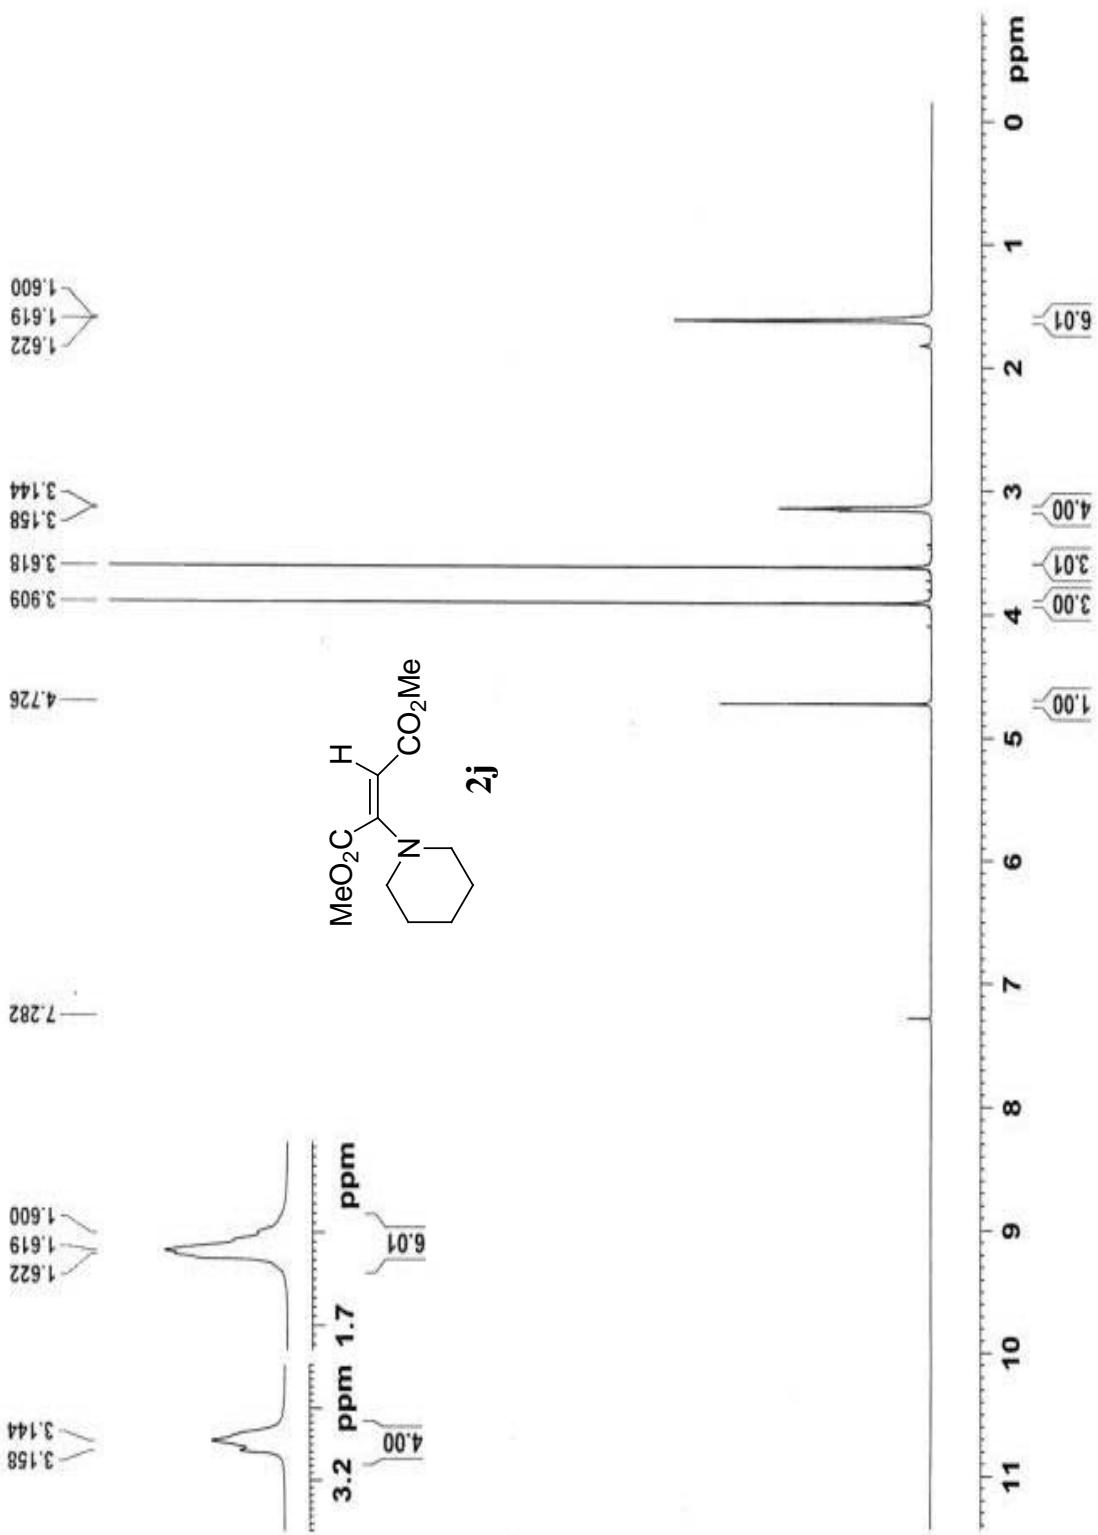

Supplementary Data

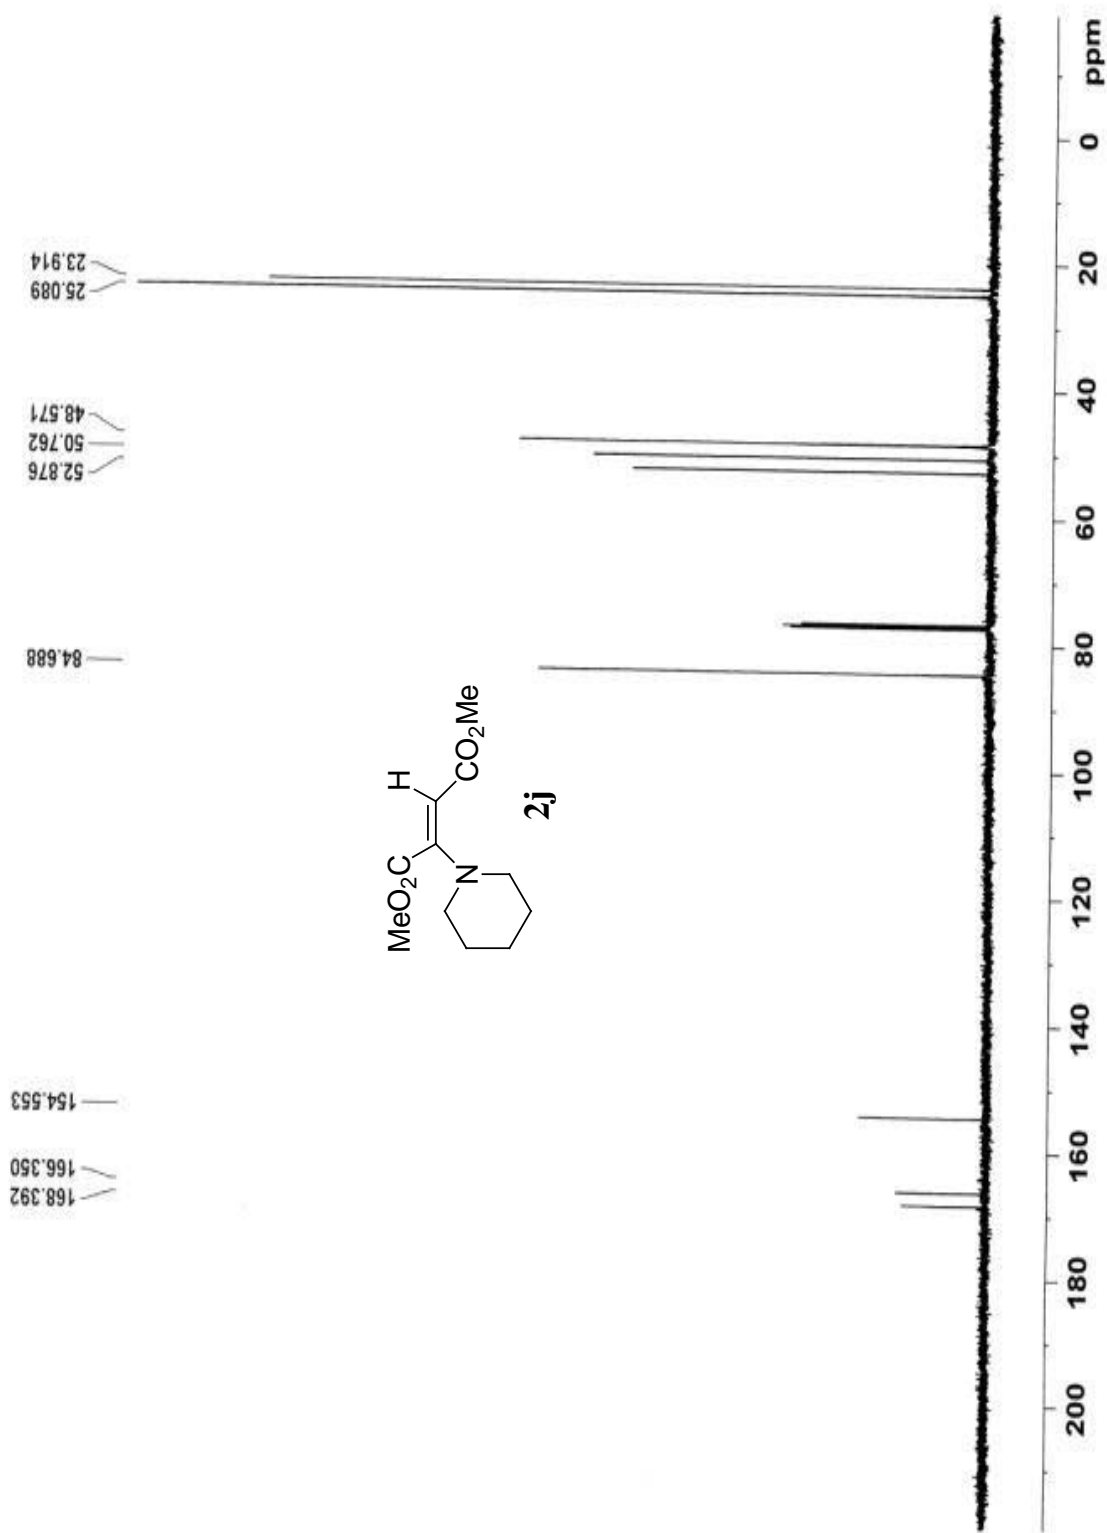



Supplementary Data

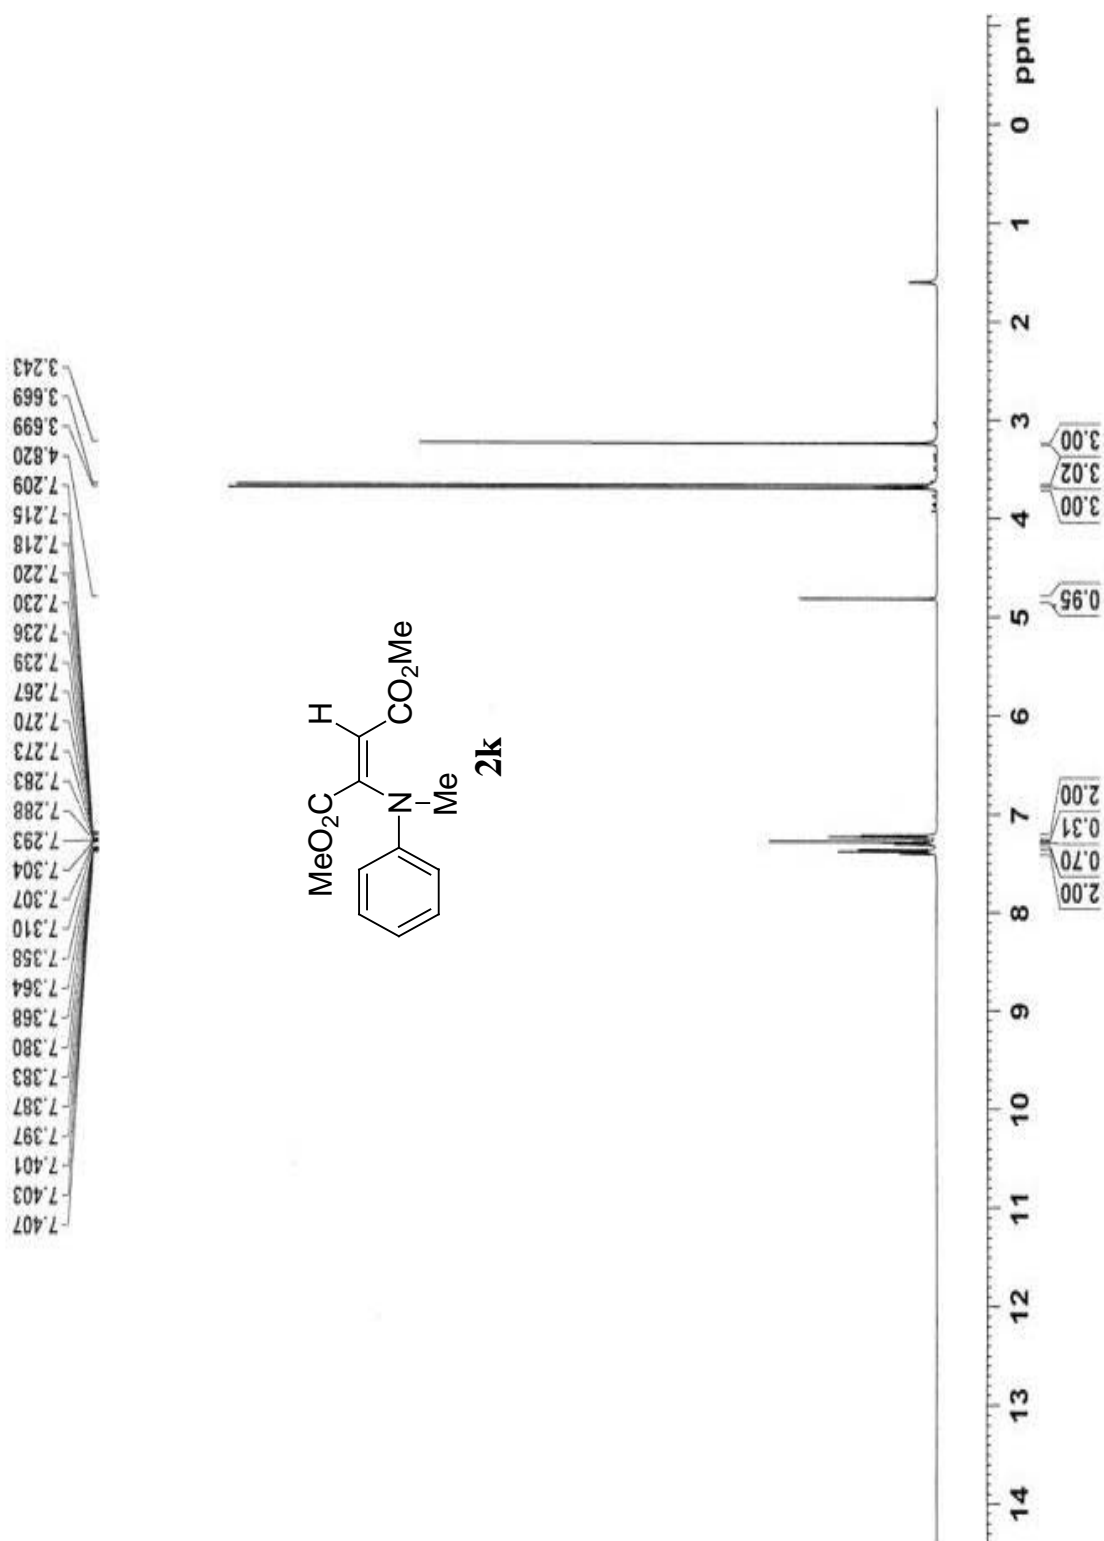

Supplementary Data

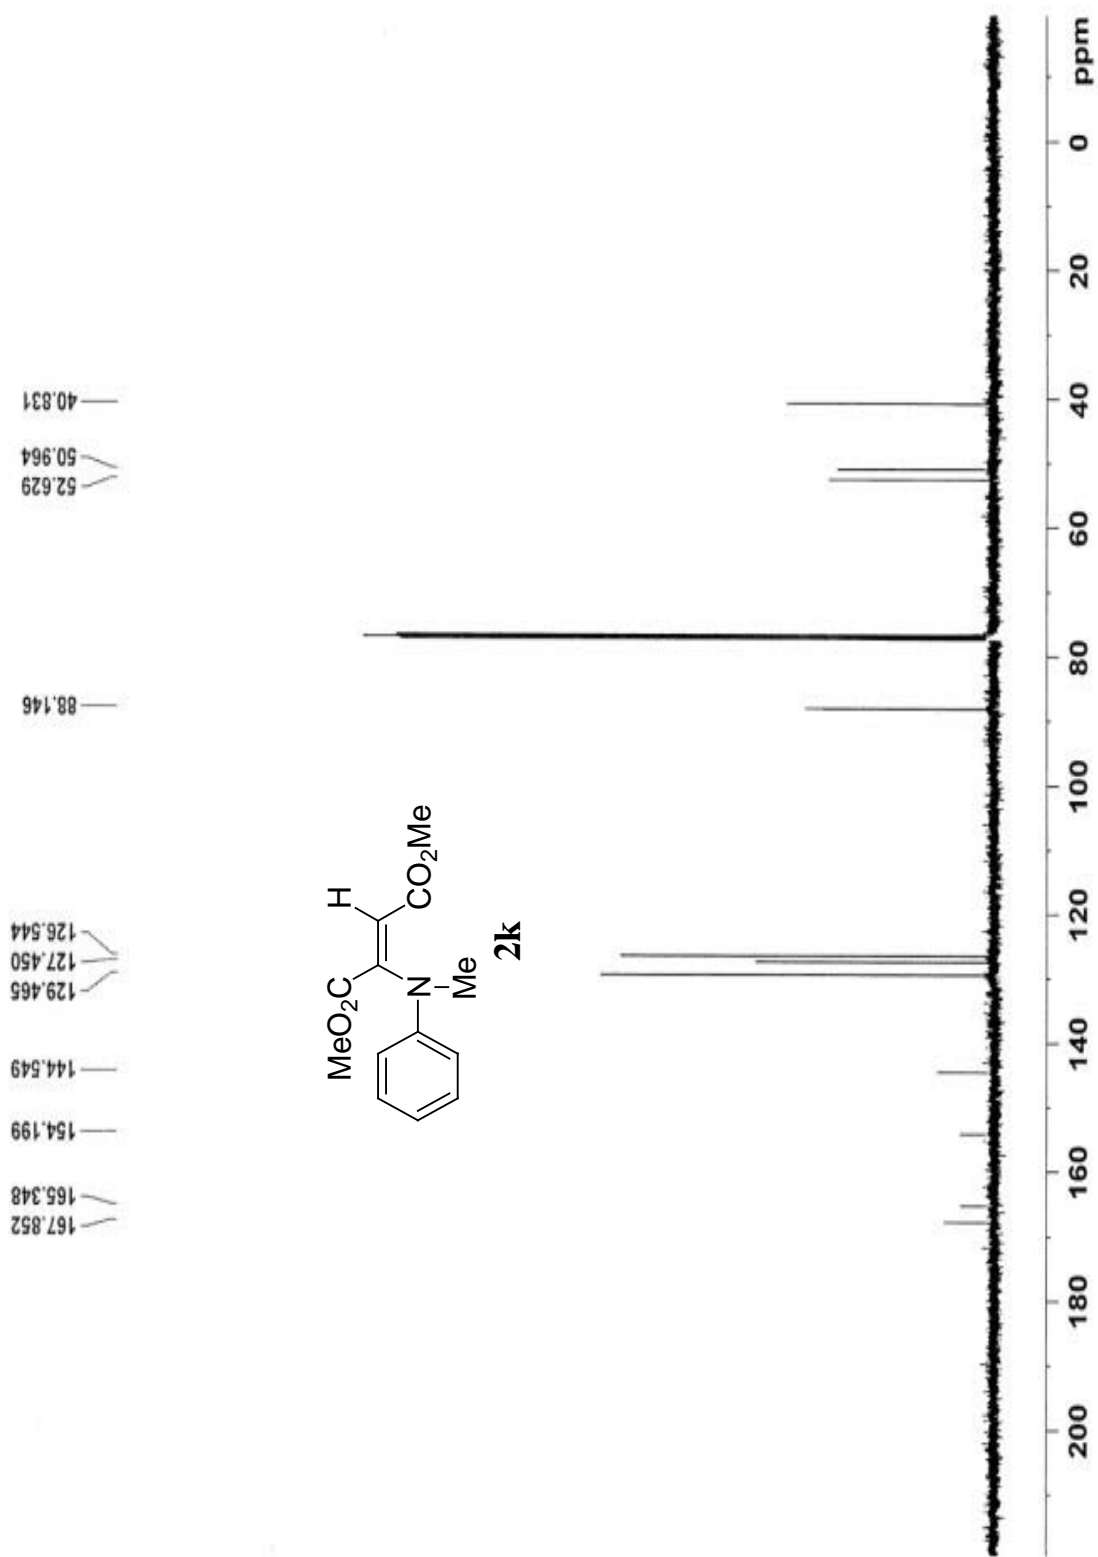

Supplementary Data

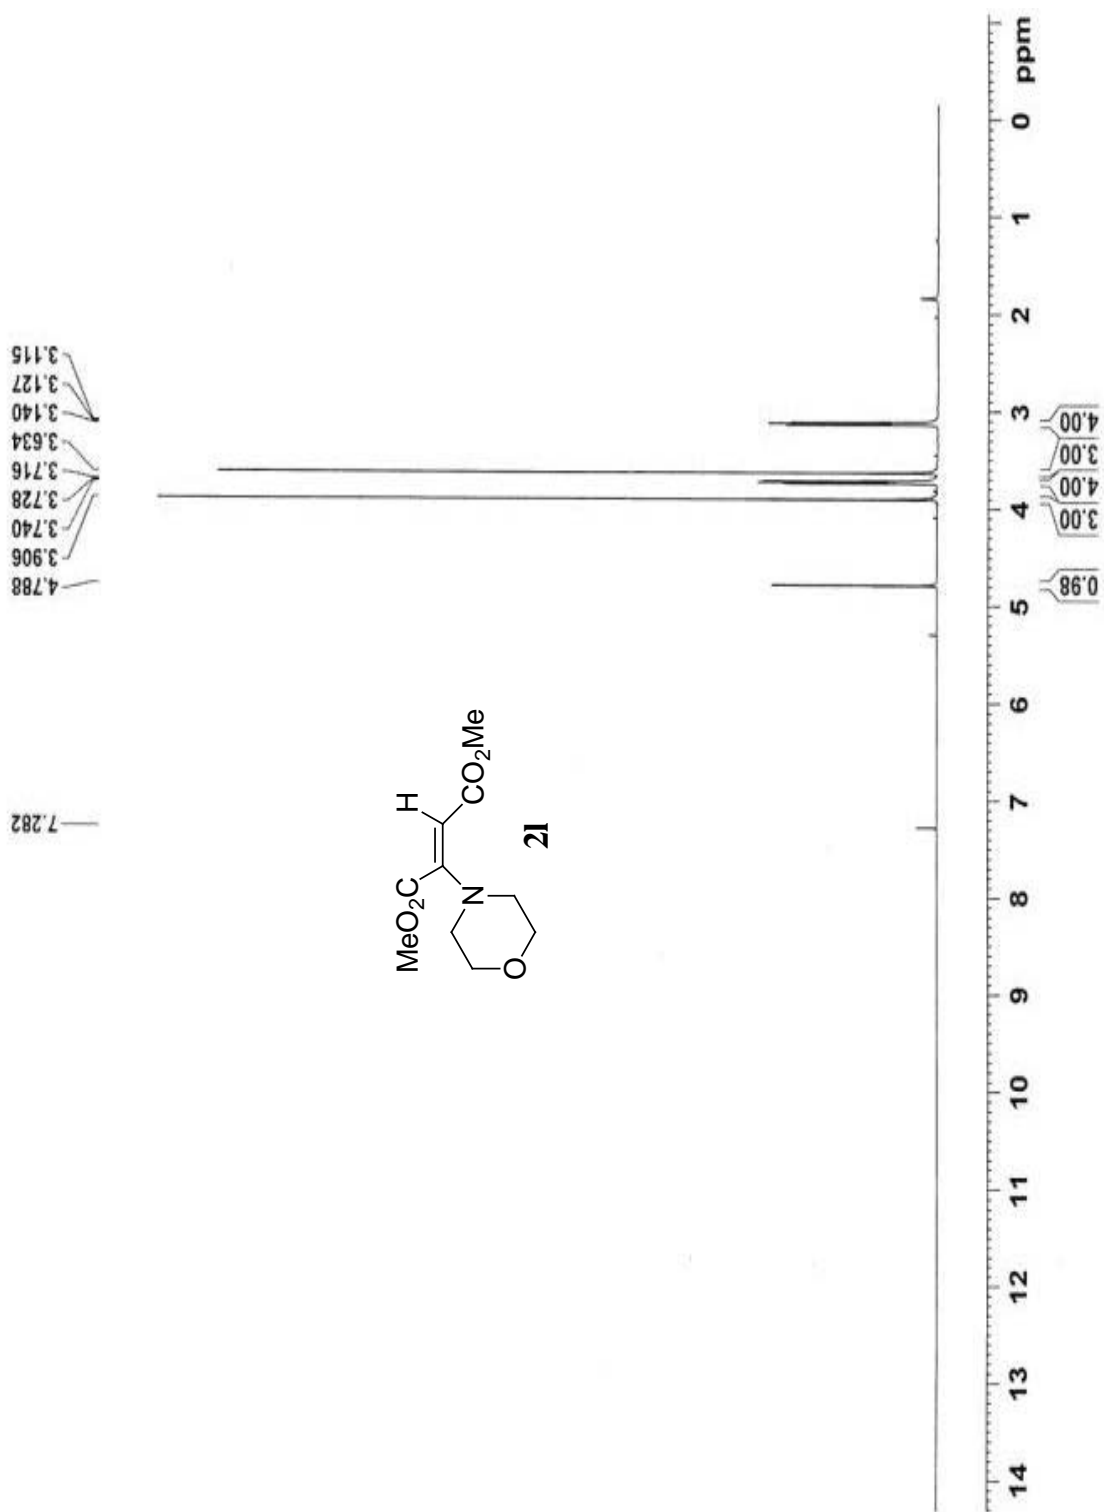

Supplementary Data

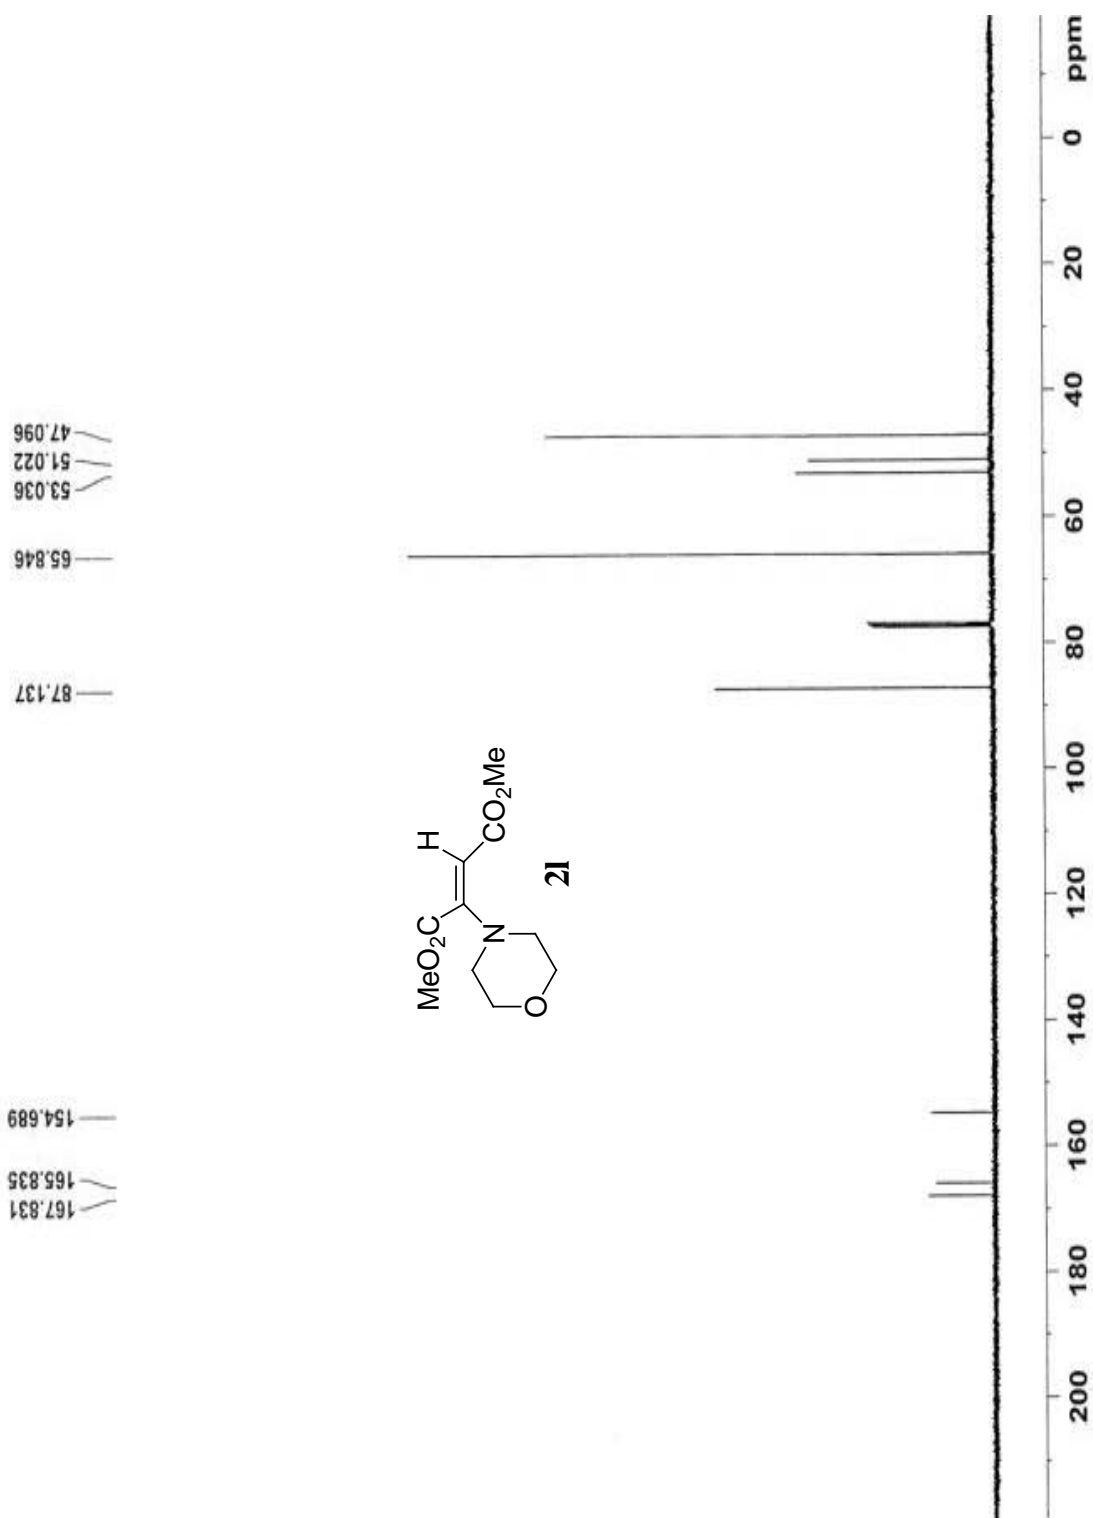

Supplementary Data

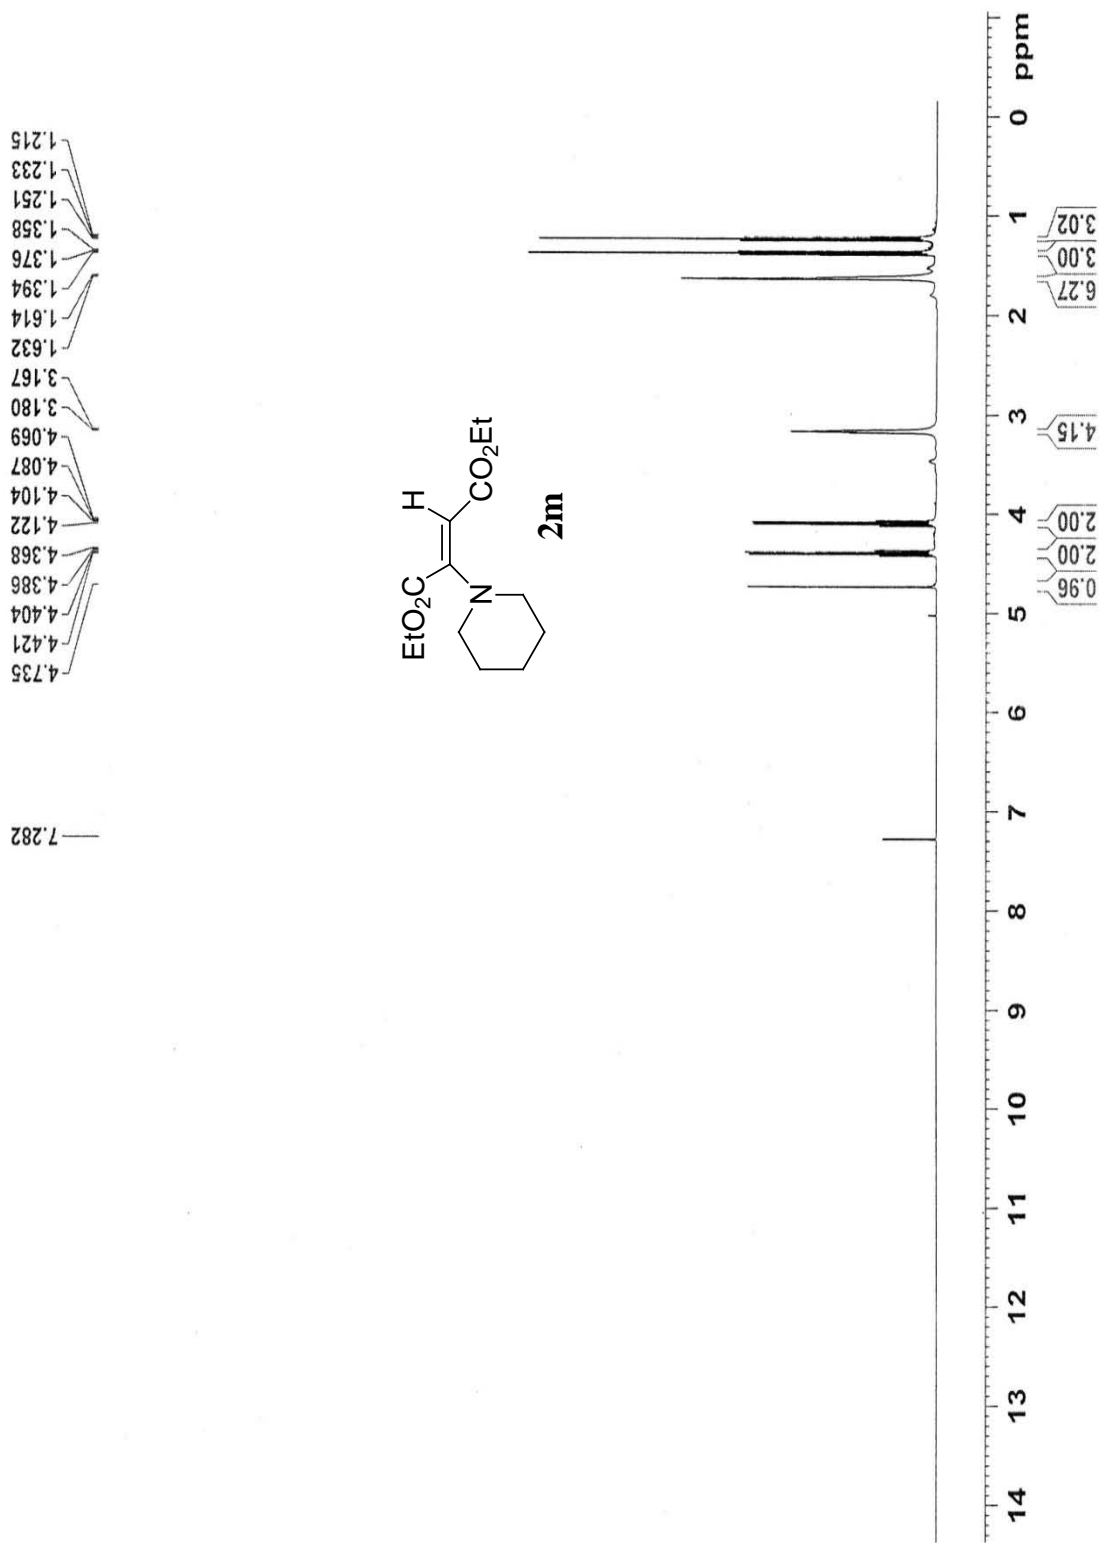

Supplementary Data

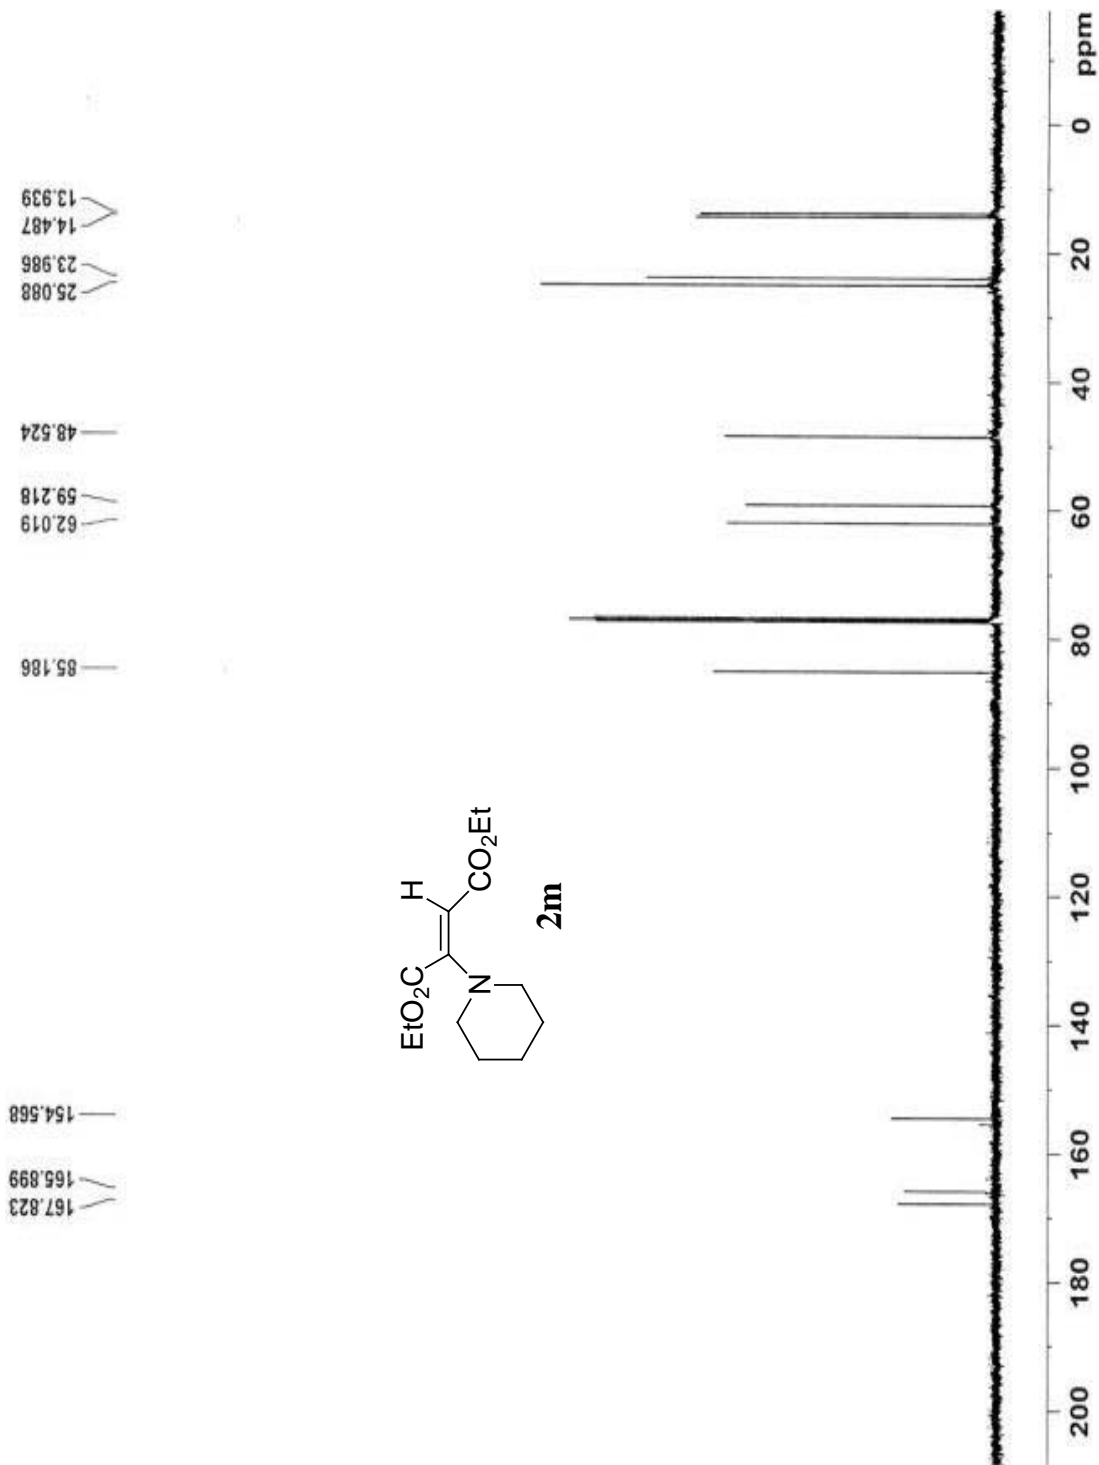

Supplementary Data

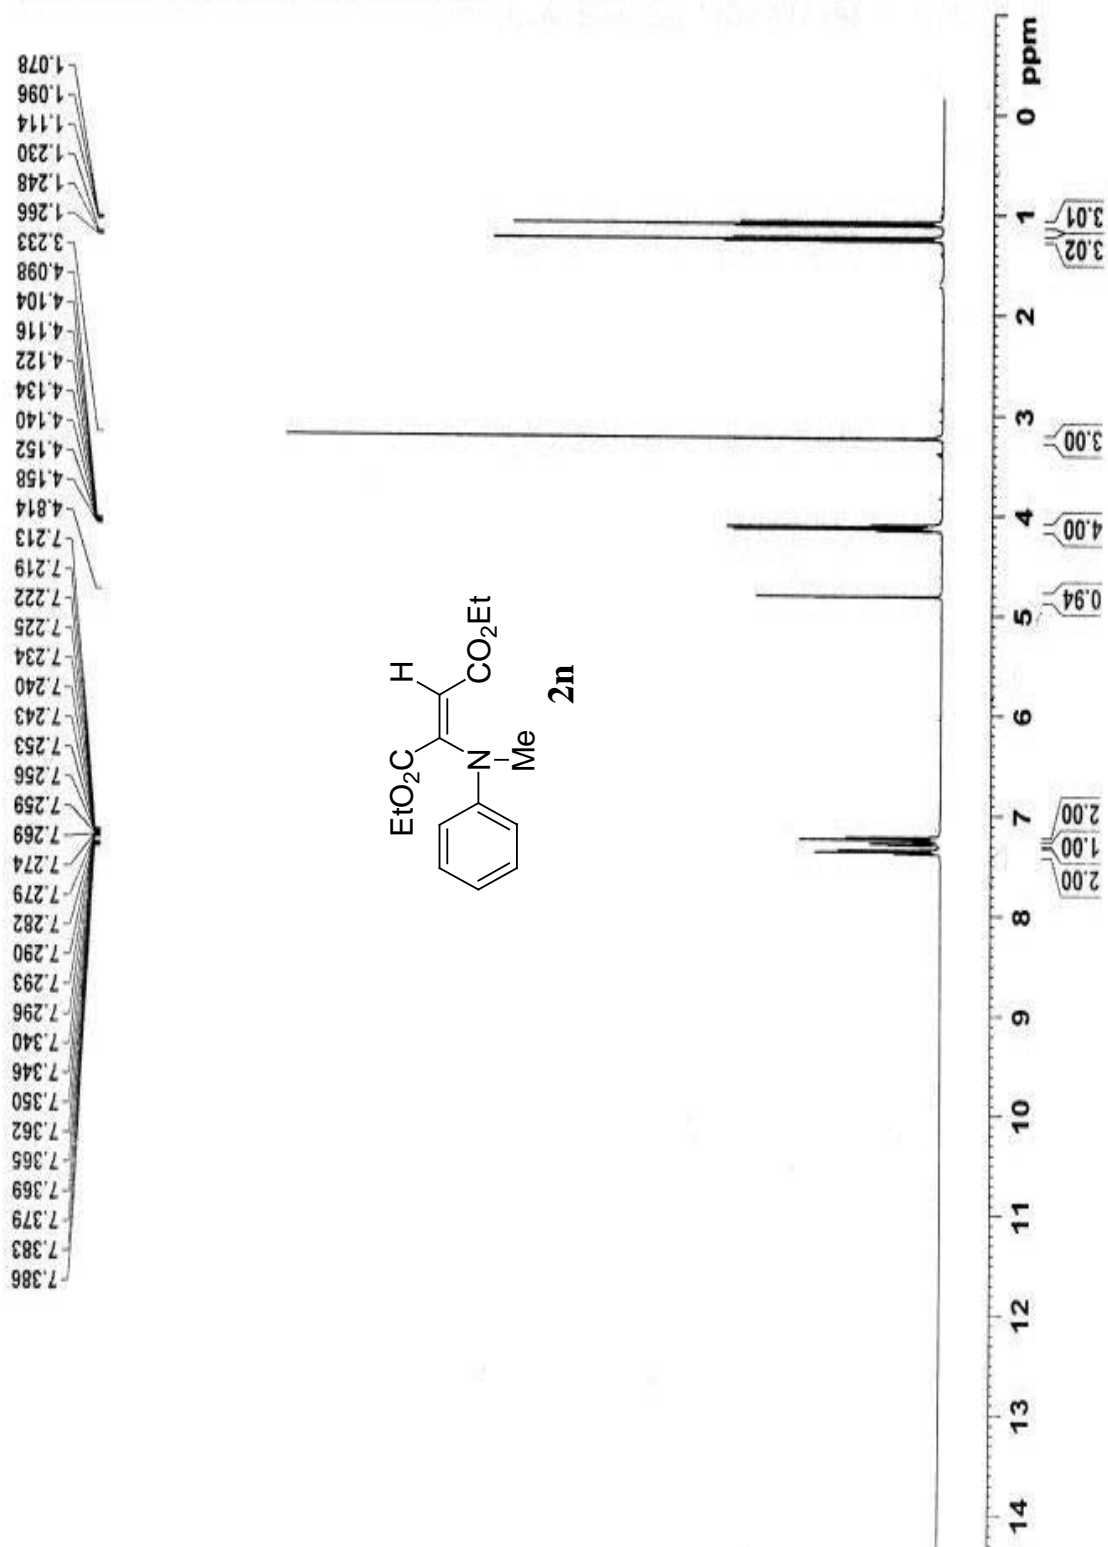

Supplementary Data

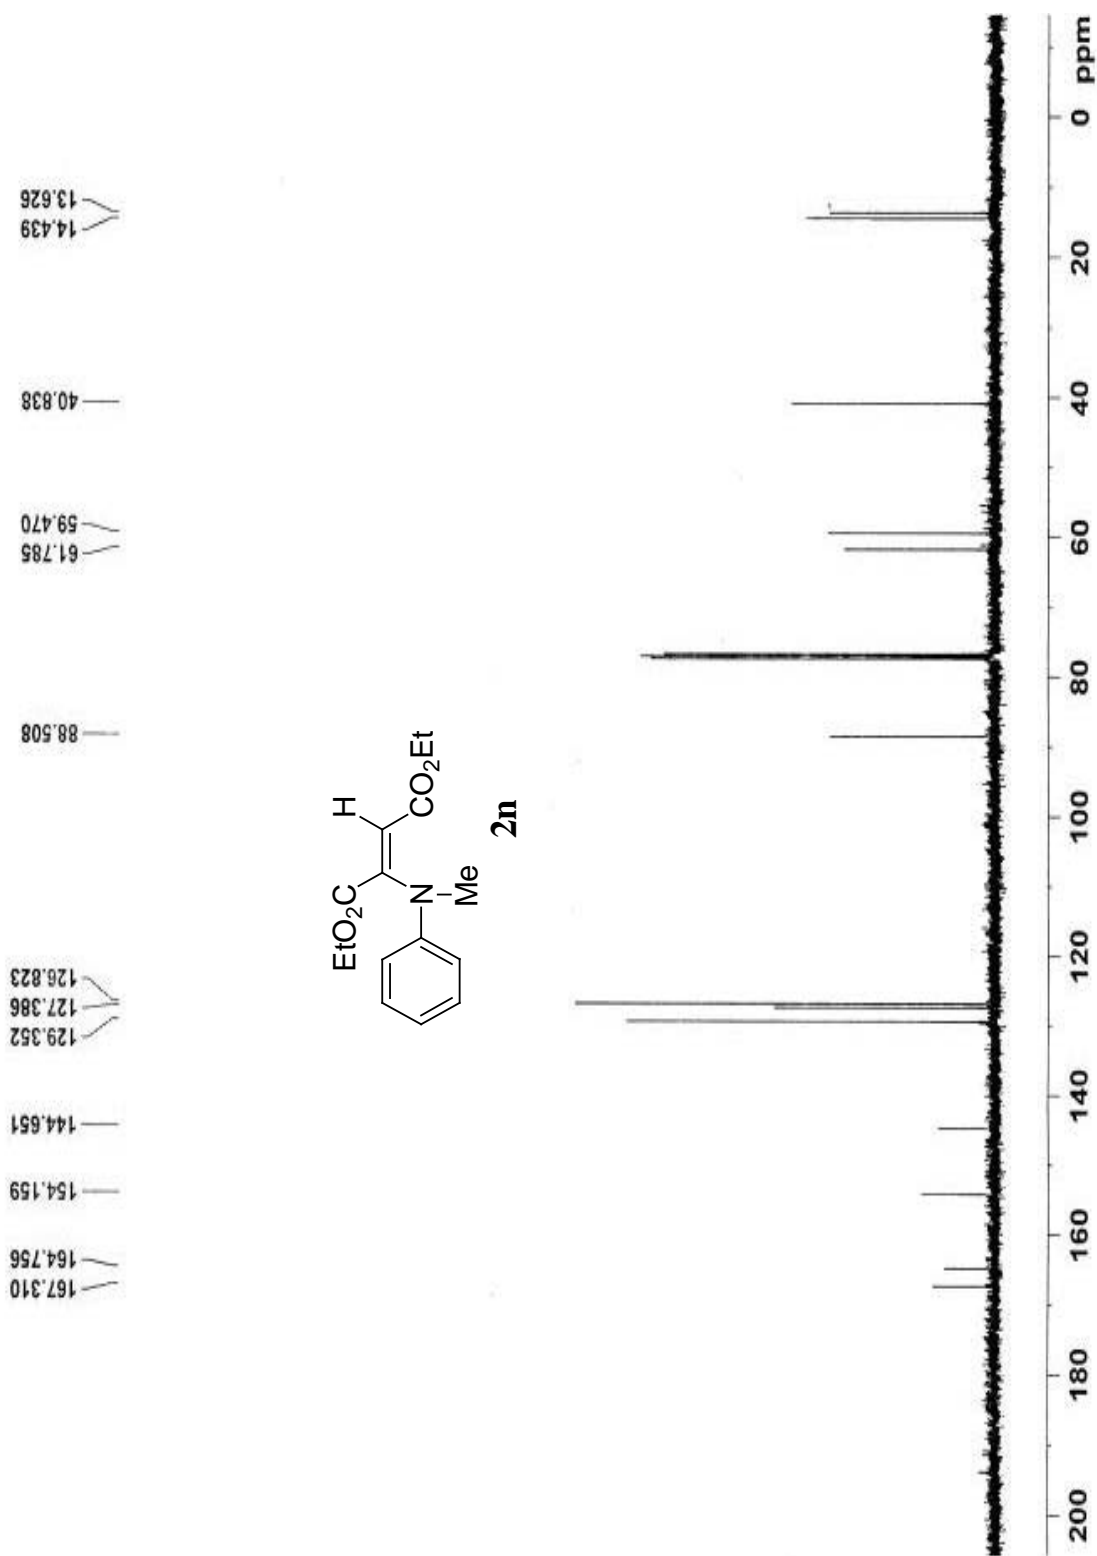



Supplementary Data

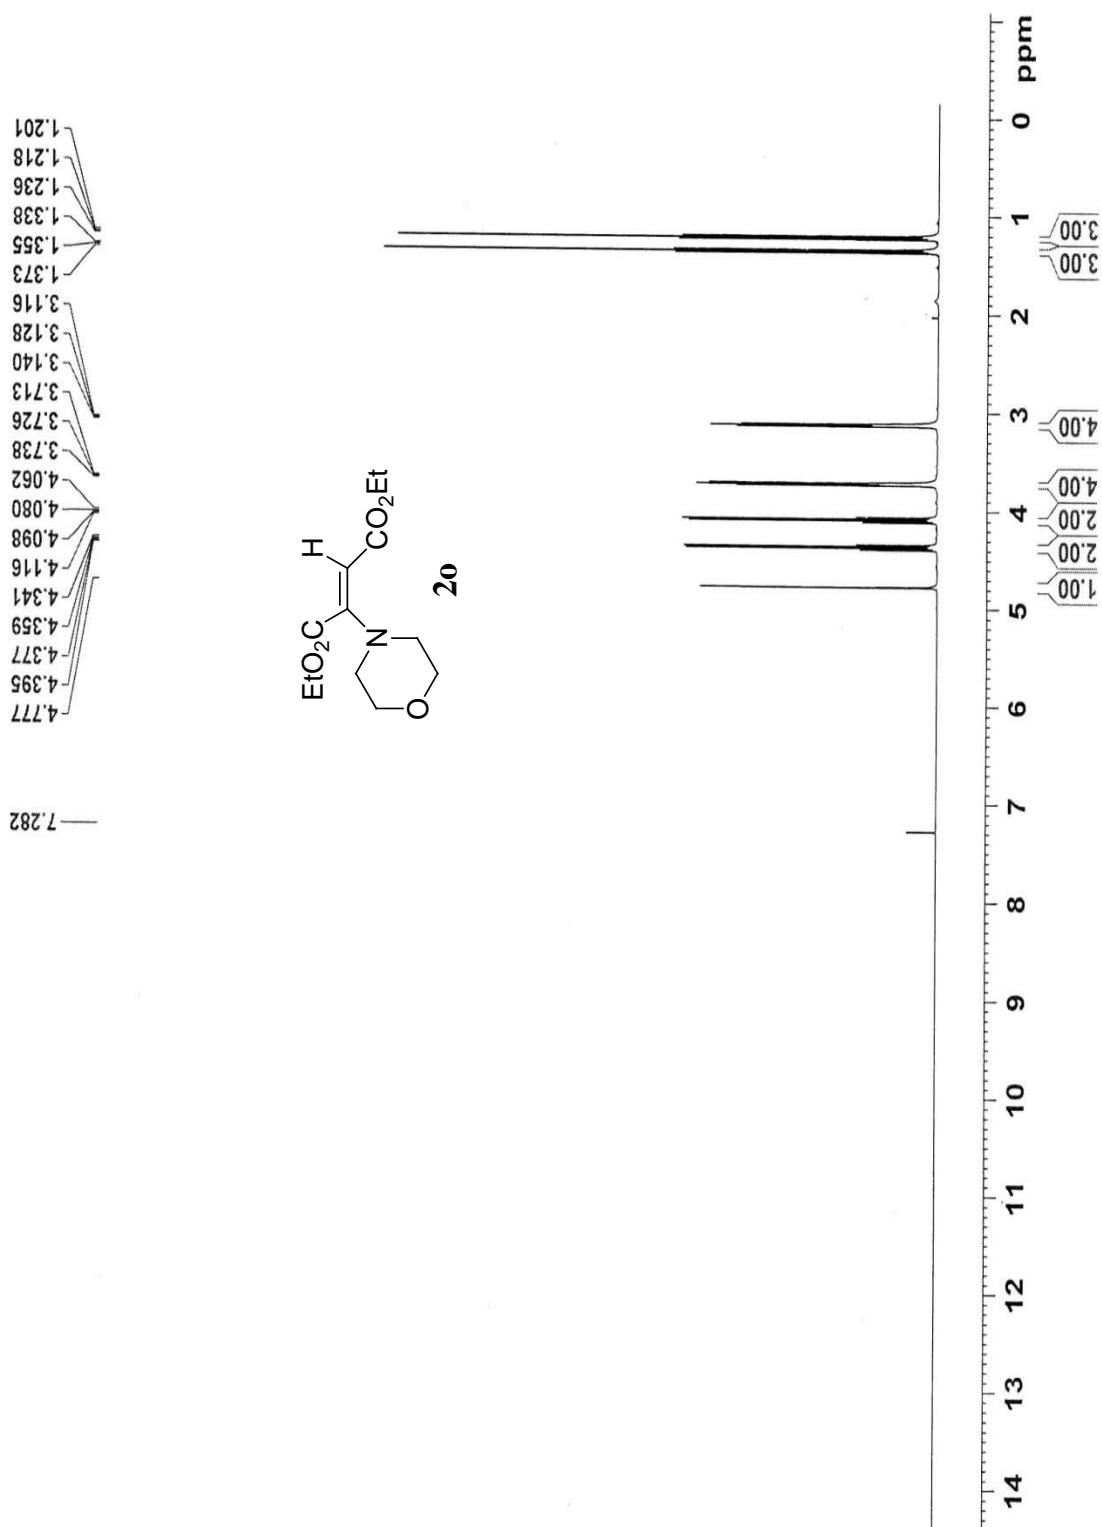

Supplementary Data

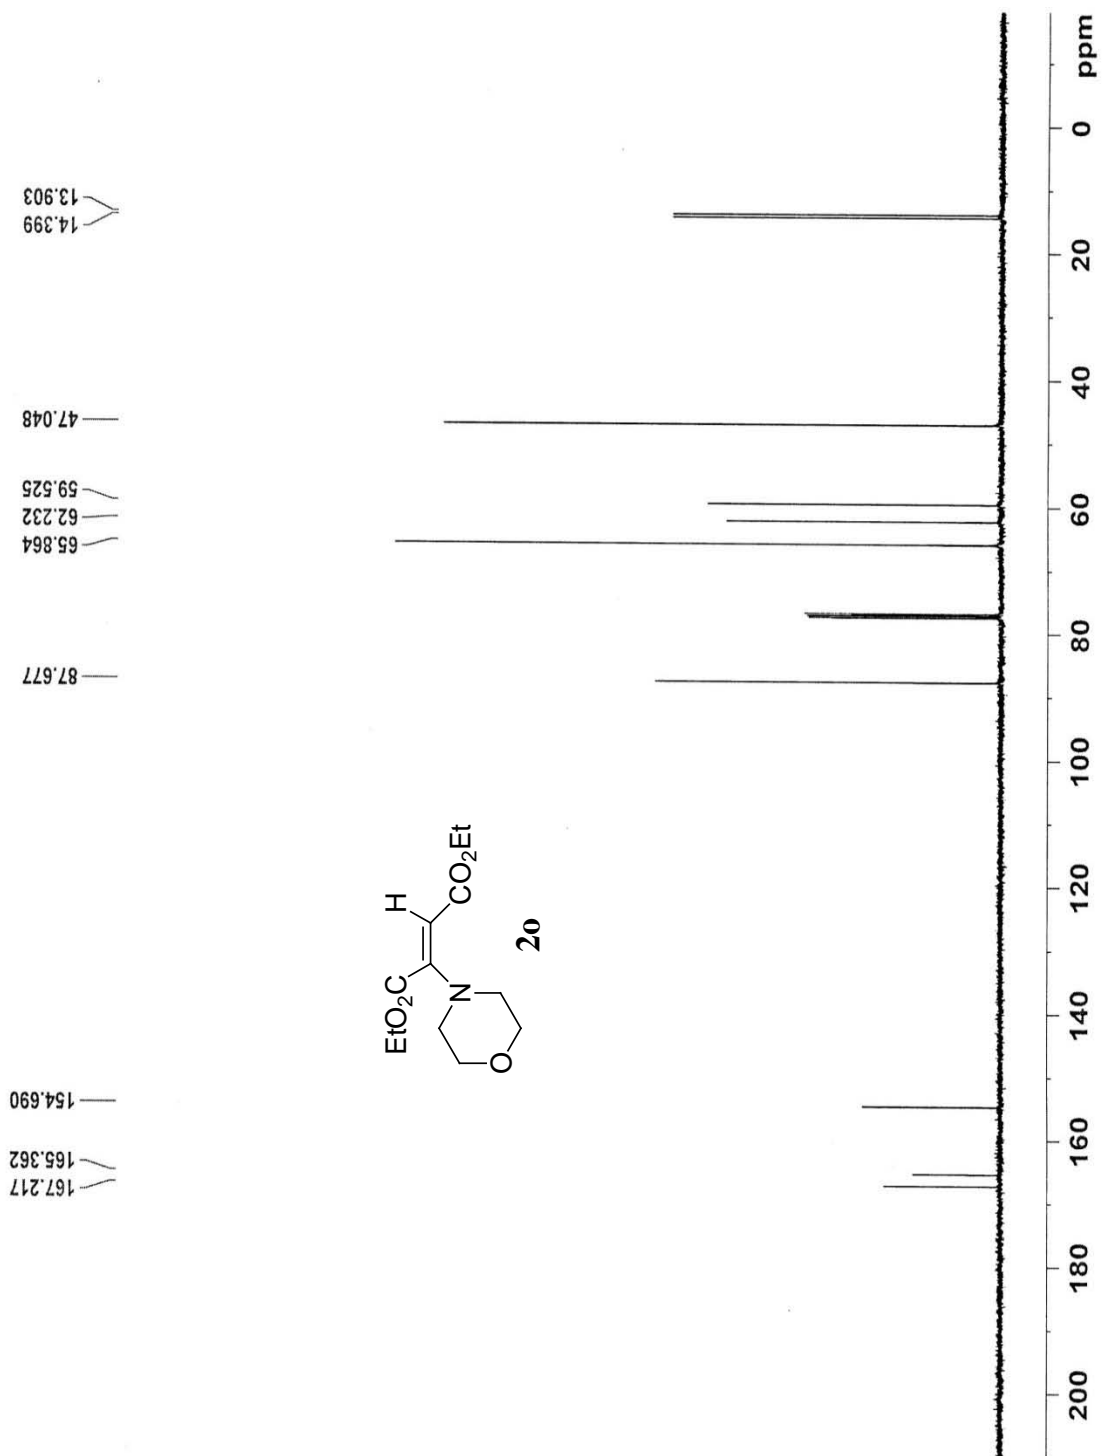

Supplementary Data

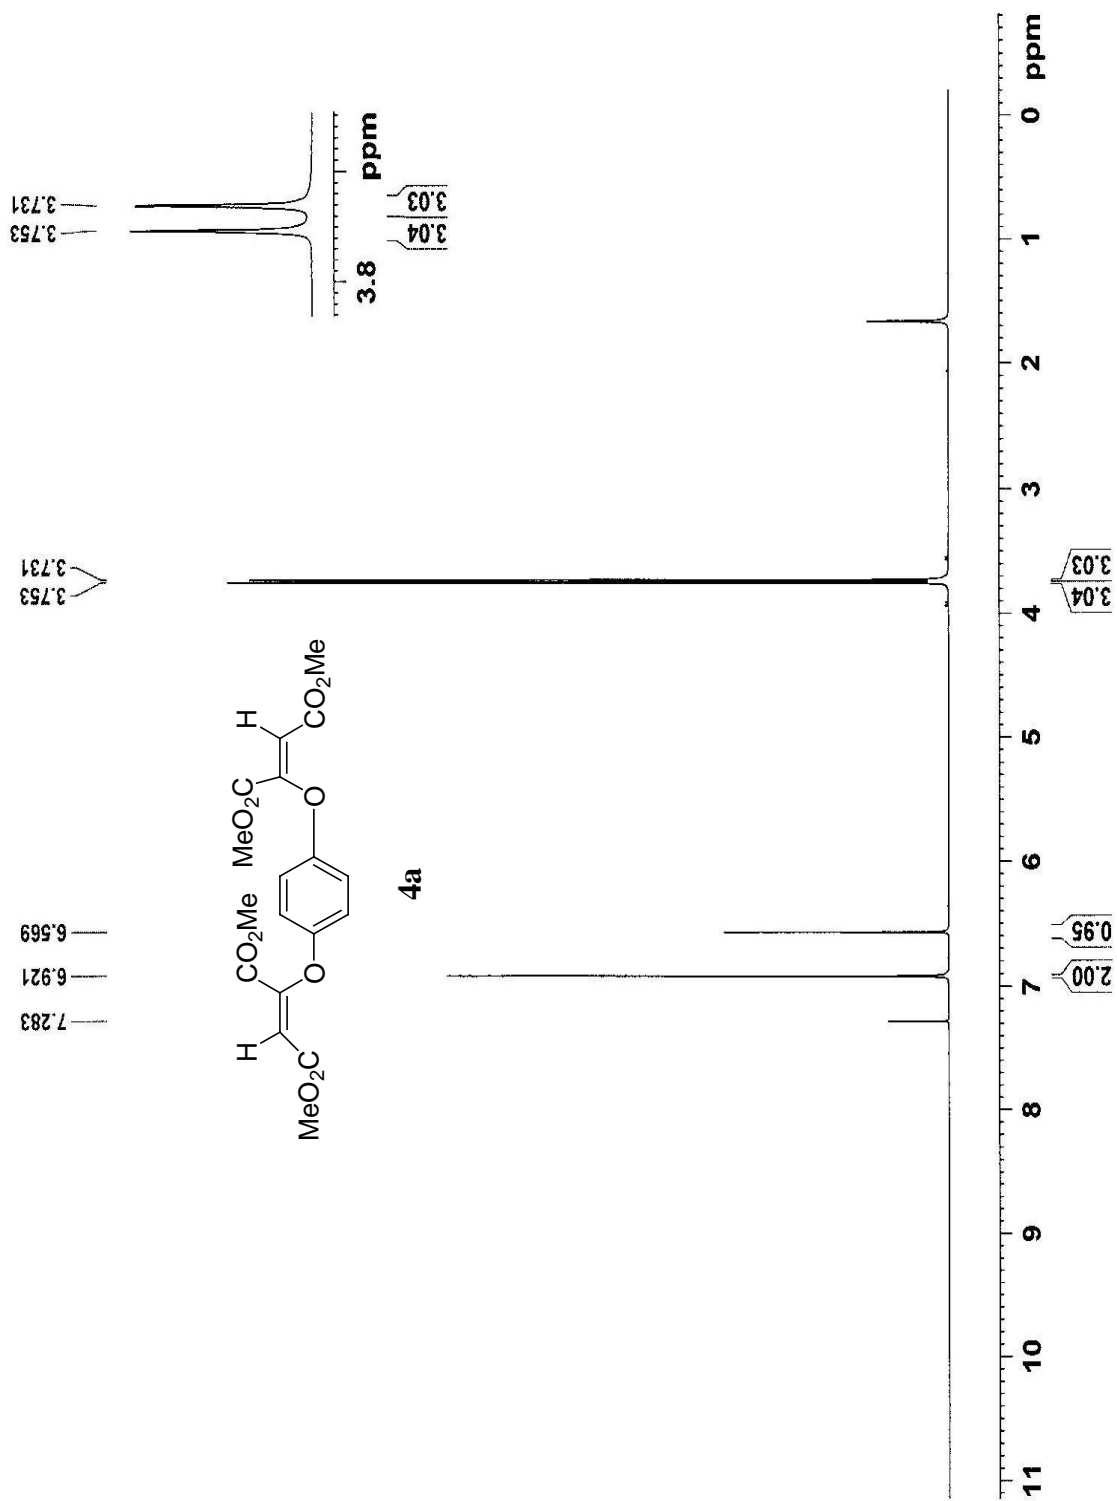

Supplementary Data

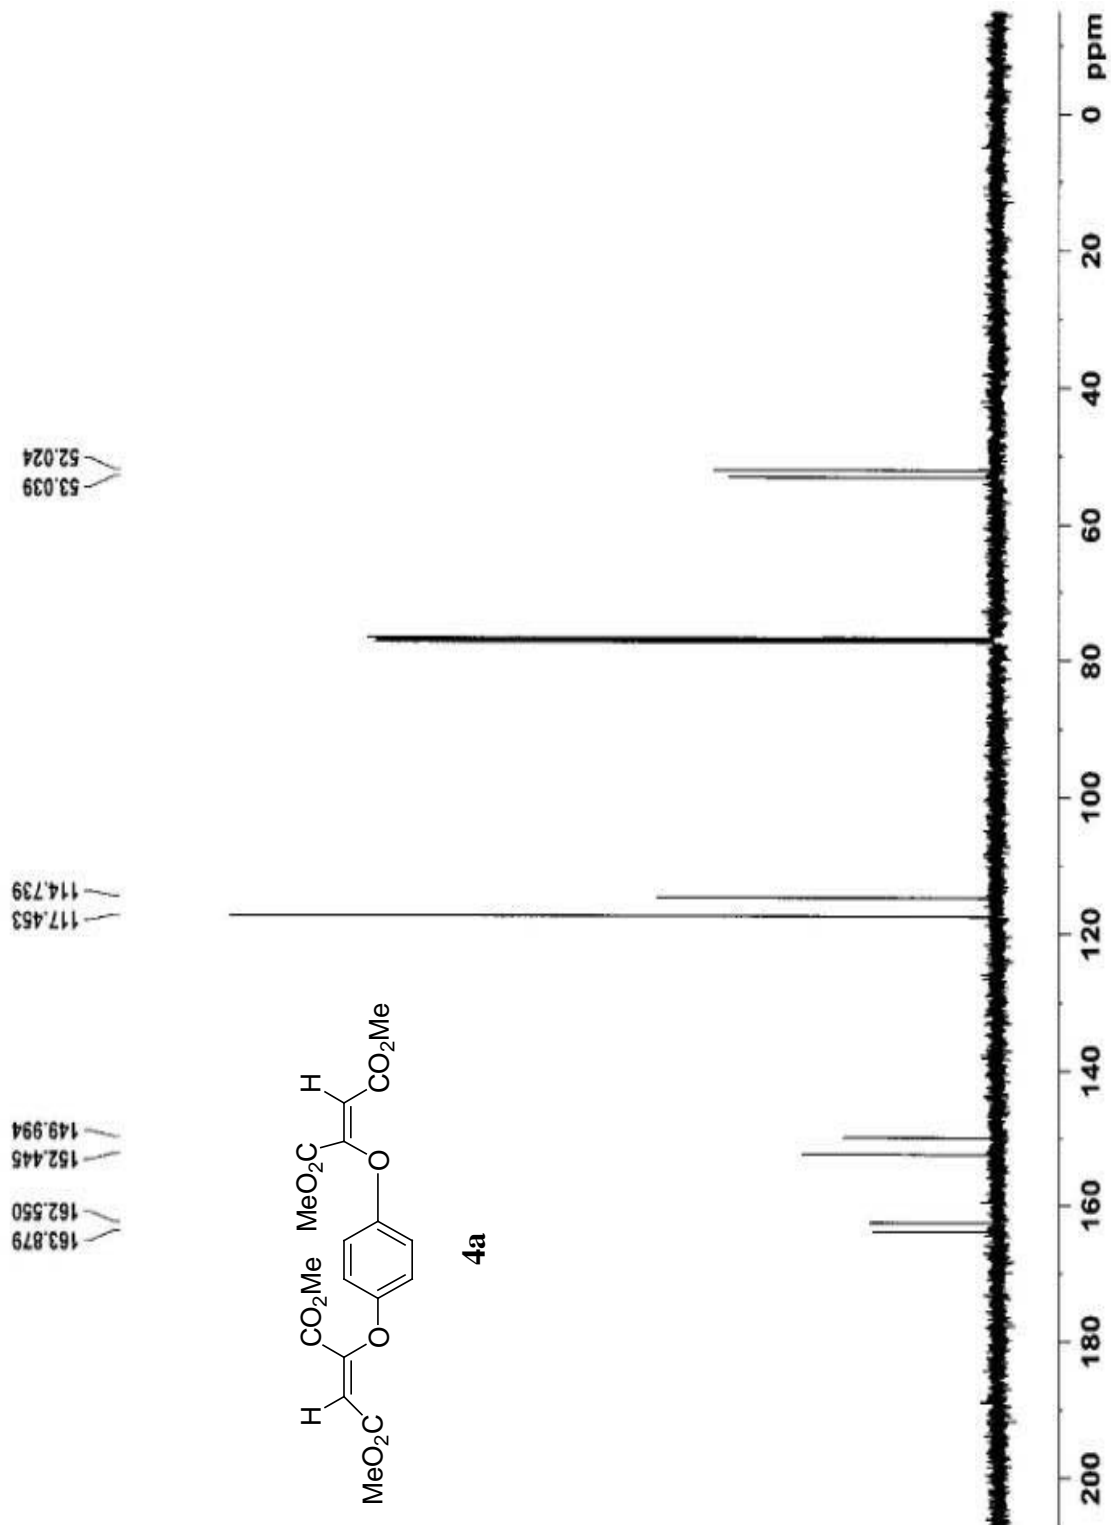

Supplementary Data

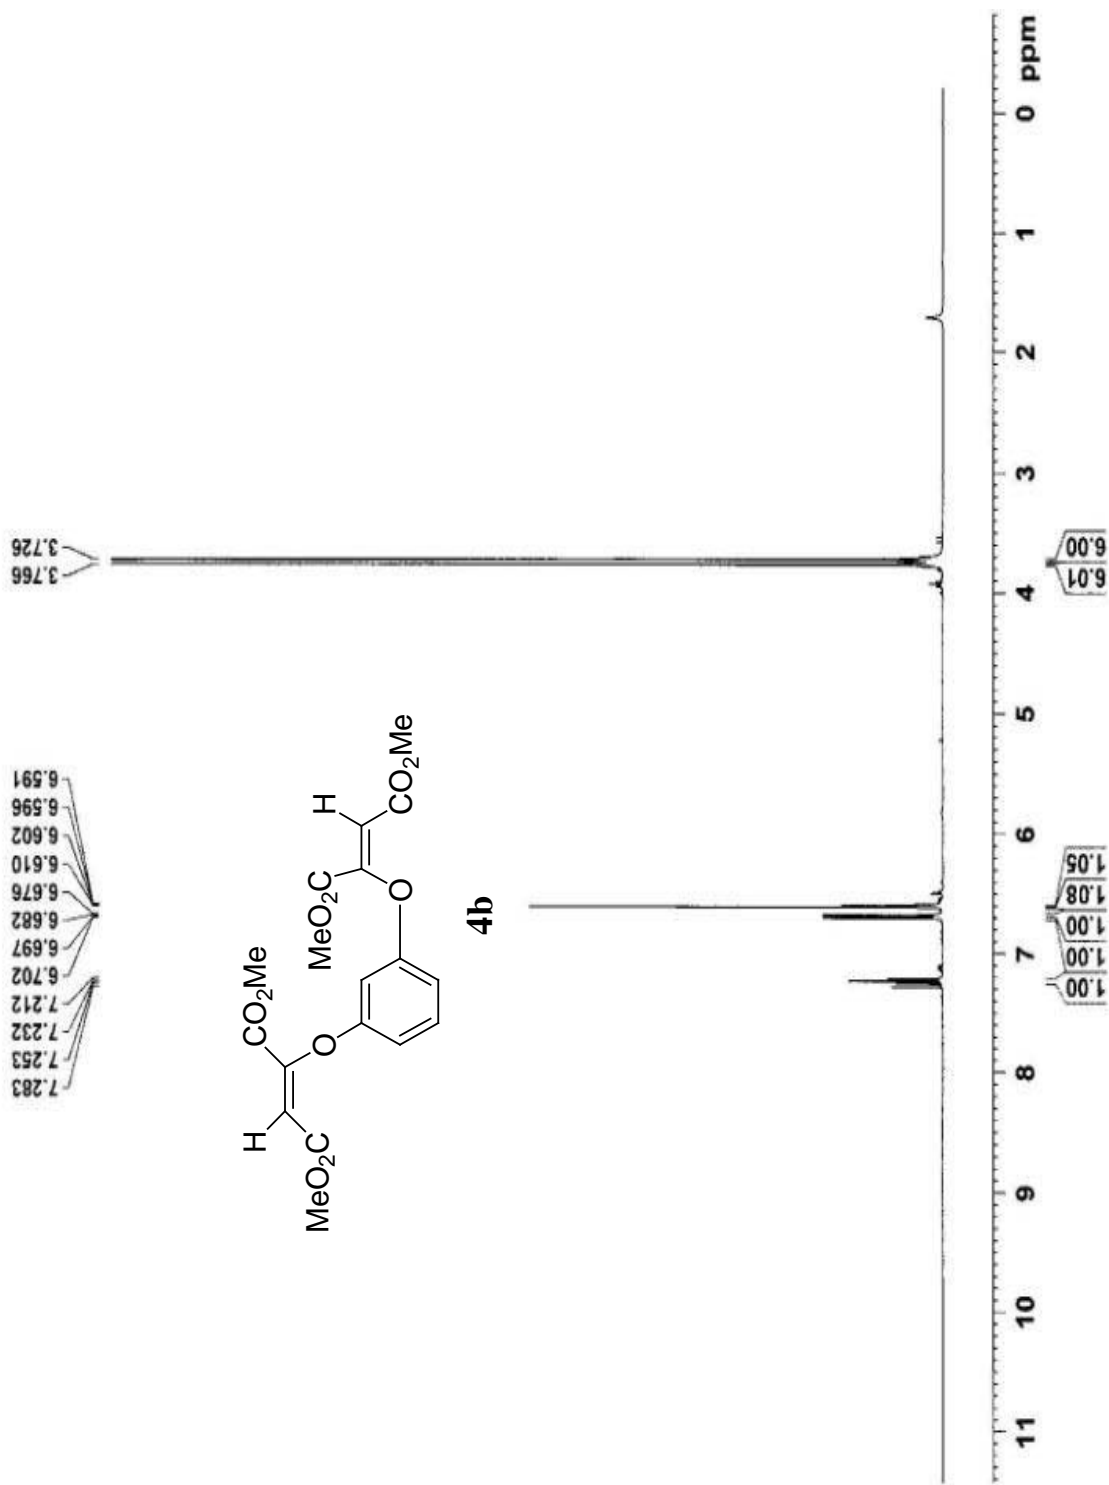

Supplementary Data

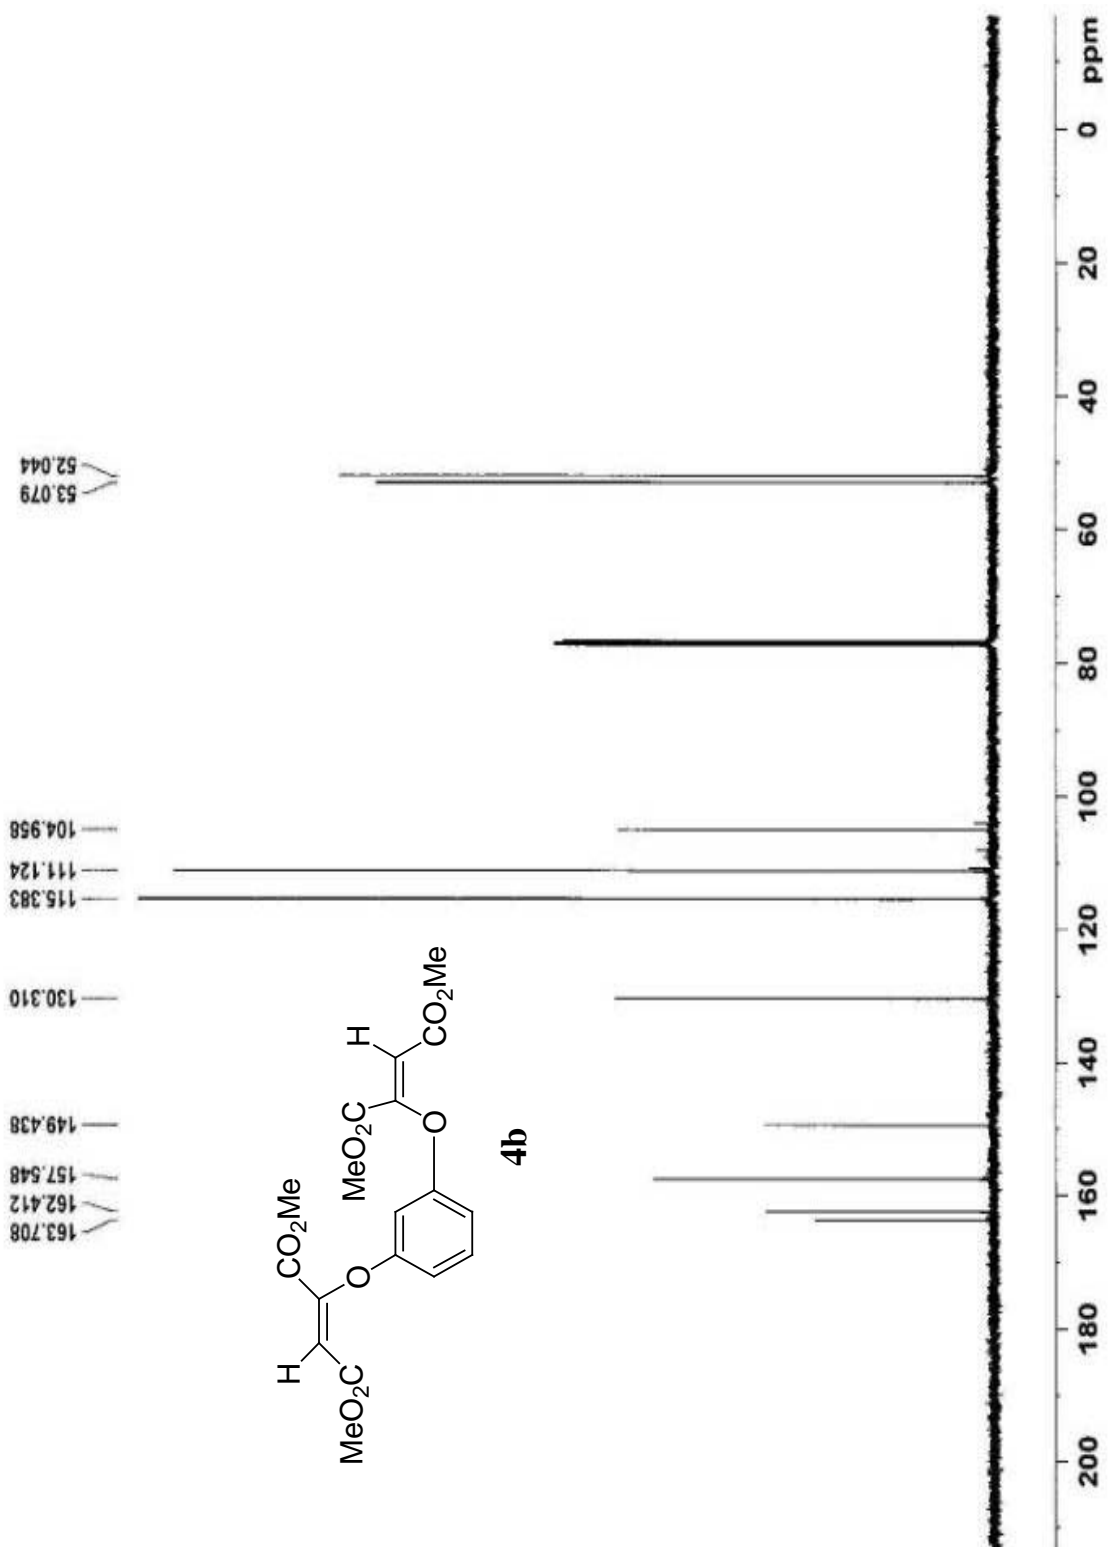

Supplementary Data

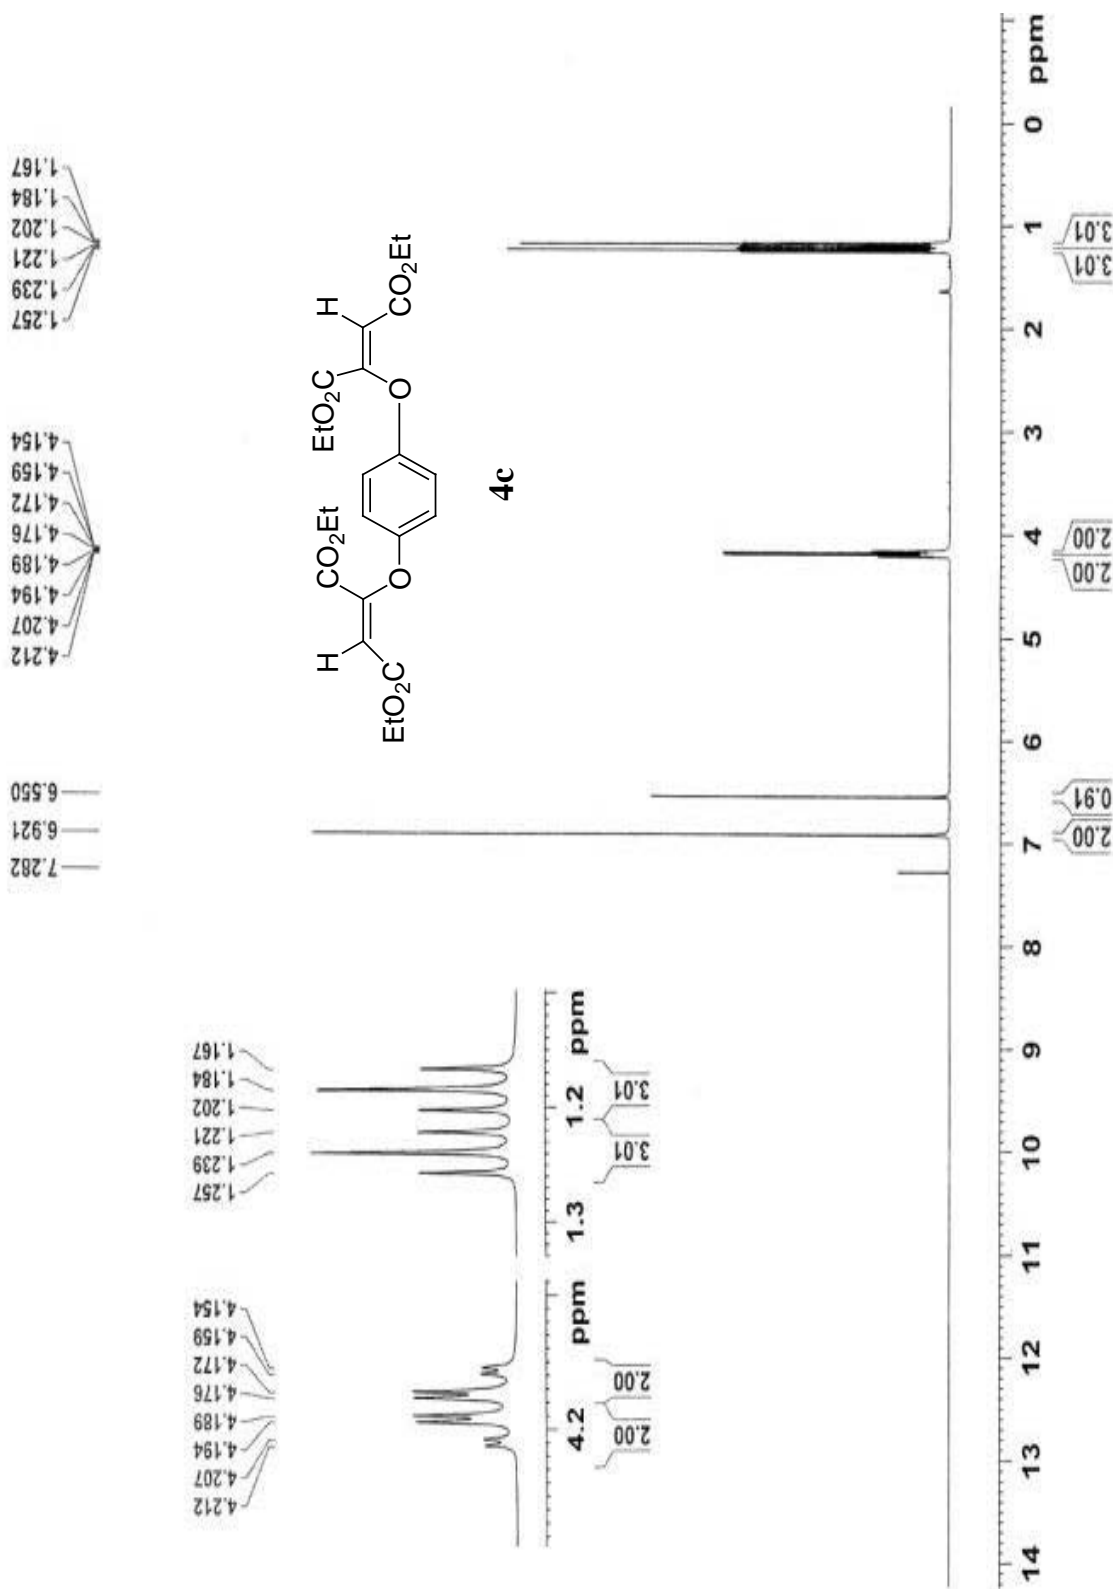

Supplementary Data

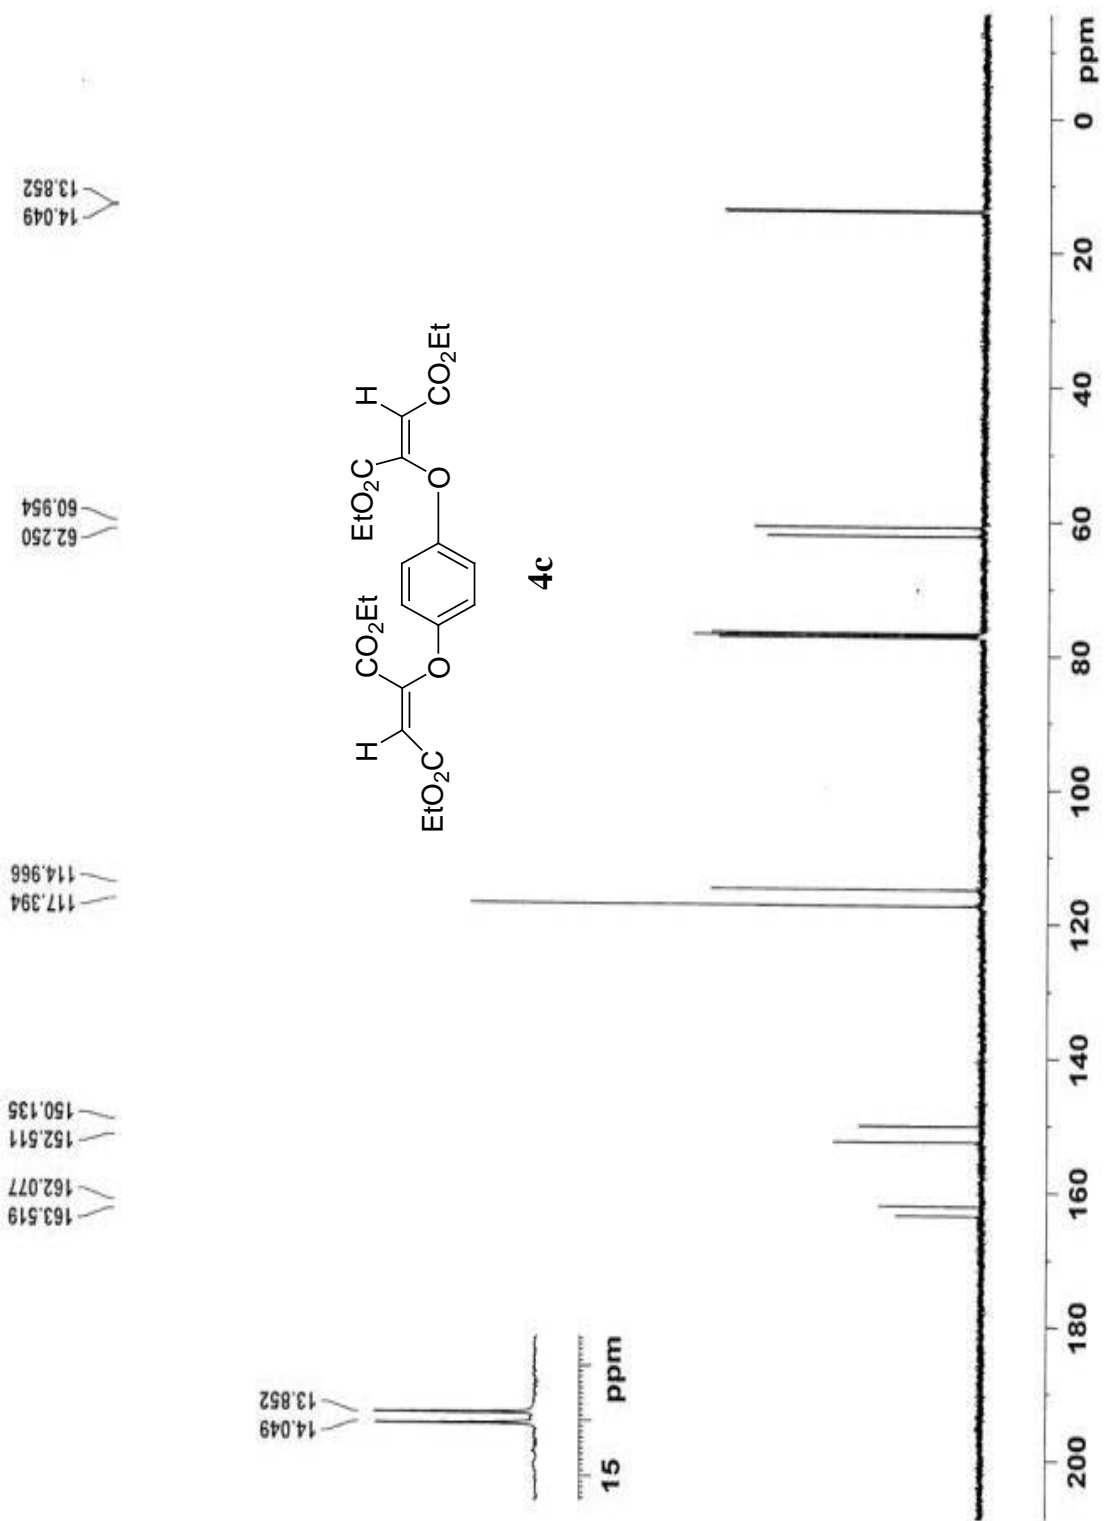



Supplementary Data

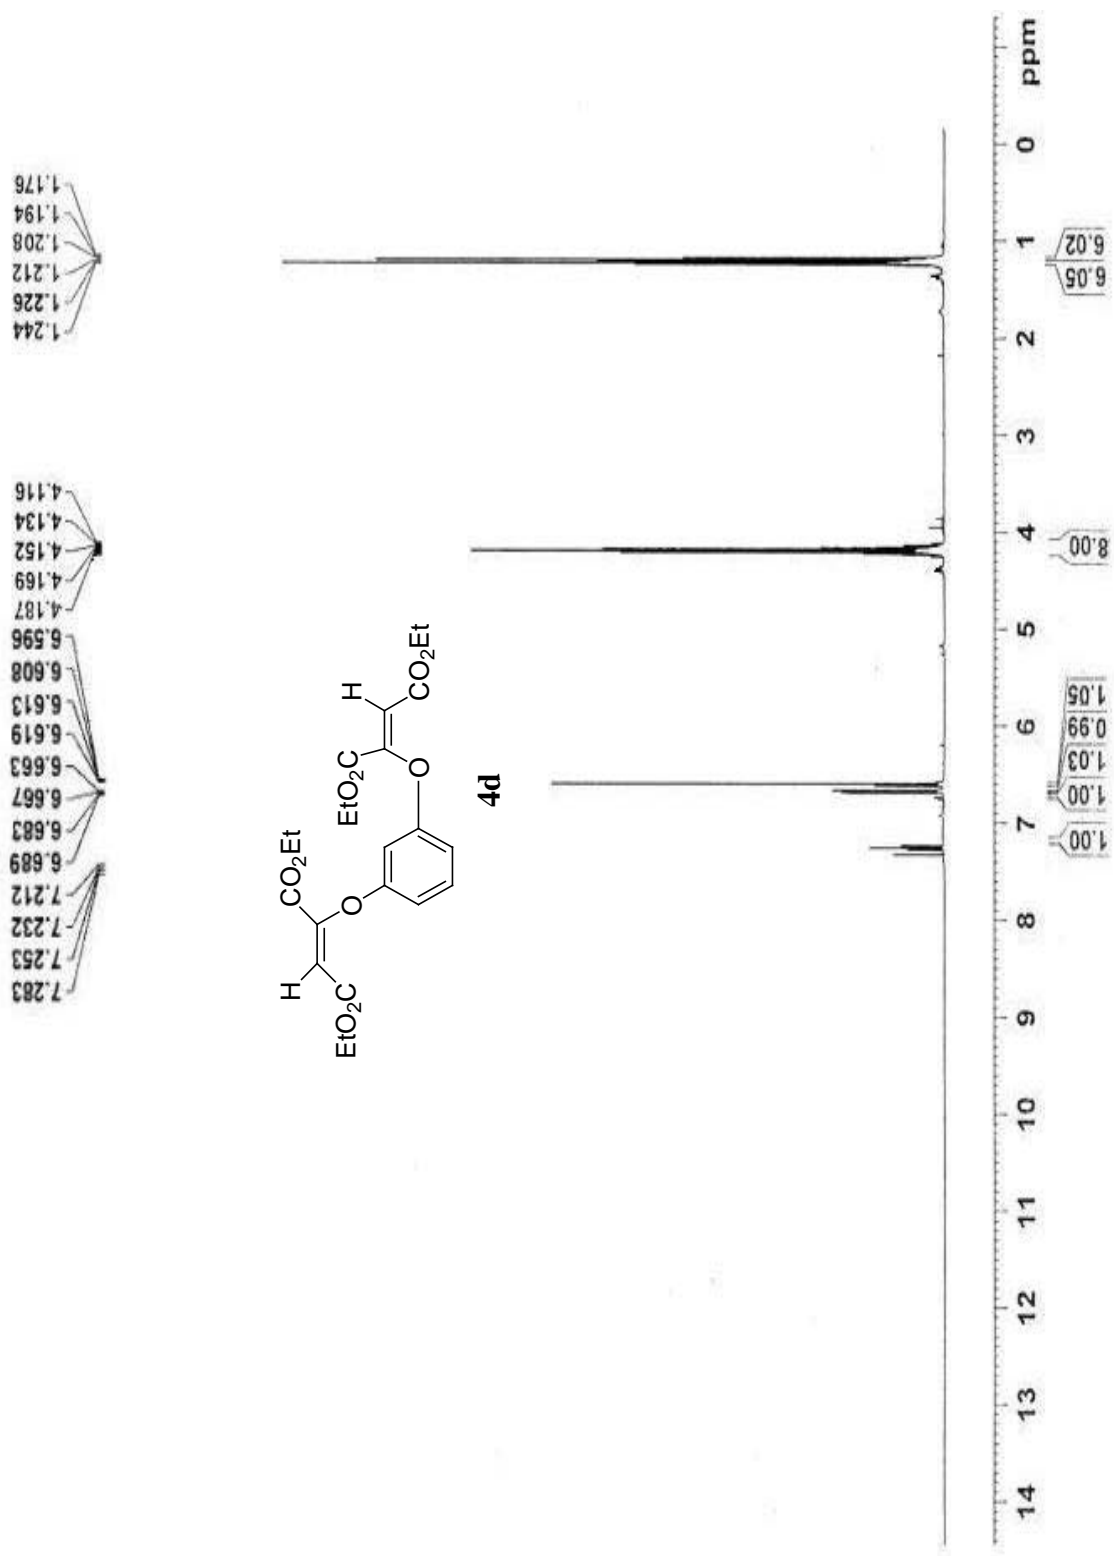

Supplementary Data

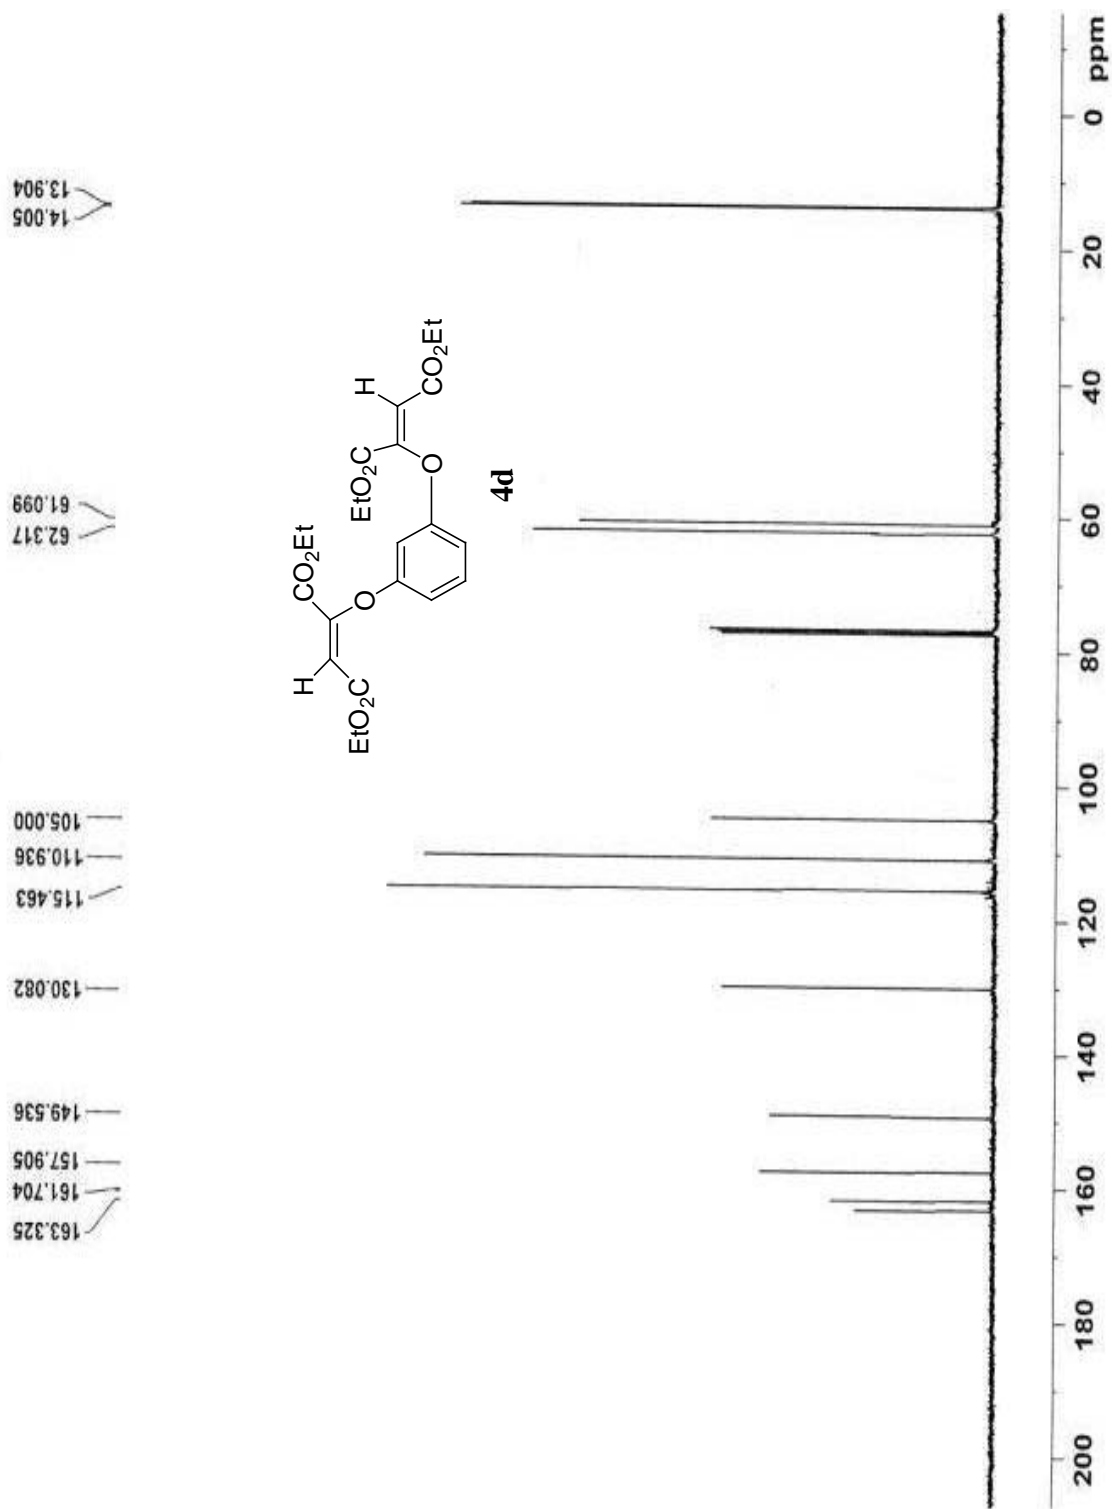

Supplementary Data

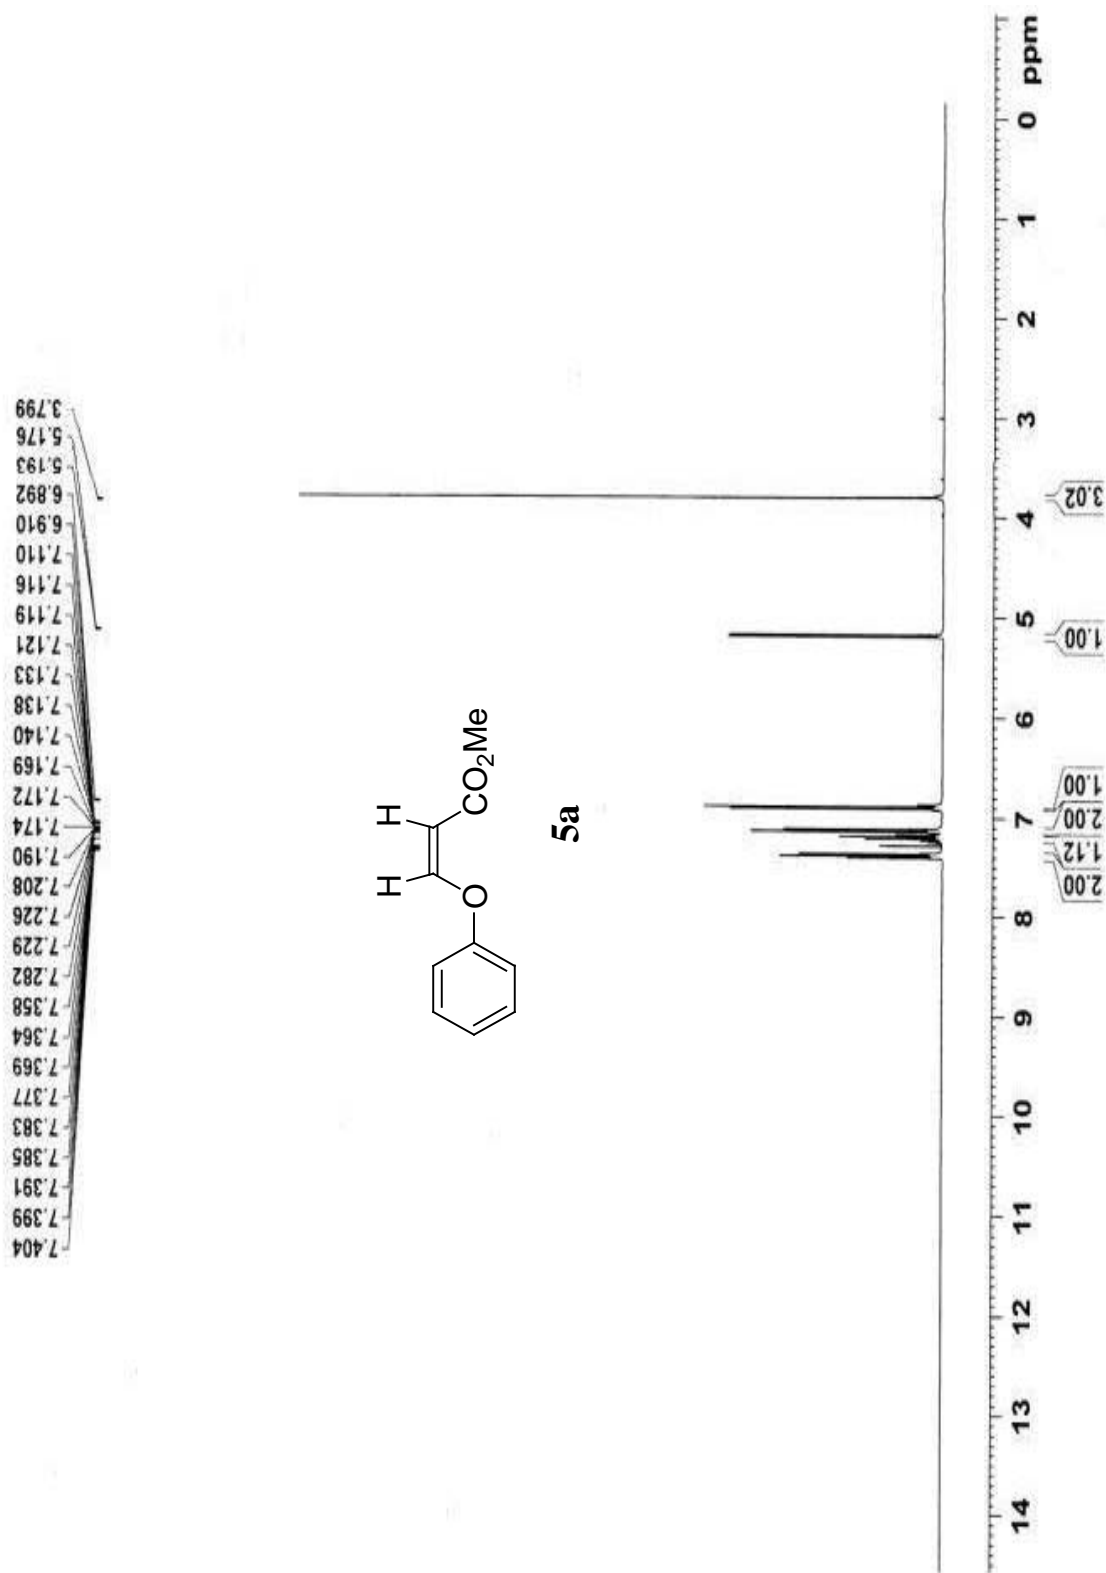

Supplementary Data

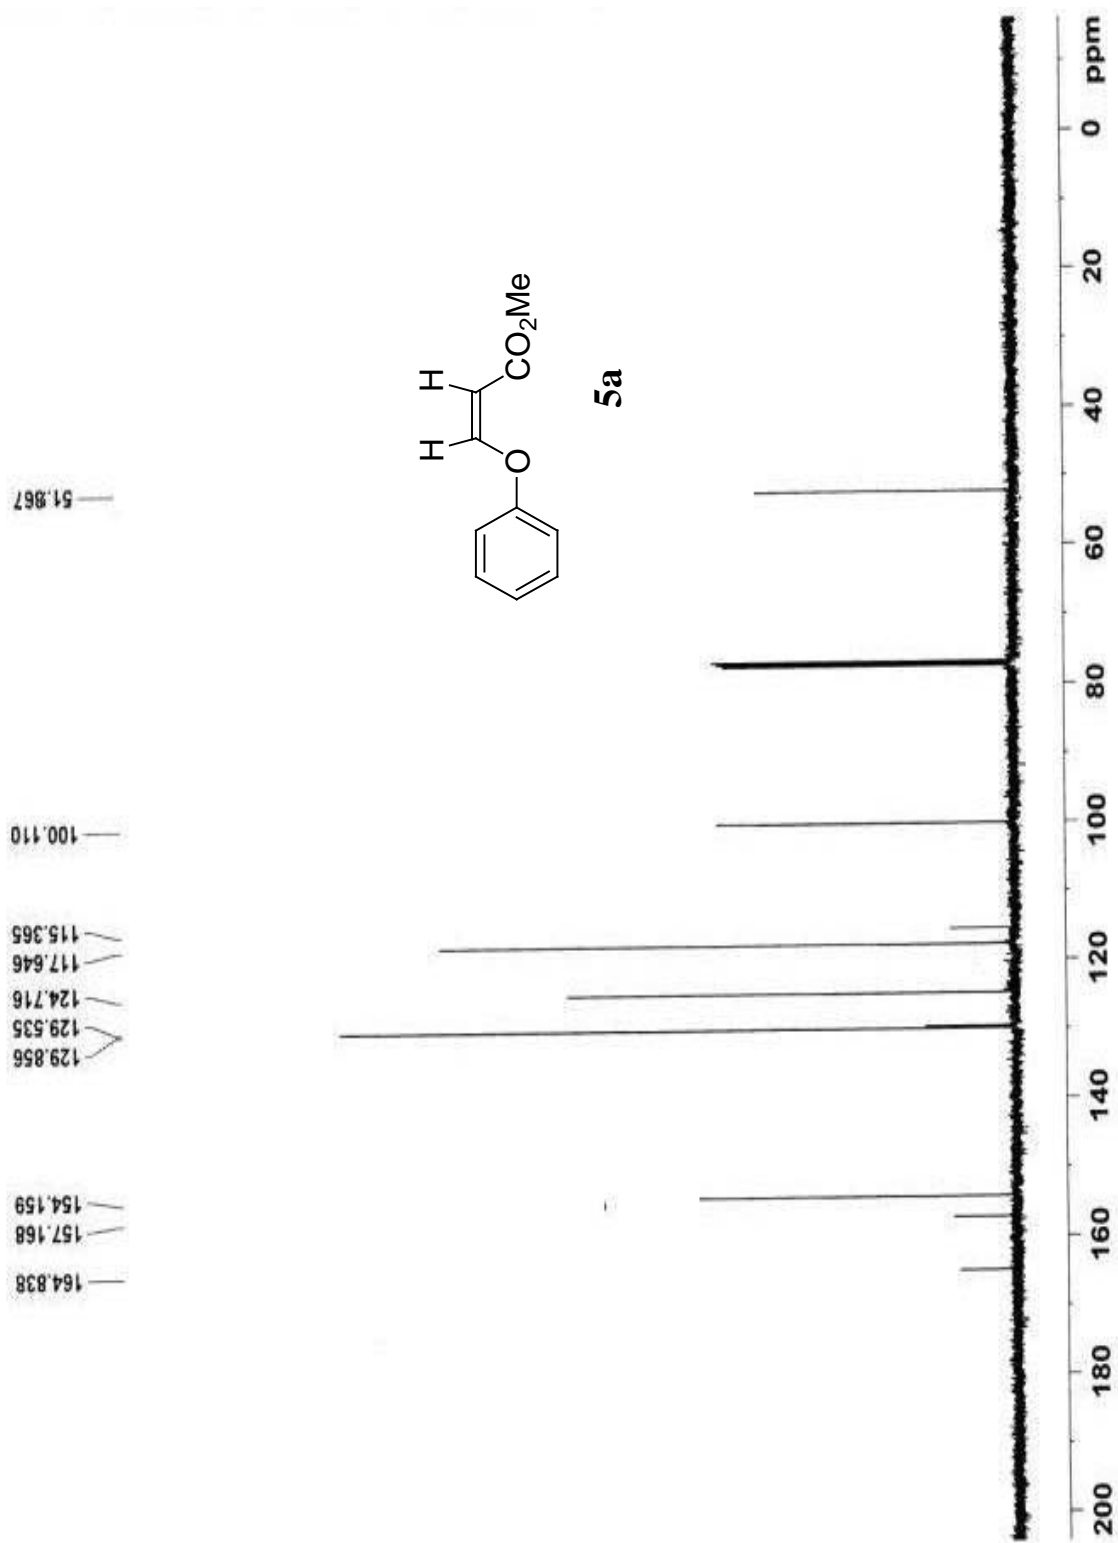

Supplementary Data

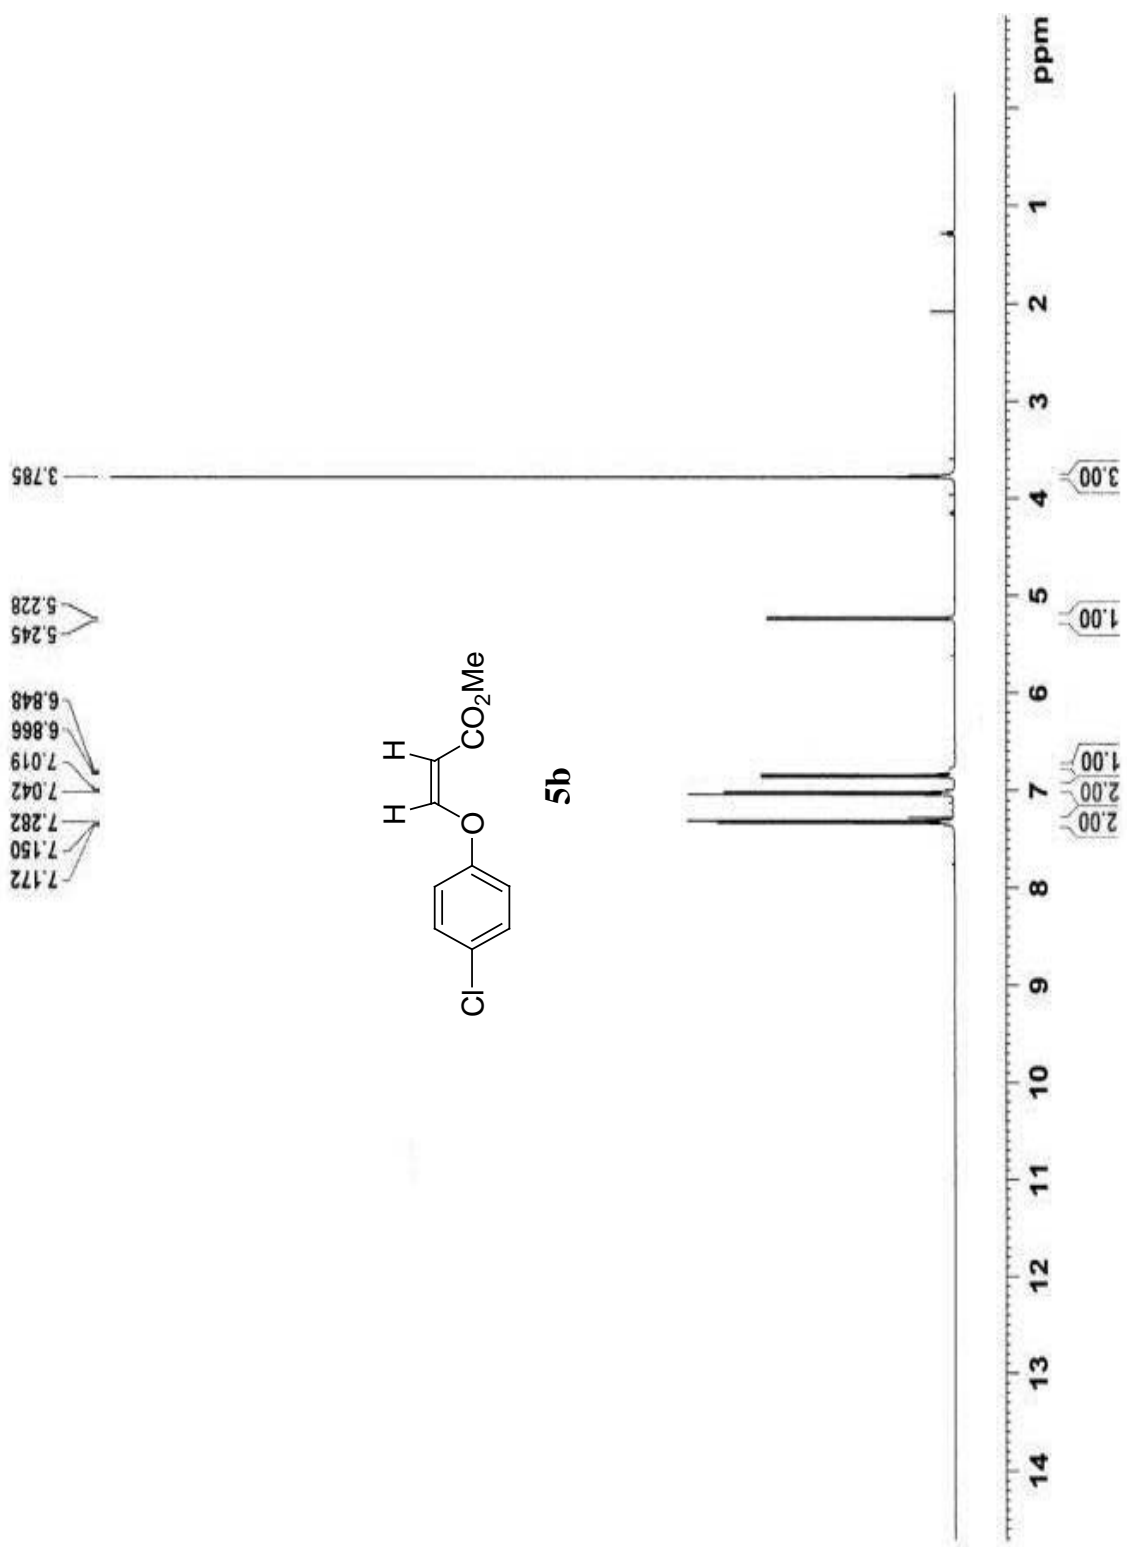

Supplementary Data

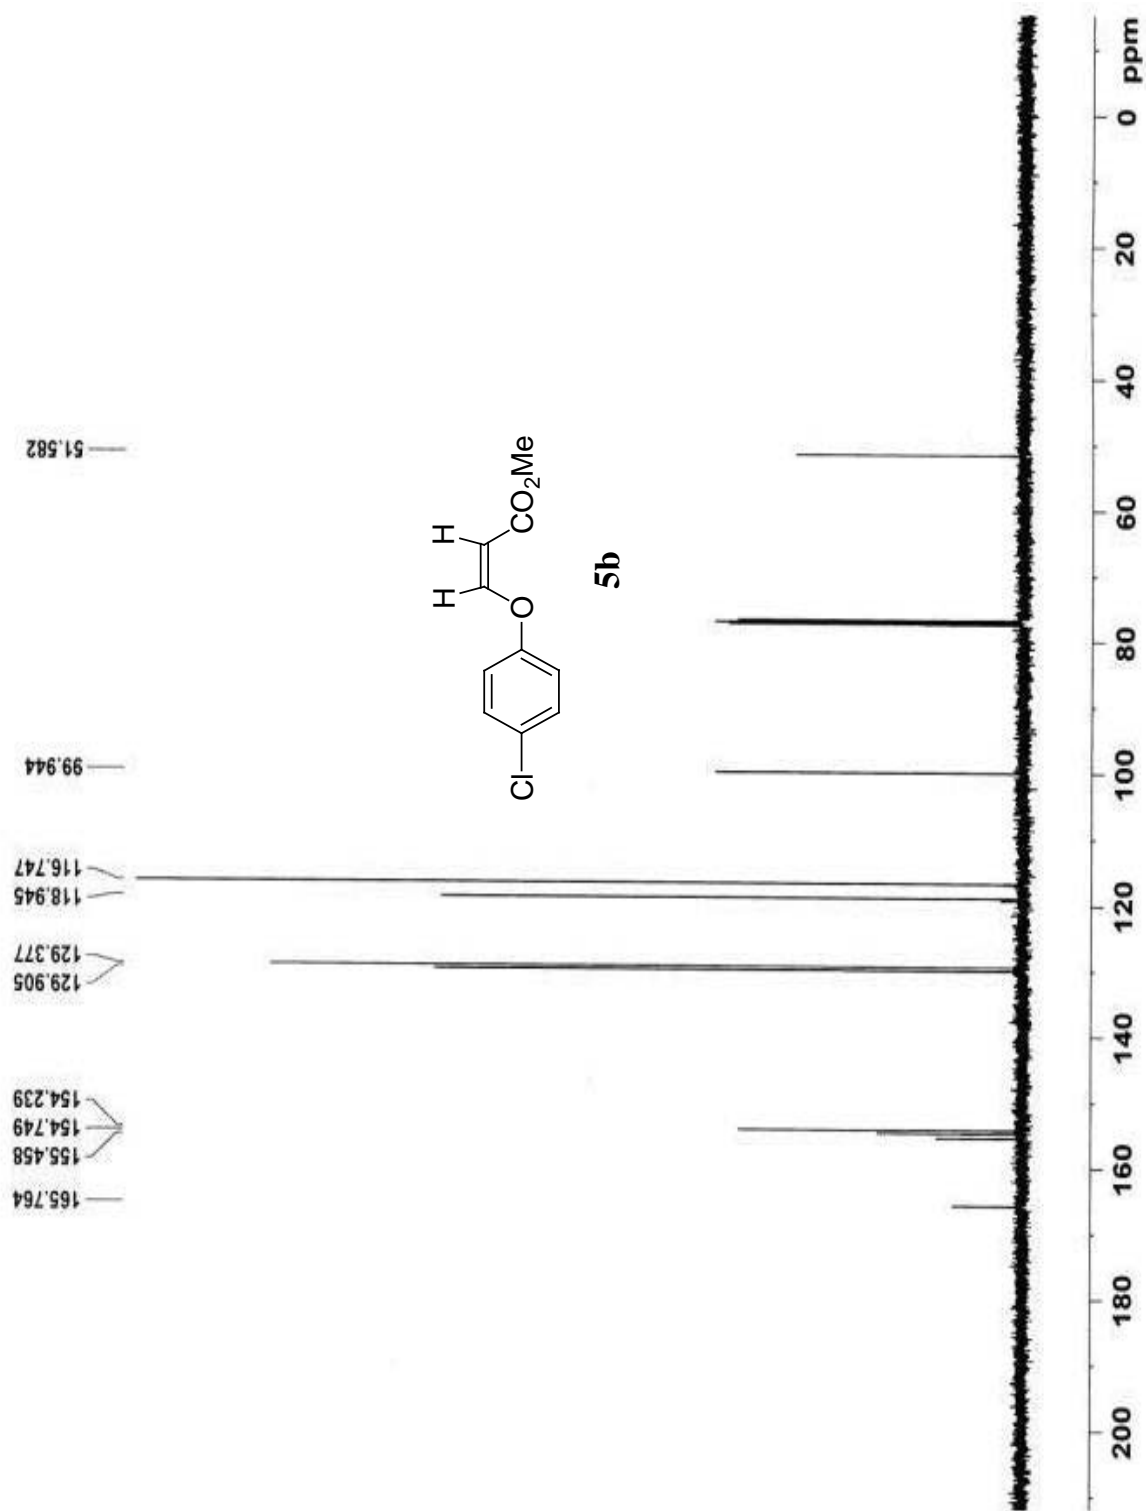

Supplementary Data

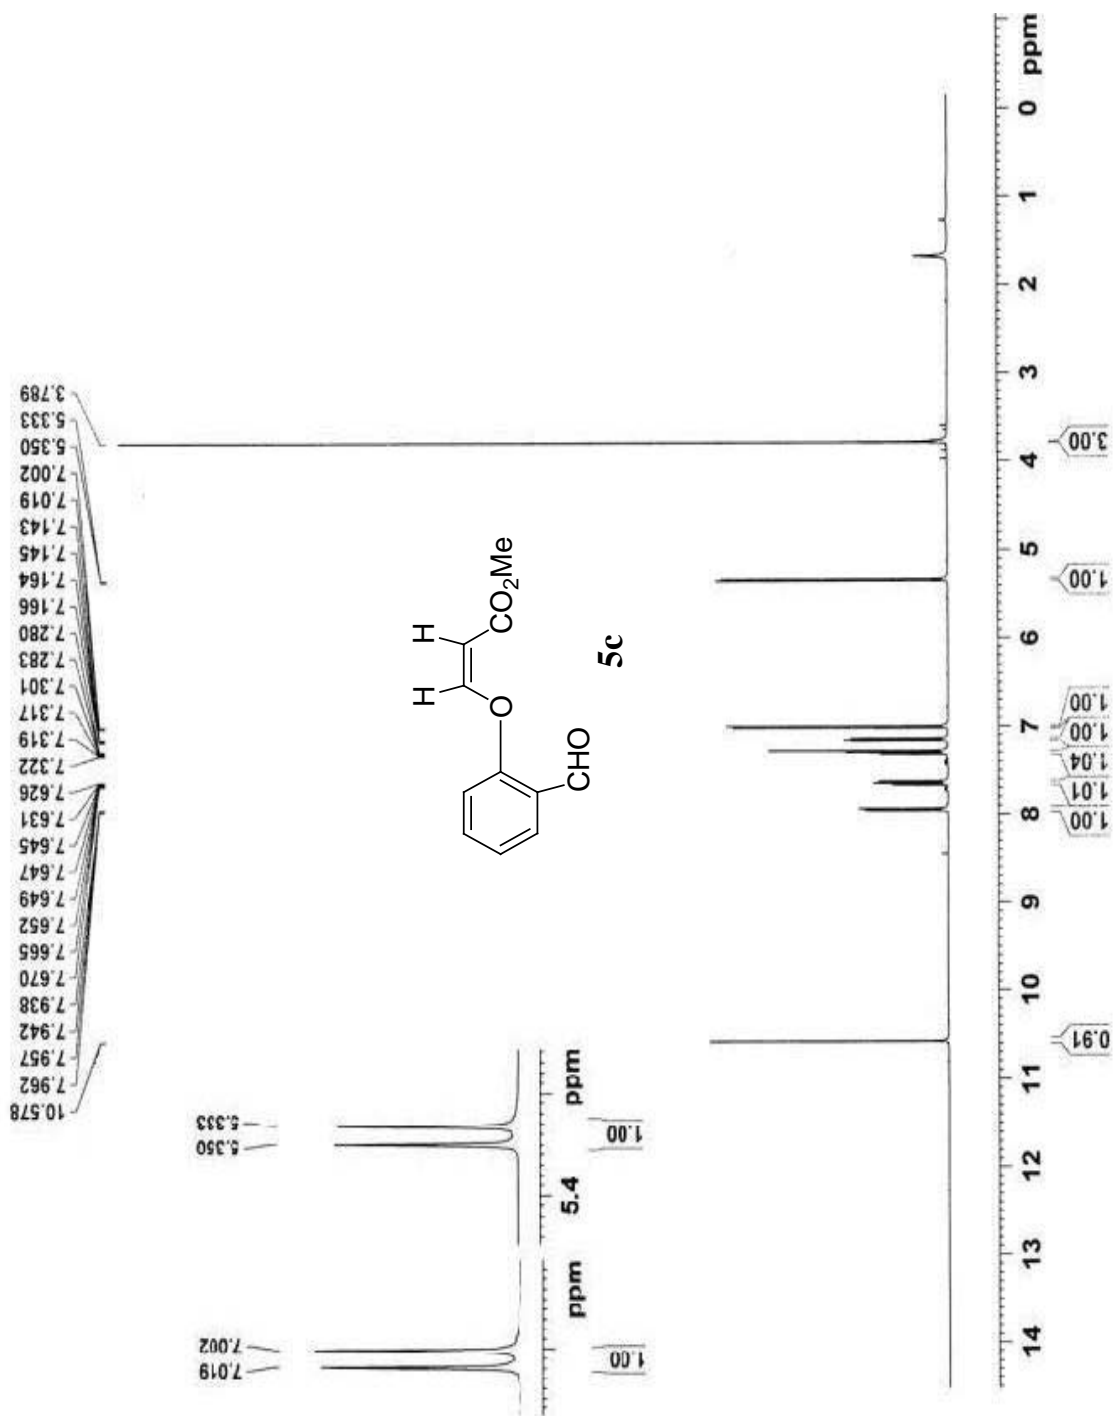

Supplementary Data

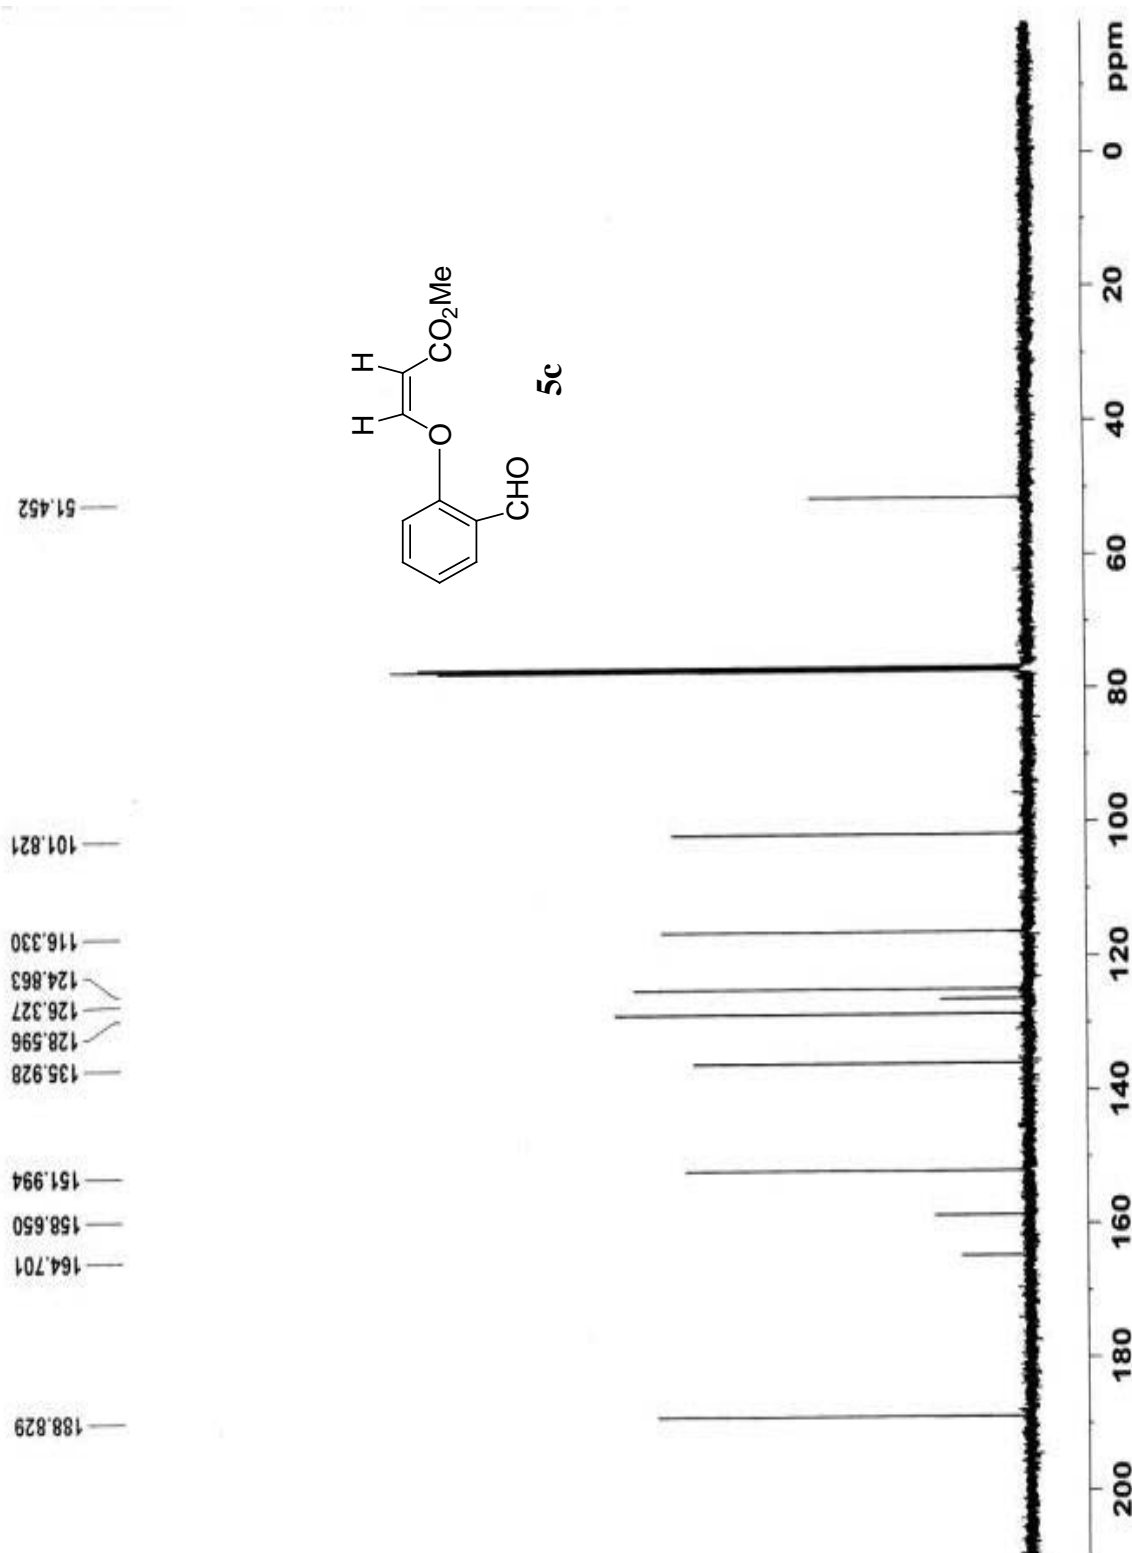



Supplementary Data

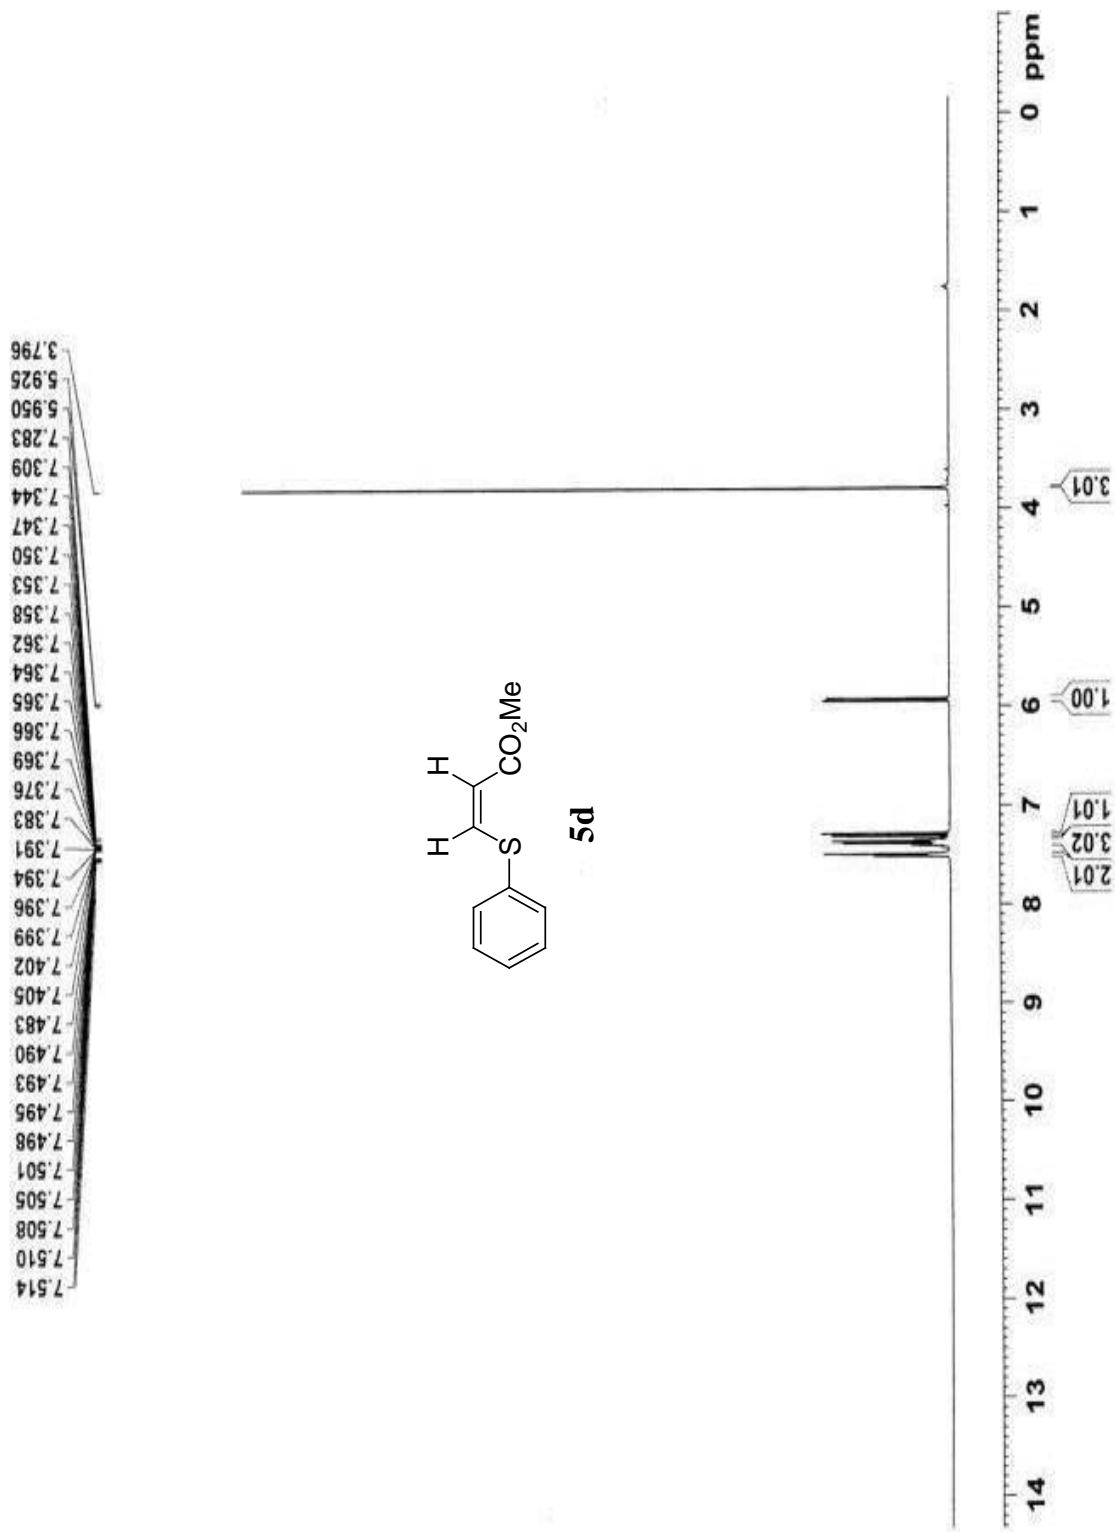

Supplementary Data

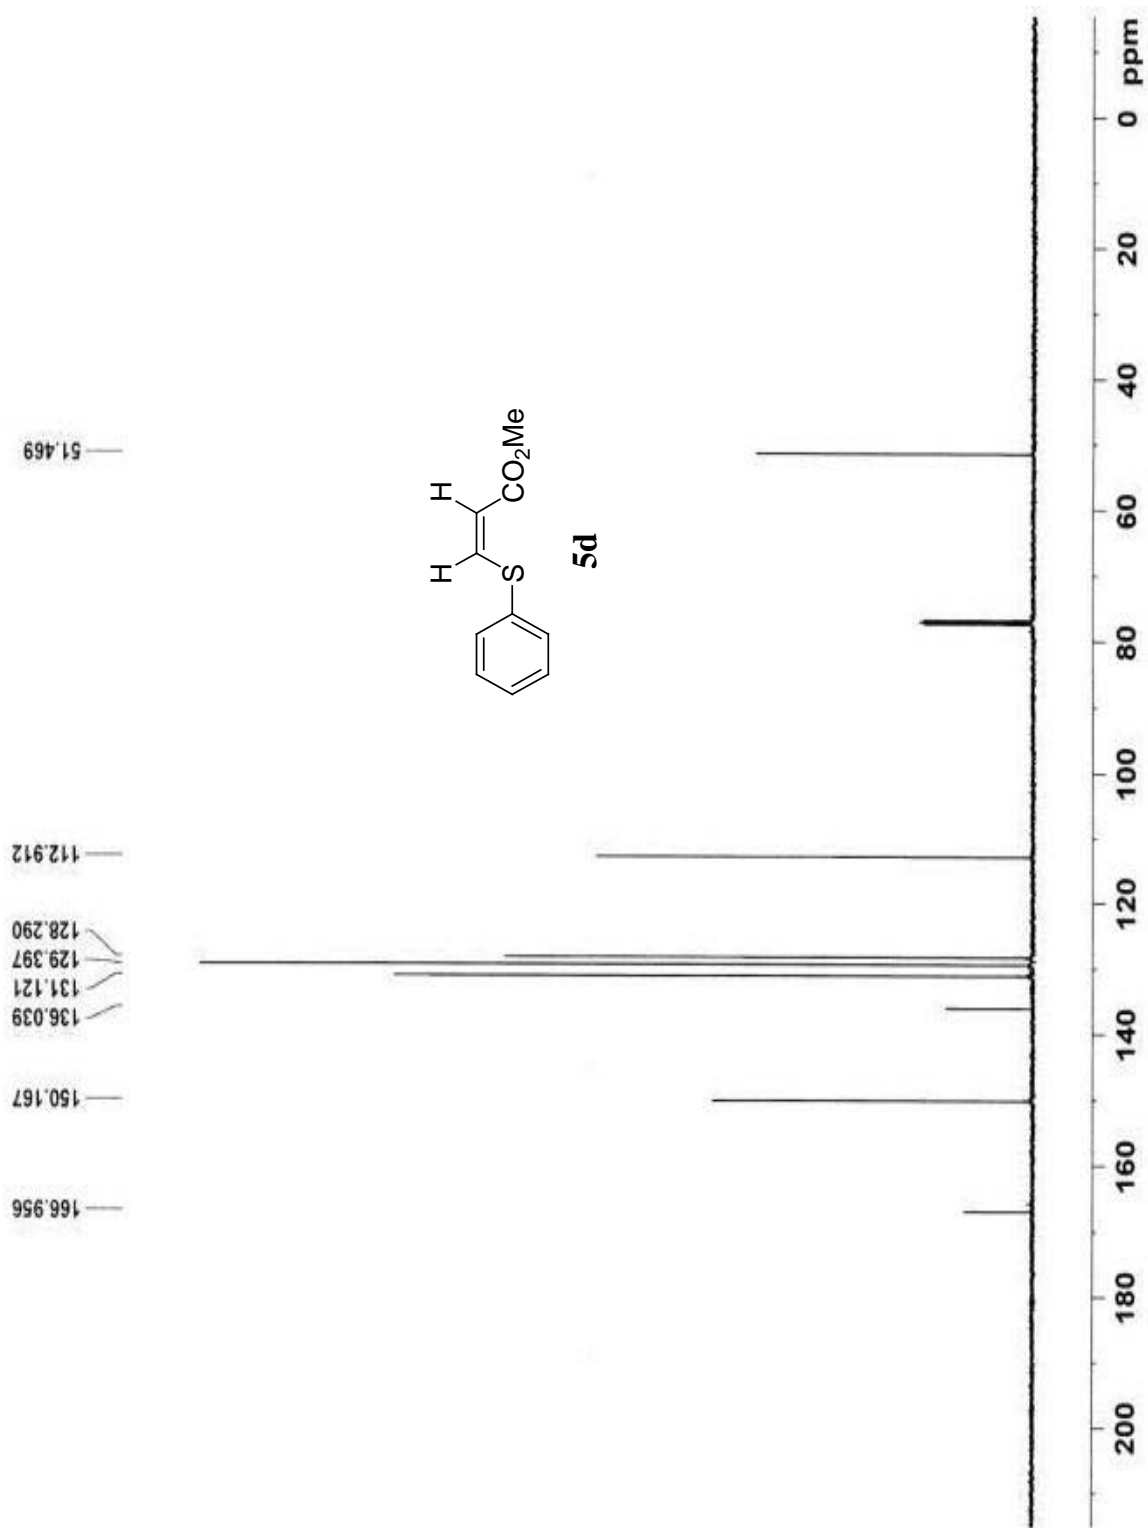

Supplementary Data

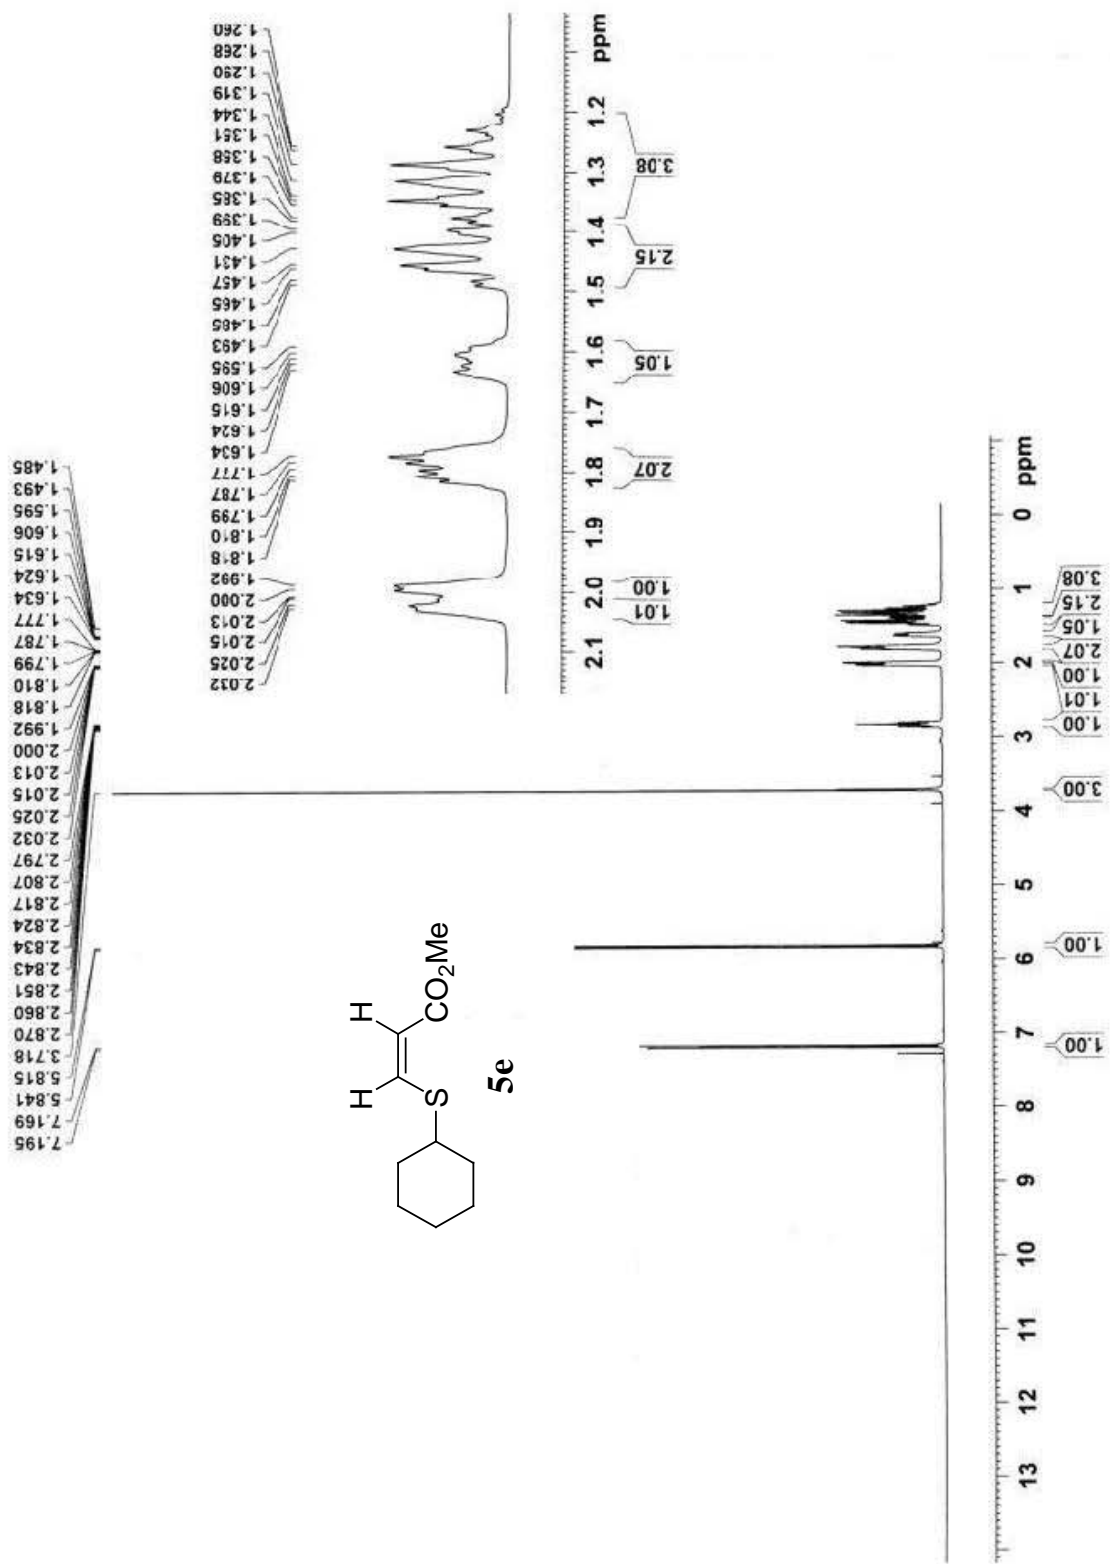

Supplementary Data

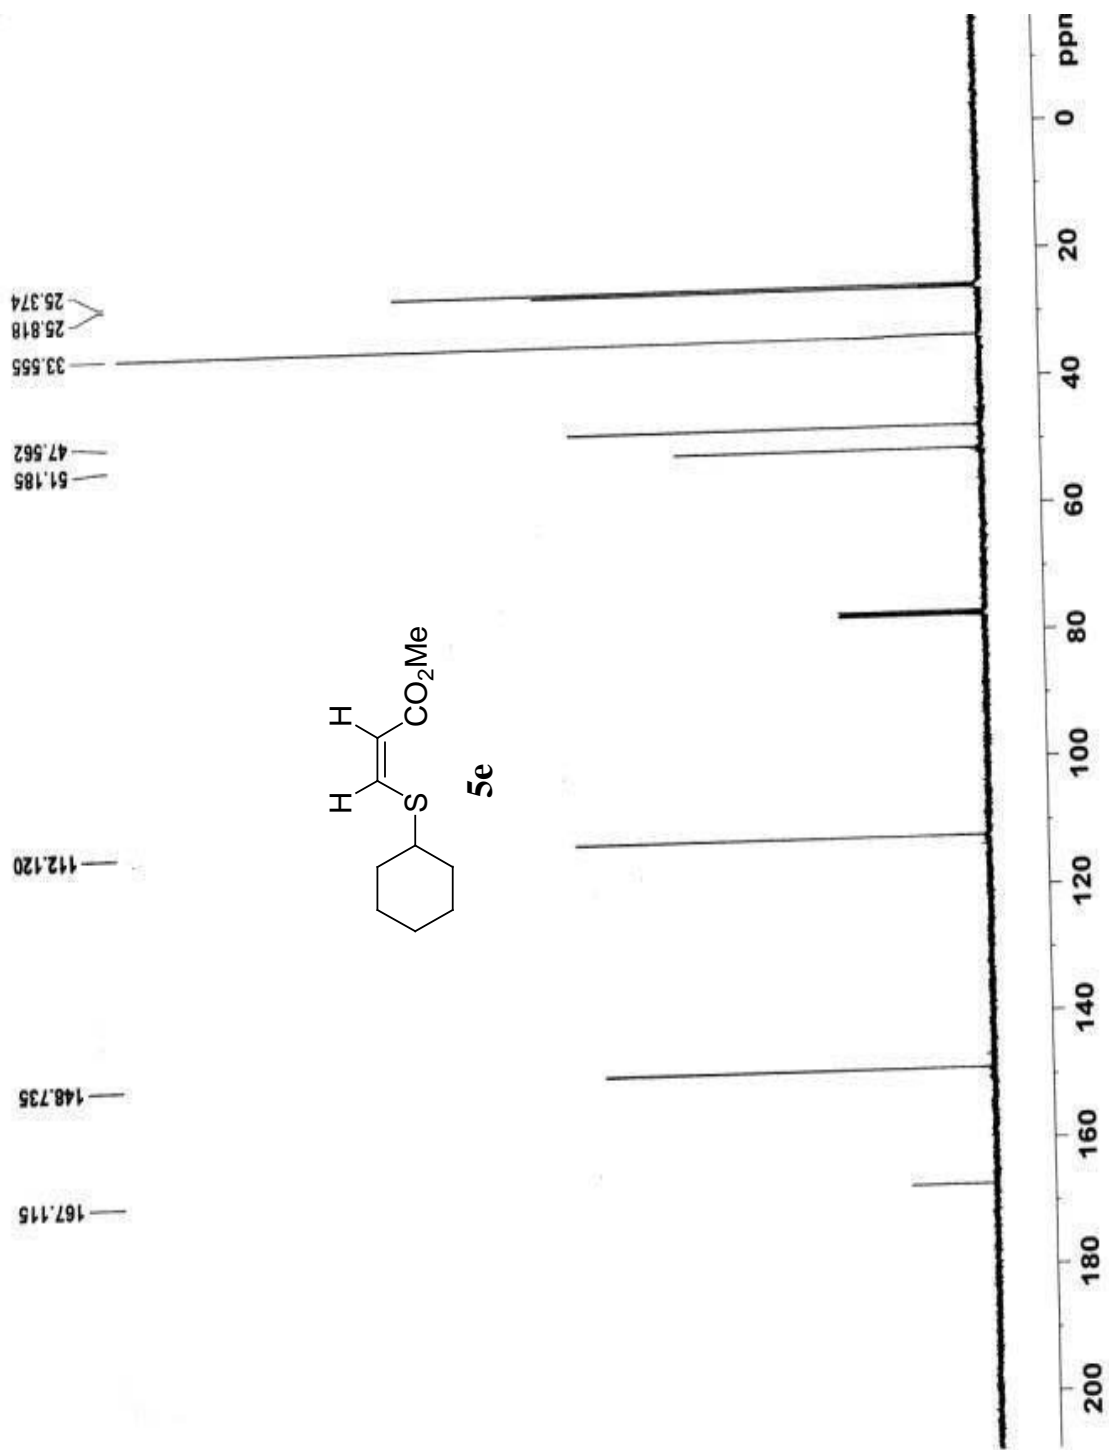

Supplementary Data

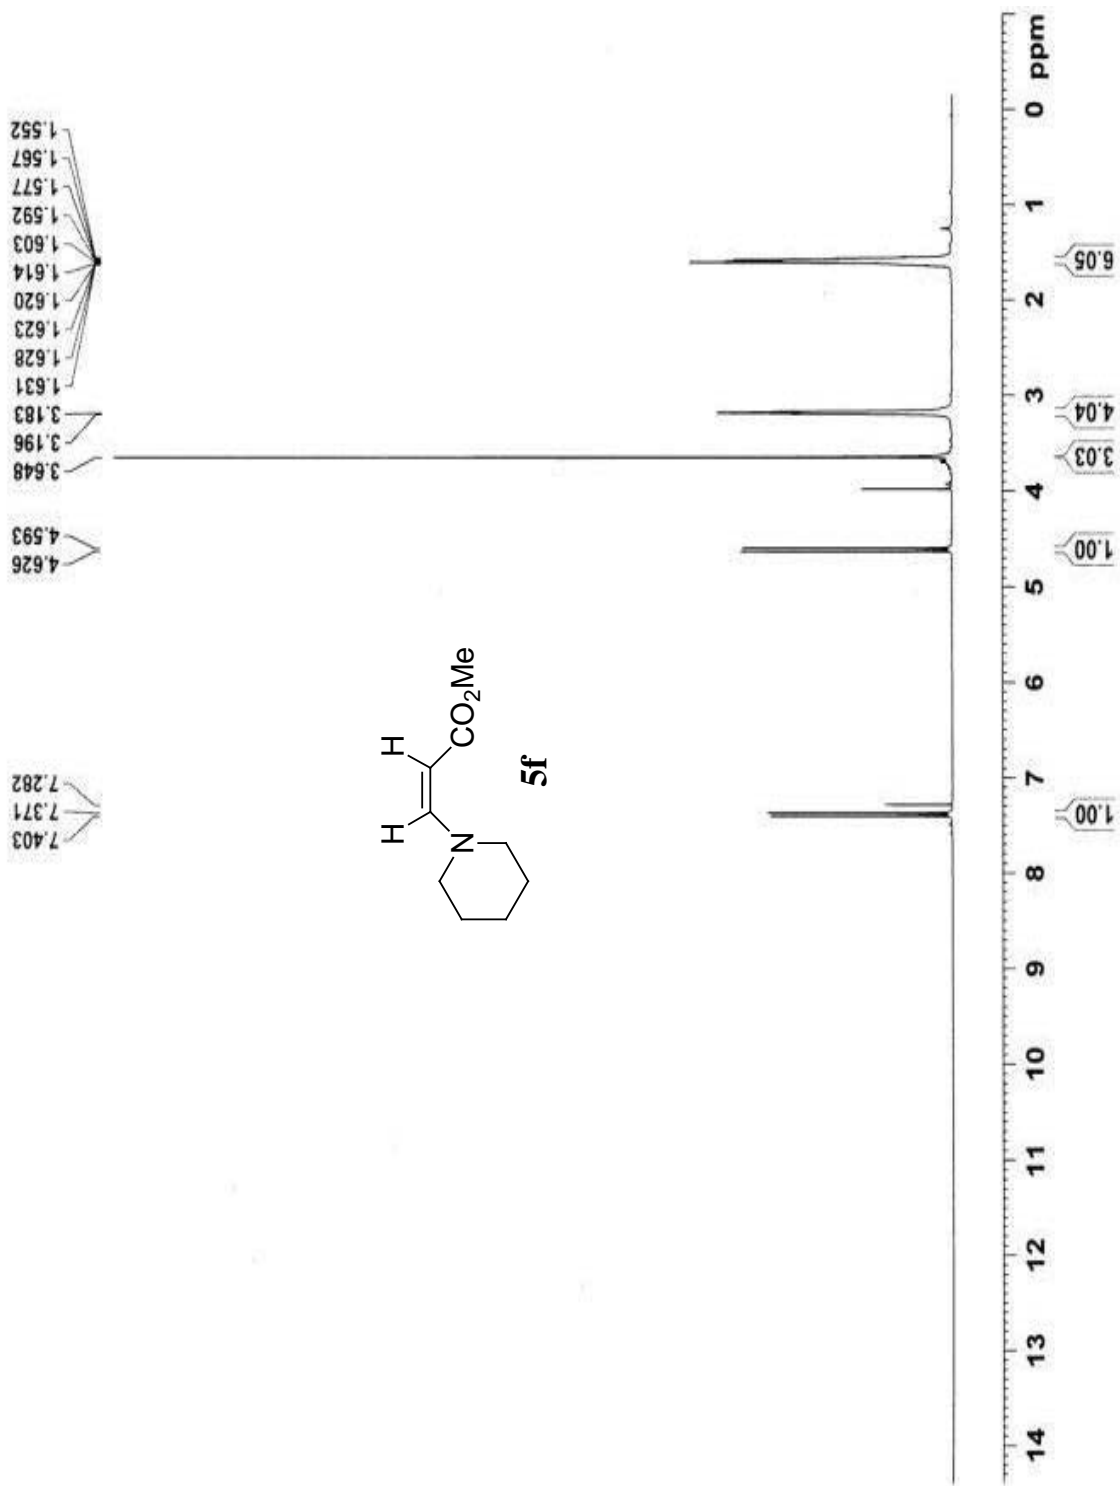

Supplementary Data

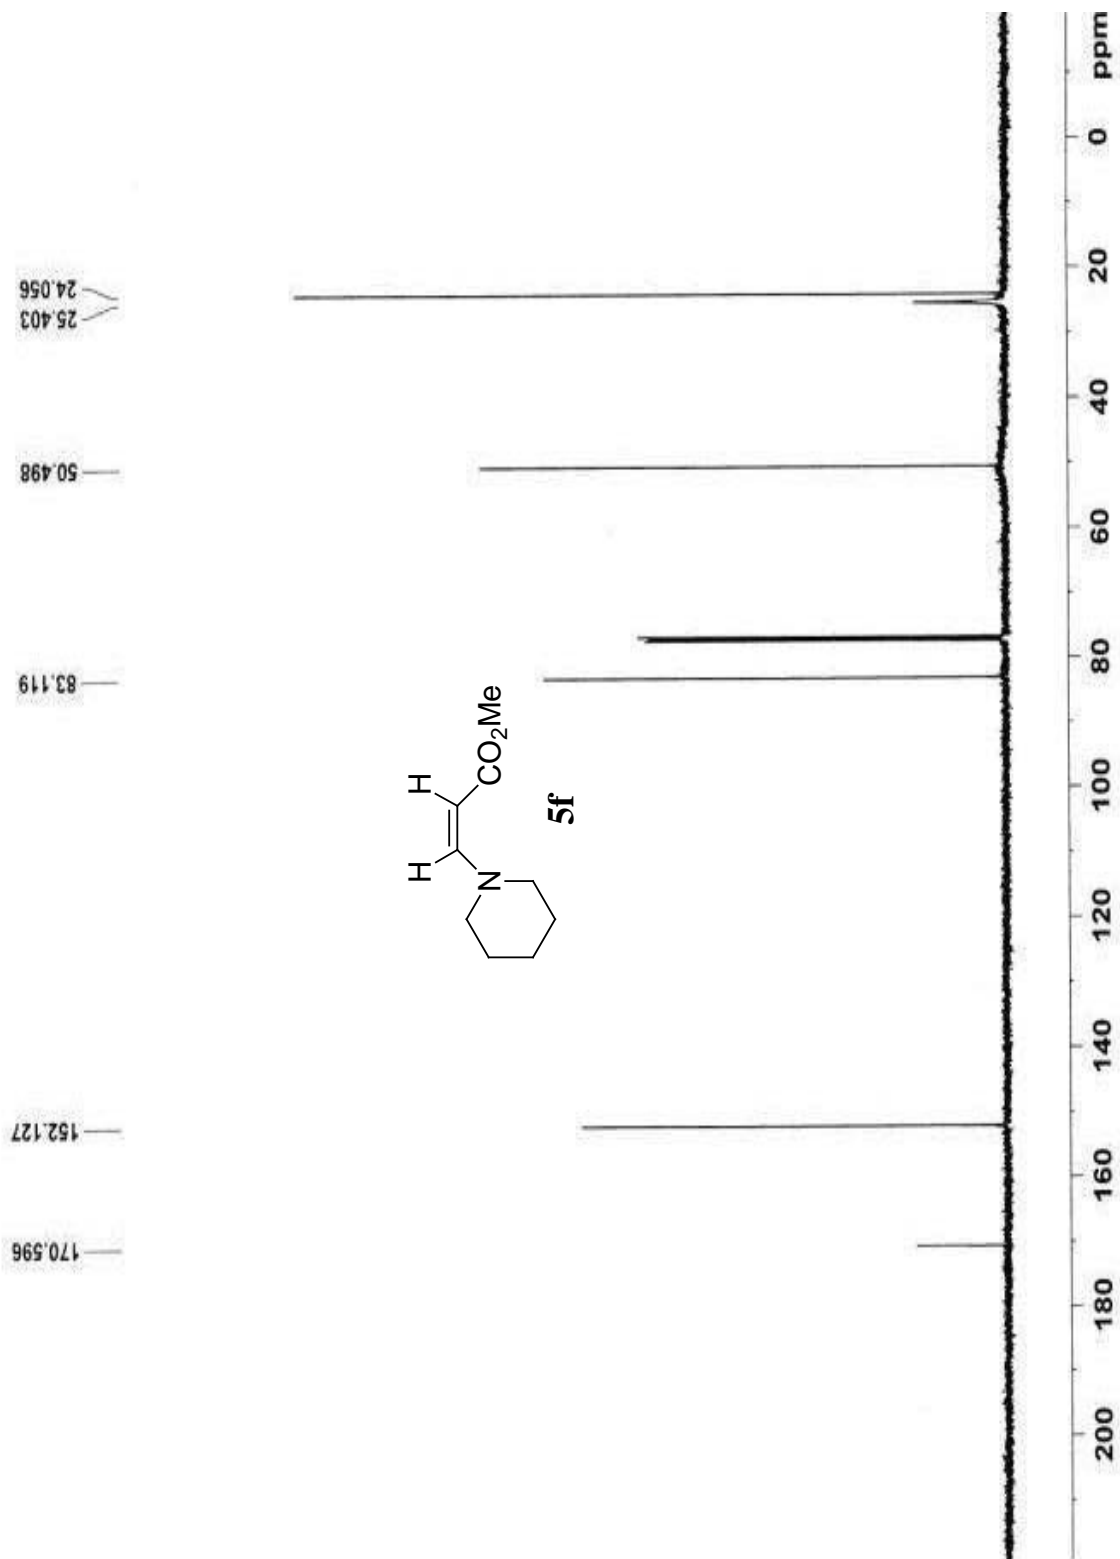

Supplementary Data

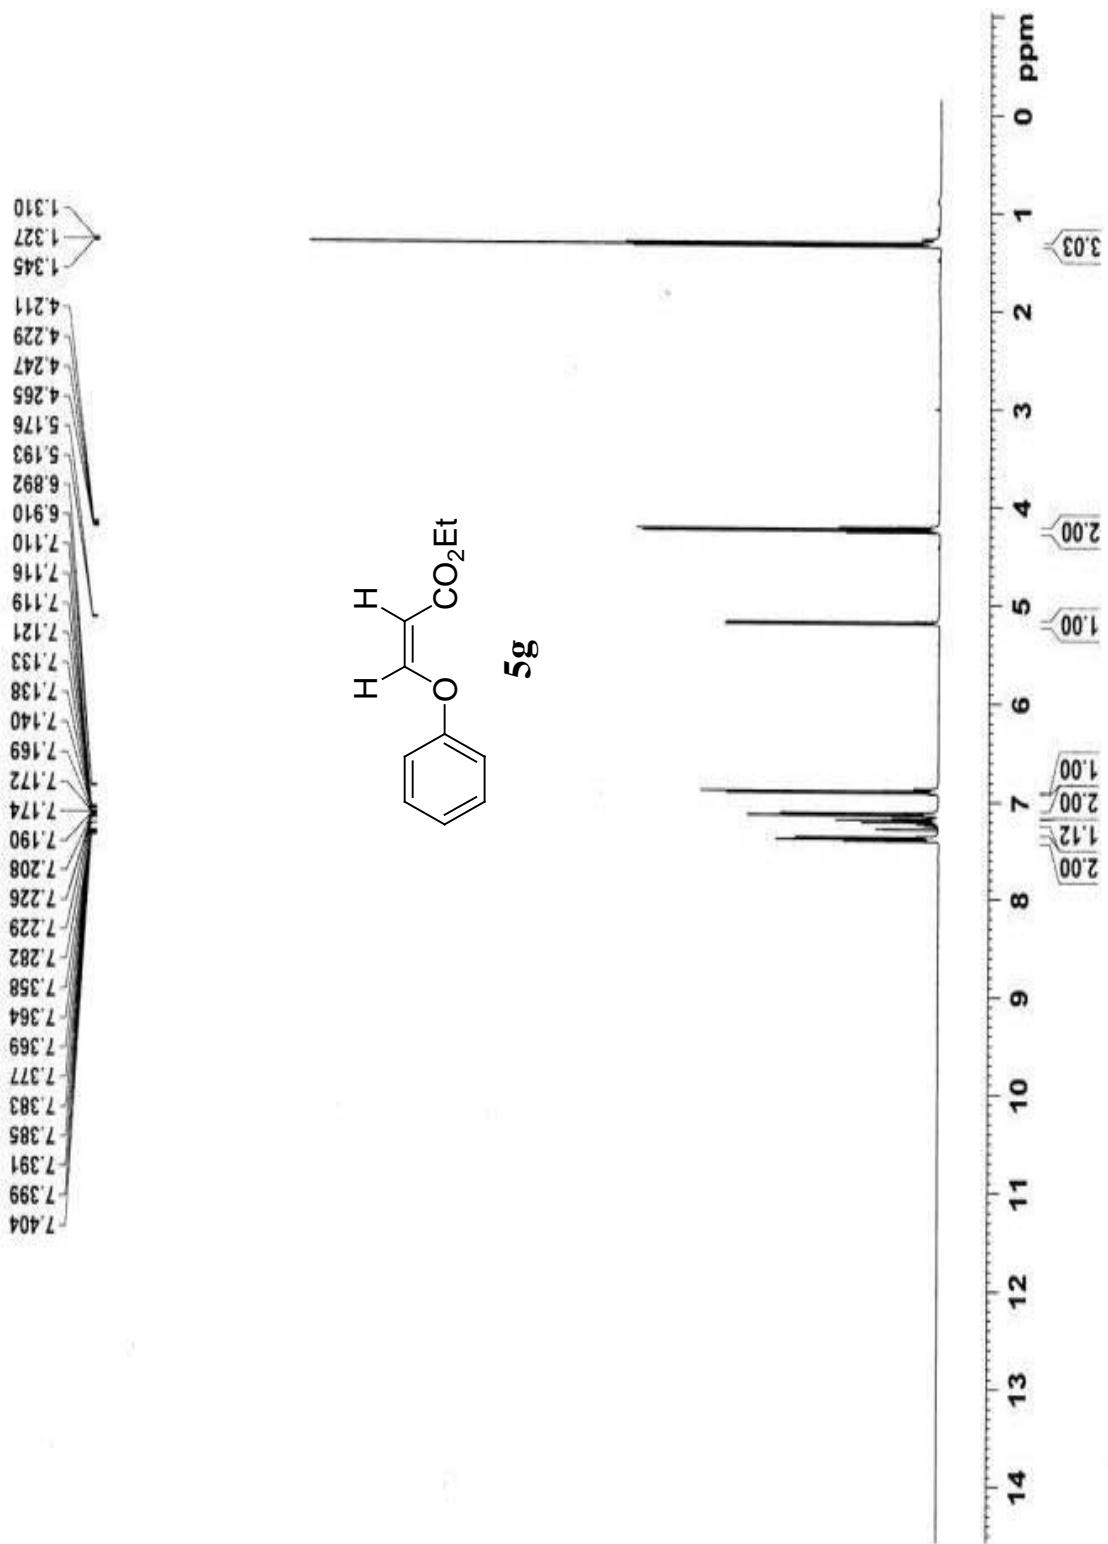

Supplementary Data

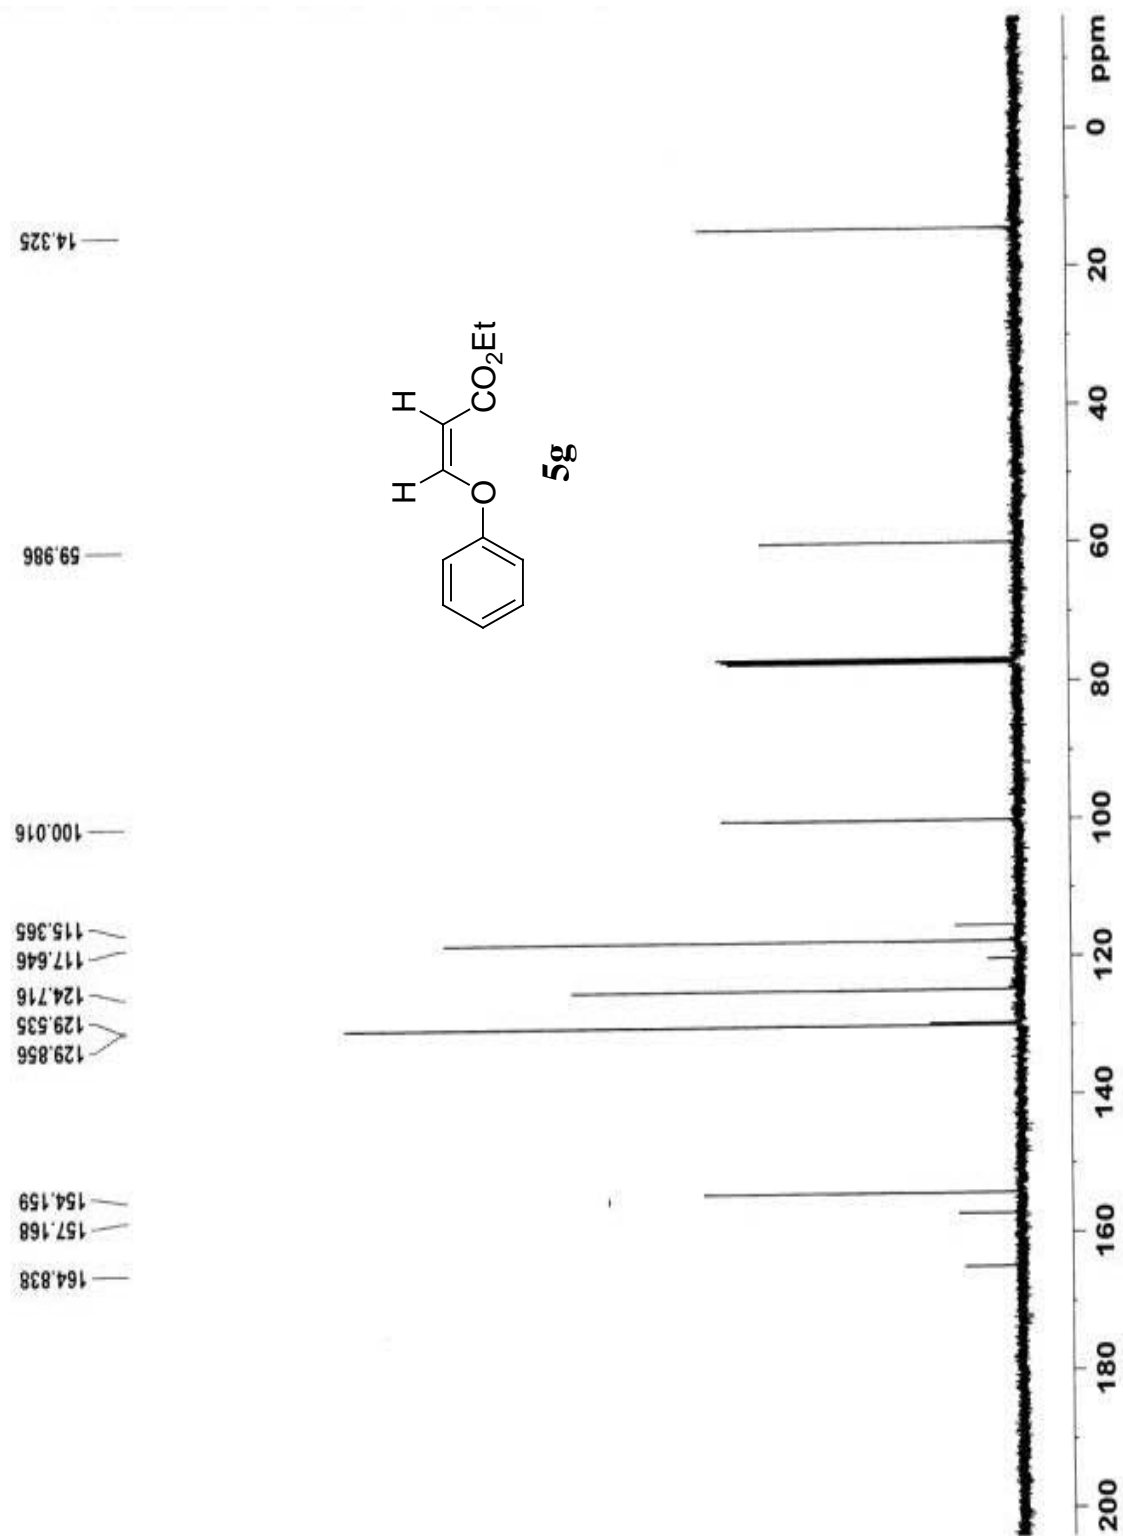



Supplementary Data

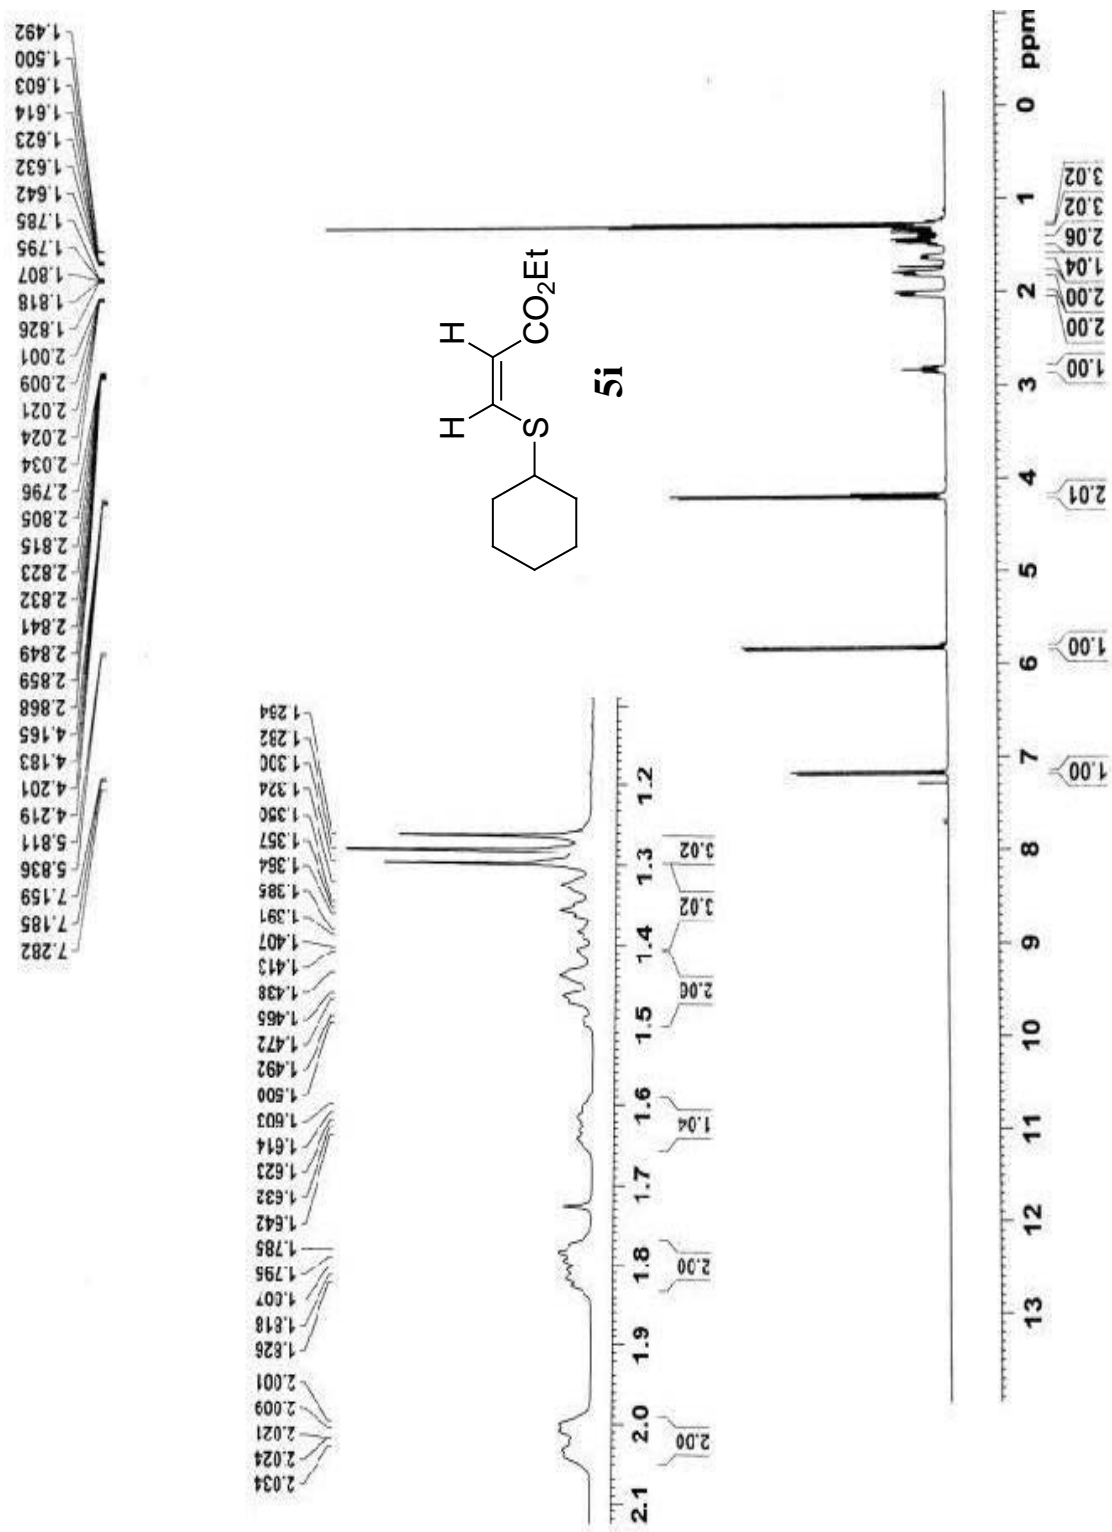

Supplementary Data

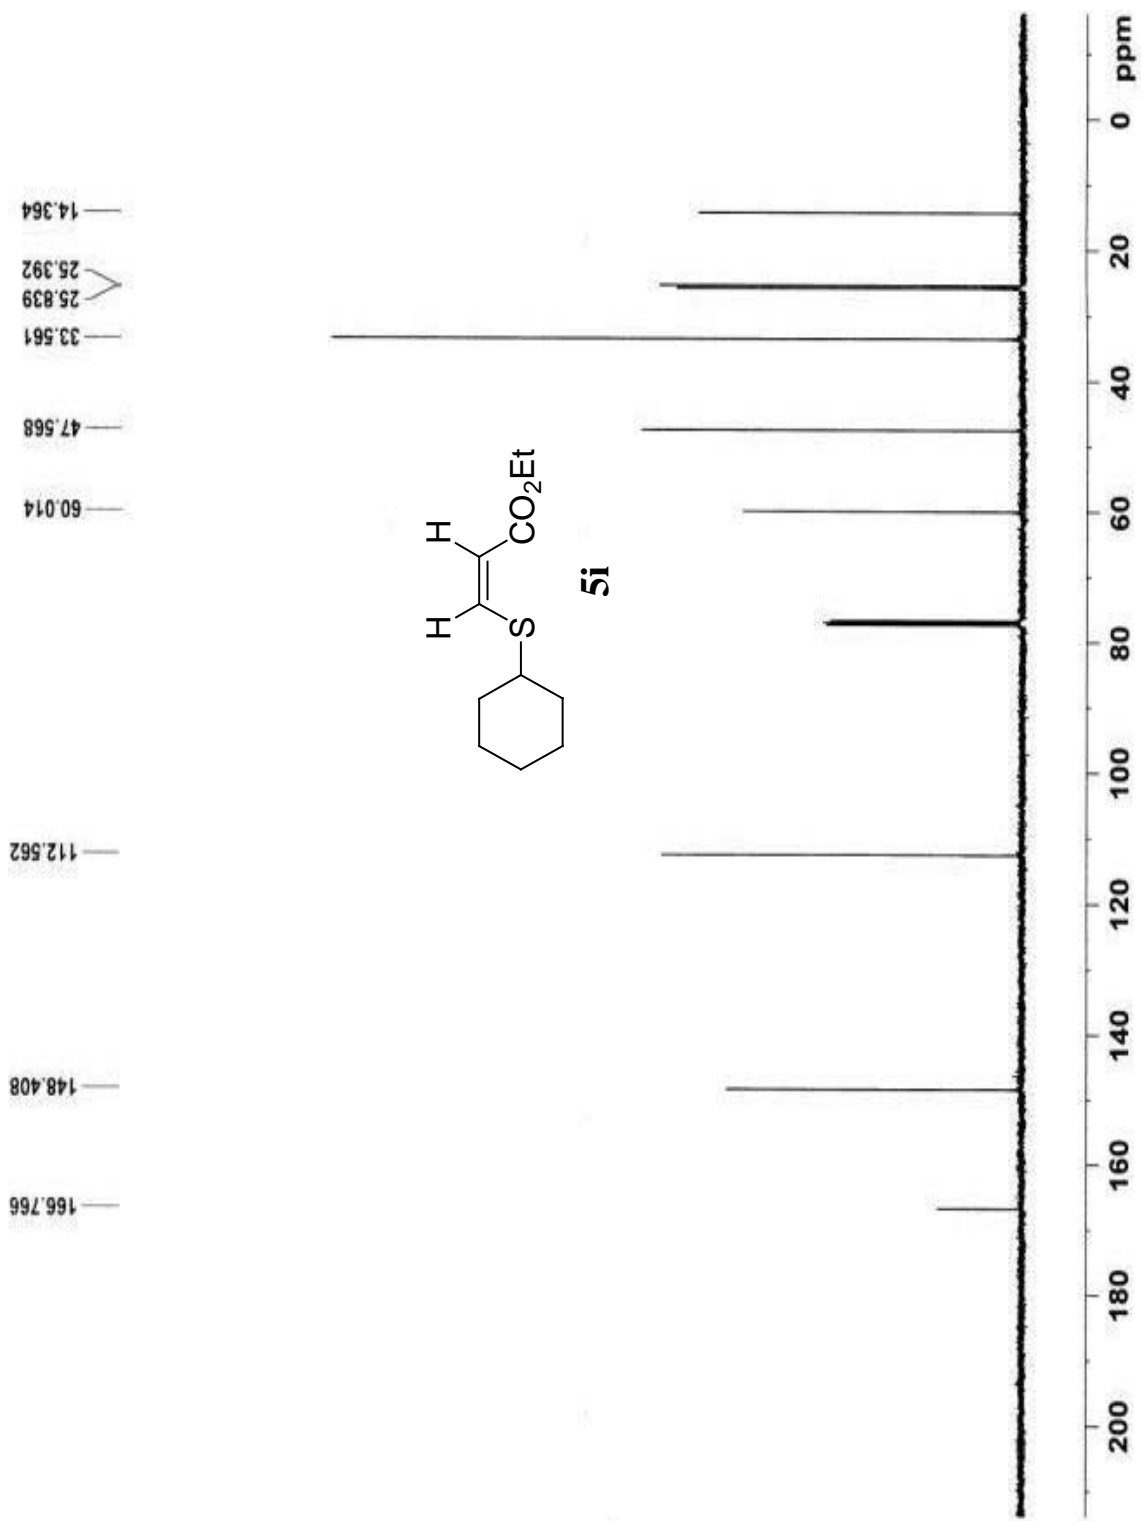

Supplementary Data

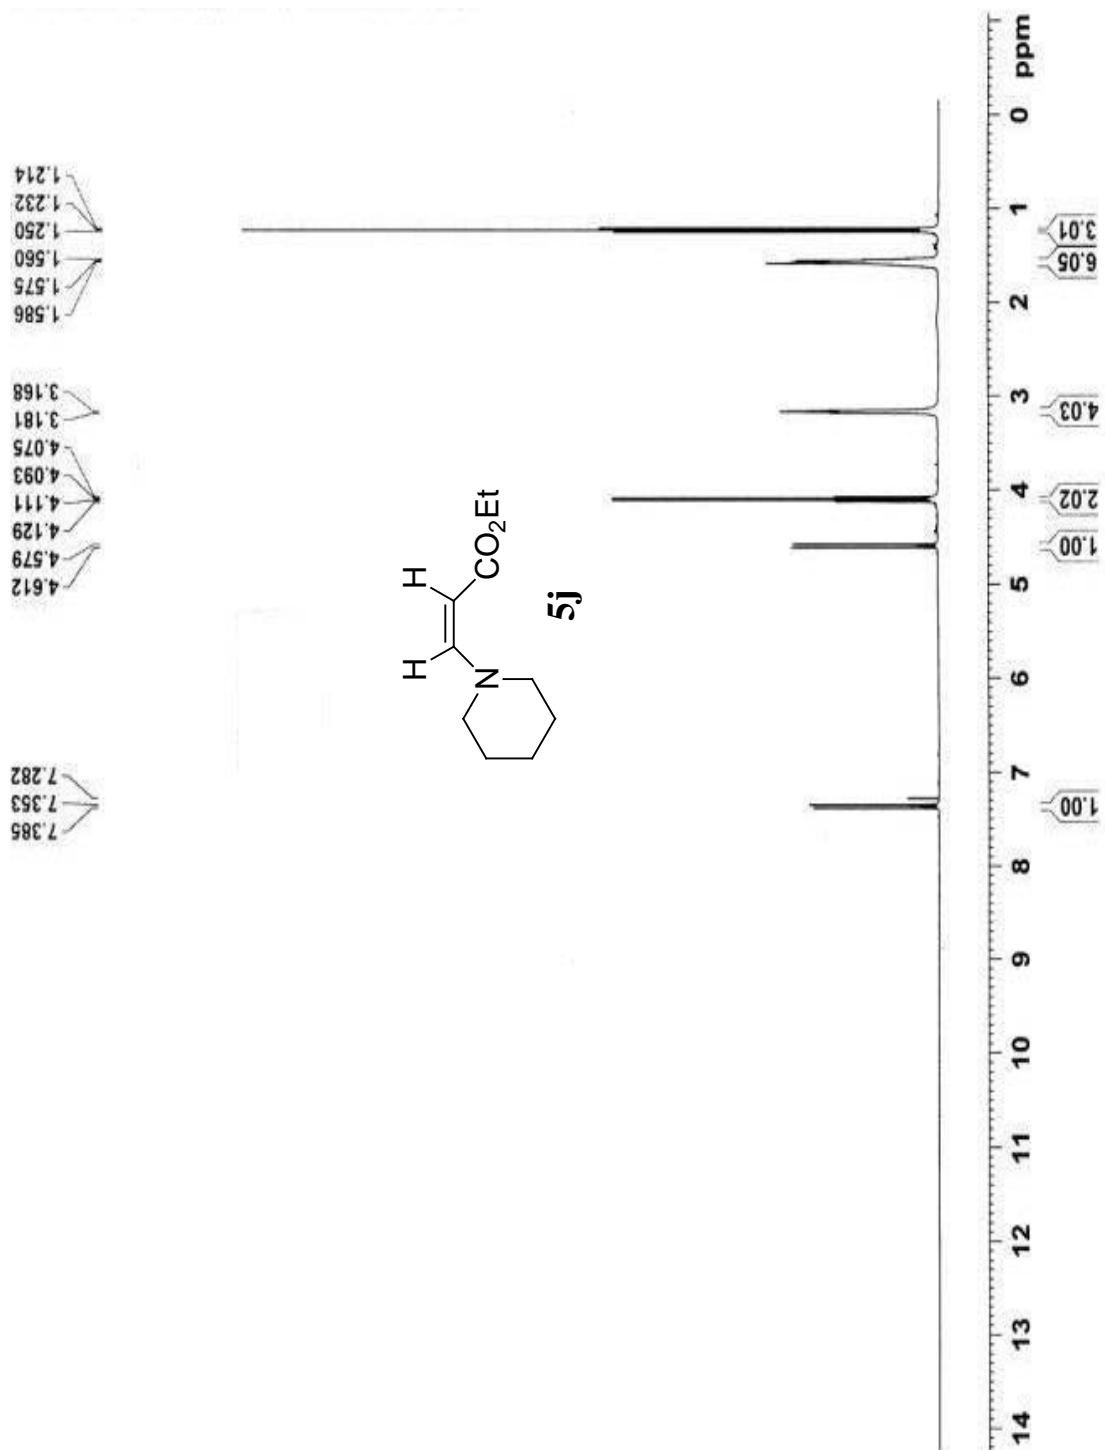

Supplementary Data

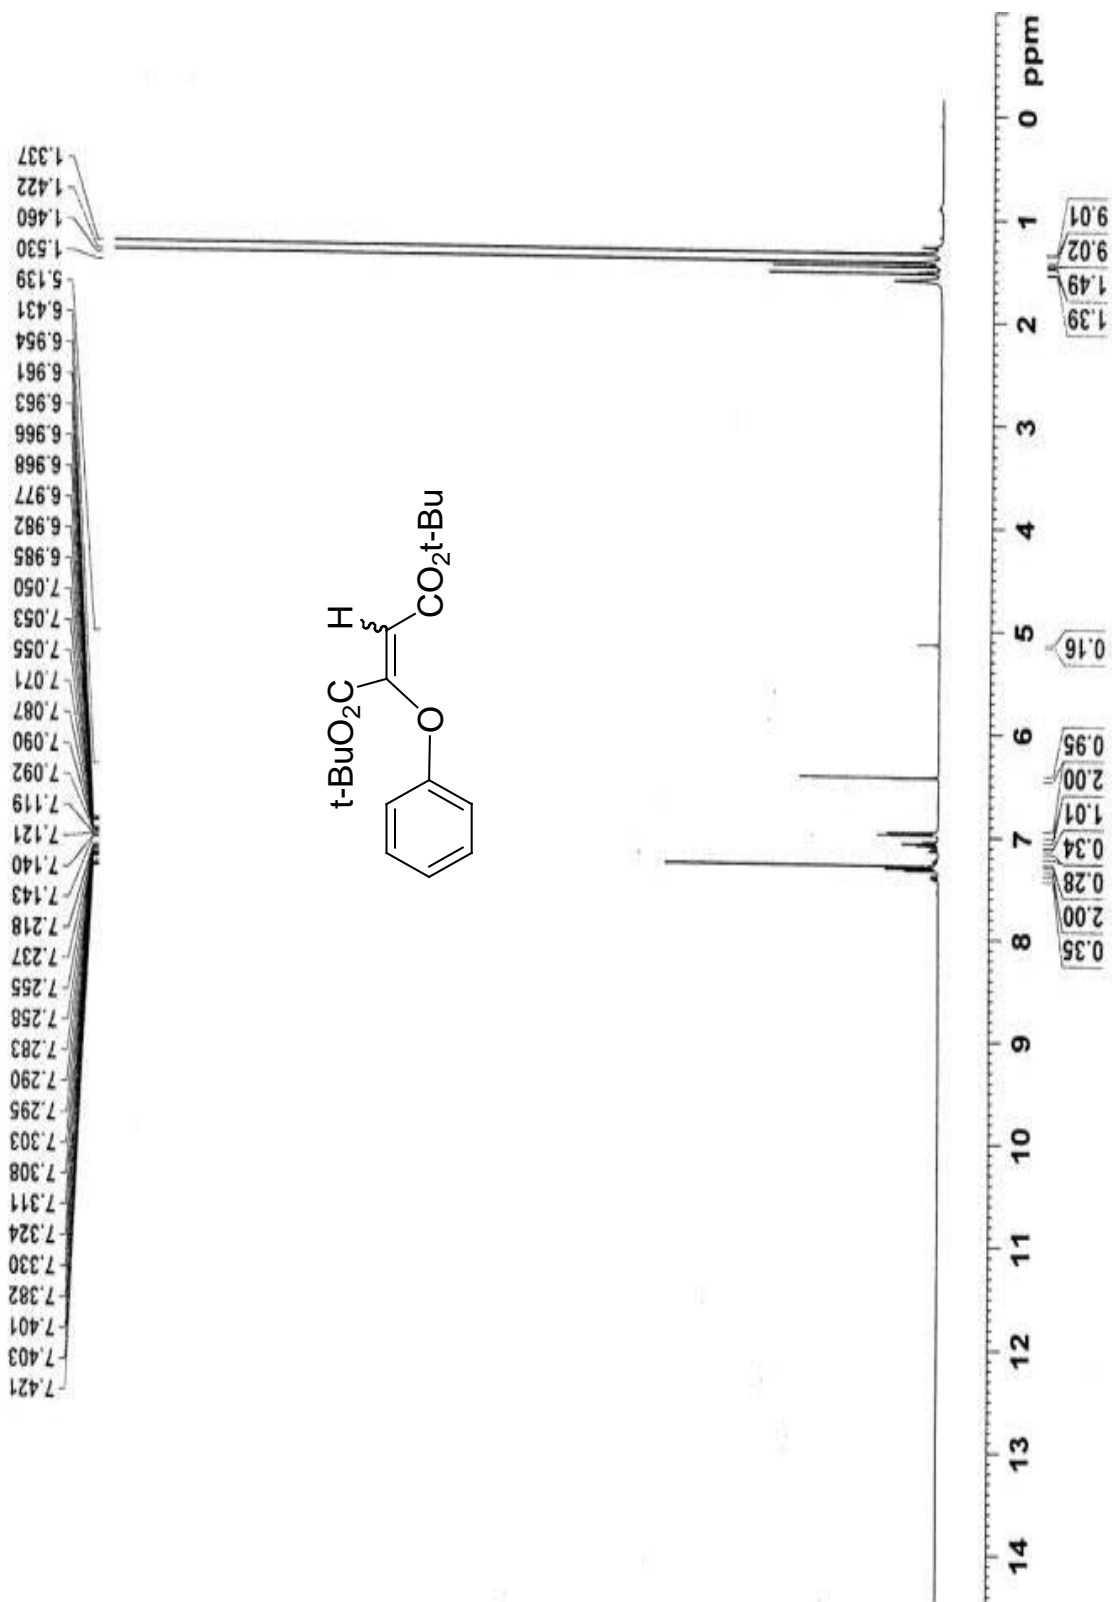

Supplementary Data

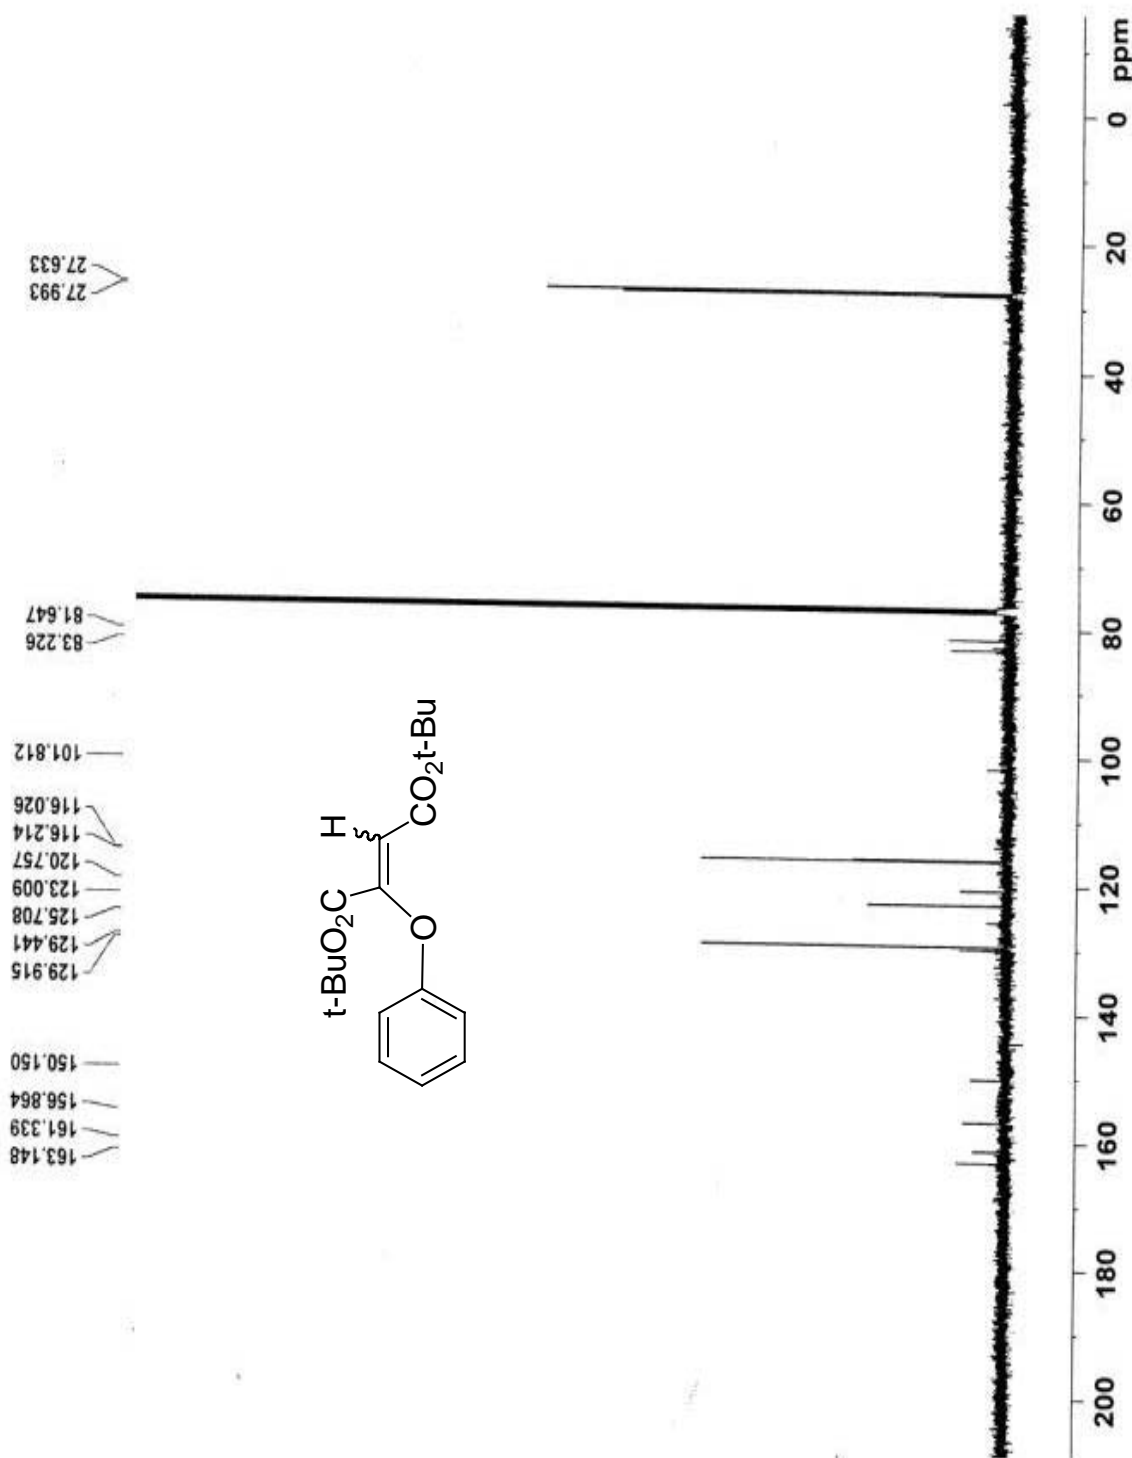

Supplement: c1gc15625j.pdf [file c1gc15625j.pdf]
